# Supplementary material for: Evaluation of phytoconstituents in marigold effluent for their antifungal activity against plant pathogens
Source: PubMed Central journal article supplement (PMC11025535; doi:10.3389/ffunb.2024.1345543), 2024-04-04

## **Evaluation of Phytoconstituents in Marigold (*Tagetes erecta* L.) Effluent for Their Antifungal Activity against Plant Pathogens**

Tulja Sanam <sup>1</sup> \*, Umashankar Nagaraju <sup>1</sup>, Benherlal P. S <sup>2</sup>, Sridhar Goud Nerella <sup>3</sup>, Jayaramaiah. R <sup>4</sup>, Kadalli. G. G <sup>5</sup> and Satya Srii. V <sup>6</sup>

<sup>1</sup>Department of Agricultural Microbiology, University of Agricultural Sciences, Bangalore 560065, India

<sup>2</sup>Department of Plant Biotechnology, University of Agricultural Sciences, Bangalore 560065, India; benherlal@gmail.com

<sup>3</sup>Department of Medicinal Chemistry, National Institute of Pharmaceutical Education and Research (NIPER), Hyderabad 500037, India; sridhar.ku23@gmail.com

<sup>4</sup>Department of Agronomy, University of Agricultural Sciences, Bangalore 560065, India; jayaram.uas@gmail.com

<sup>5</sup>Department of Soil Science and Analytical Chemistry, University of Agricultural Sciences, Bangalore 560065, India; ggkadalli@rediffmail.com

<sup>6</sup>Department of Seed Science and Technology, University of Agricultural Sciences, Bangalore 560065, India; sriinila@gmail.com

\*Correspondence: tuljasanam@gmail.com (T.S.)

| <b>Sl. No.</b> | <b>Title</b>                                                                                                                                                 | <b>Page No.</b> |
|----------------|--------------------------------------------------------------------------------------------------------------------------------------------------------------|-----------------|
| 1.             | Figure S1: Processing of Marigold flowers                                                                                                                    | 3               |
| 2.             | Figure S2: Treatment process of untreated effluent after processing flowers                                                                                  | 4               |
| 3.             | Principal Component Analysis (PCA) Data- PC Scores, Scoreplot, Eigenvalues, Covariance matrix and standardized values of both TMFE and UMFE components (a-f) | 5, 6            |
| 4.             | Identification of compounds based on fragments data using NIST library                                                                                       | 7               |

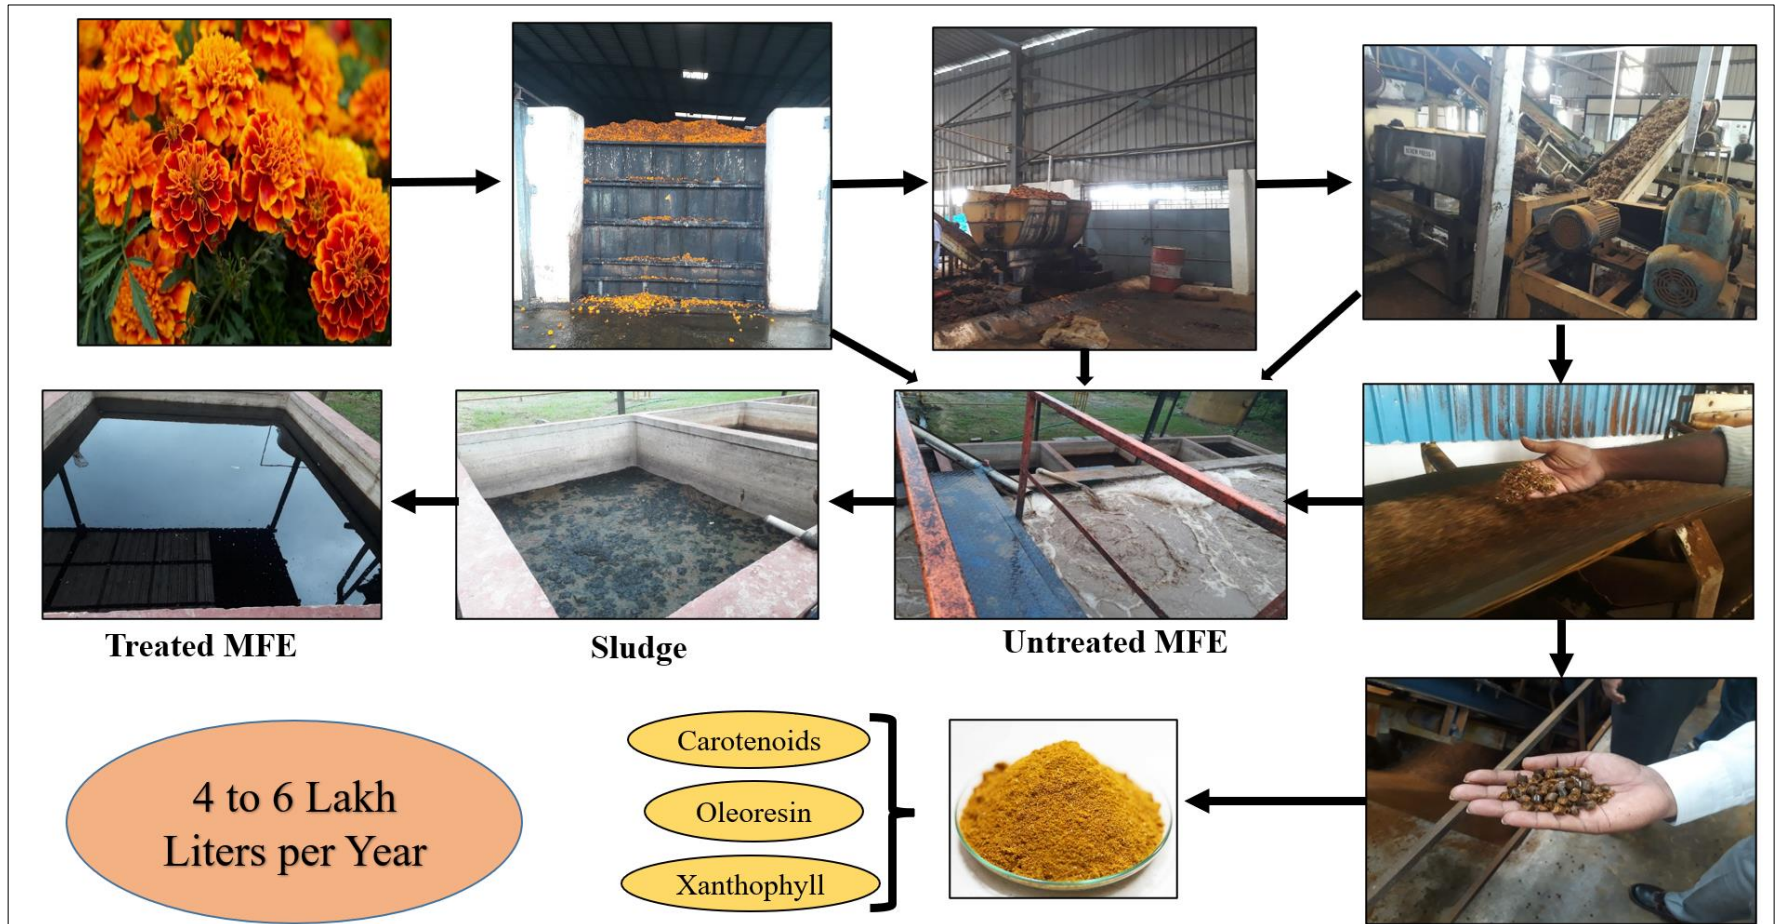

Fig. S1: Processing of marigold flowers in the industry and collection of treated and untreated marigold flower effluent (TMFE and UMFE) during the process –  
 Flow chart: The process is as follows collecting marigold flowers, silage preparation, pressing, drying, pelletization and extraction of carotenoids, oleoresins and xanthophylls.

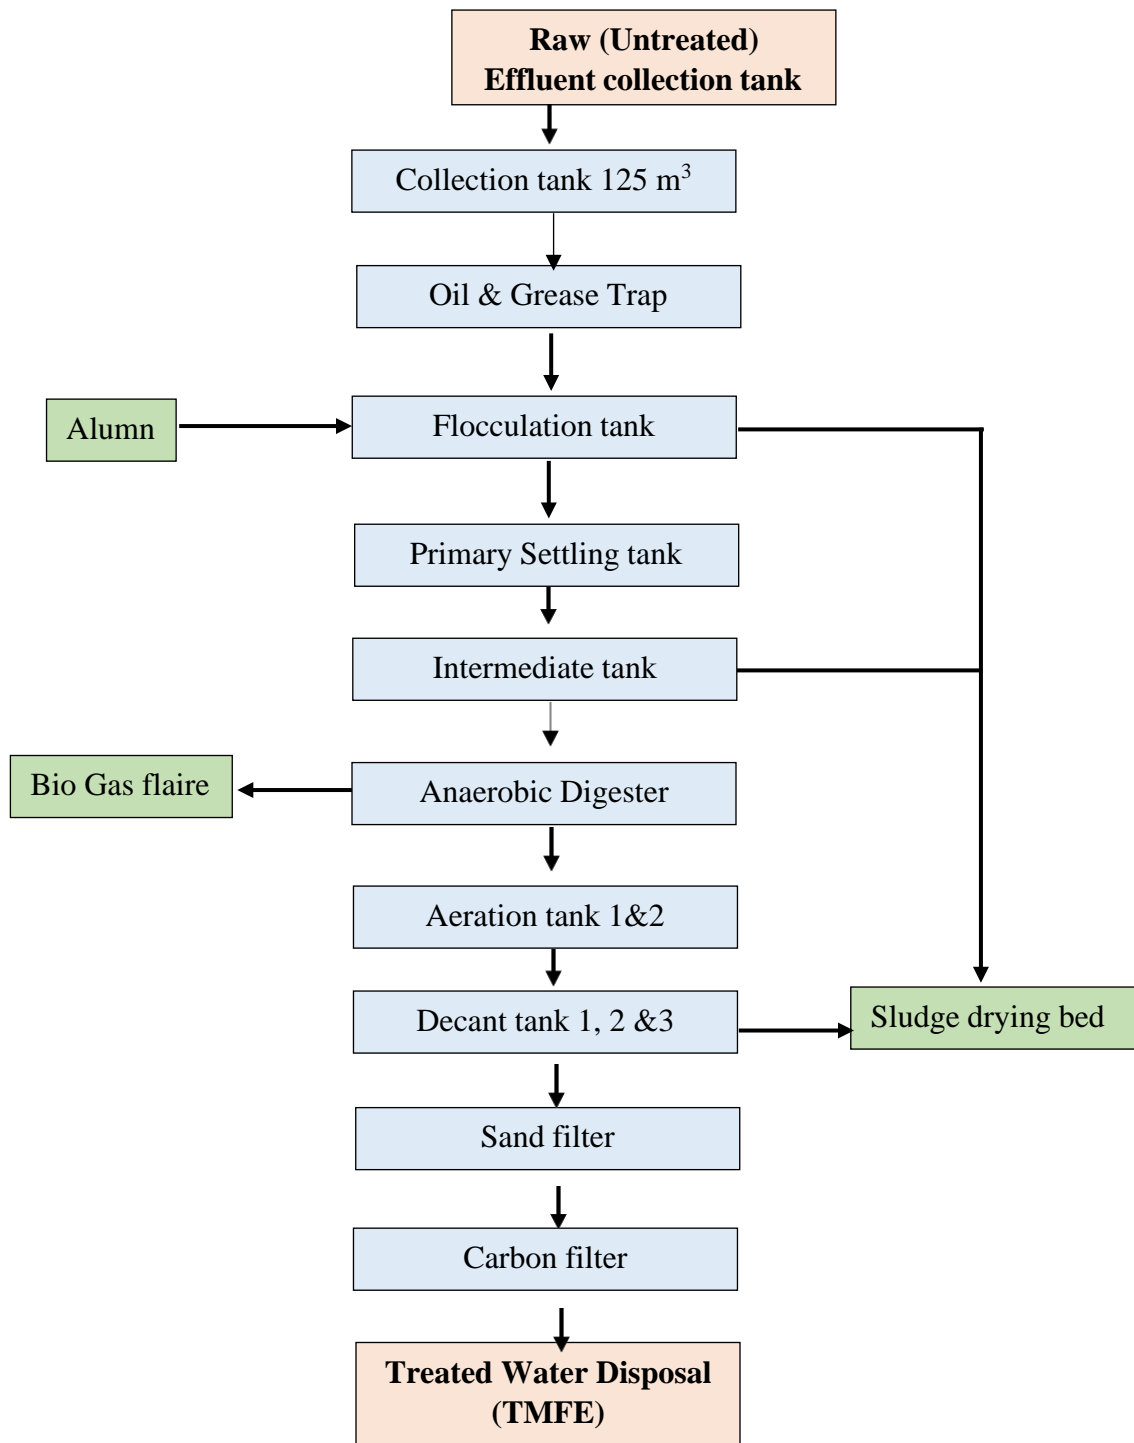

Fig. S2: Flow chart for treatment of untreated marigold flower effluent (UMFE) to form Treated marigold flower effluent (TMFE)

- The collected untreated effluent at different stages is collected into a collection tank Grease and oil is removed using different sized sieve traps
- Further moved to Flocculation tank where alum is added for sedimentation
- Later transferred to Primary settling tank, Aeration tank, Decant tank, During this process Biogas is collected for other purposes and the Effluent free of solid particles, oil and grease are passed through Sand and Carbon Filters for safe Disposal

## Principle Component Analysis (PCA) Raw Data

### a) Functional group compounds in TMFE and UMFE

| Organic Compounds group | TMFE | UMFE |
|-------------------------|------|------|
| Carboxylic acid         | 4    | 11   |
| Alkene                  | 5    | 2    |
| Ester                   | 3    | 1    |
| Alcohol                 | 2    | 2    |
| Alkane                  | 1    | 0    |
| Aldehyde                | 1    | 0    |
| Flavonoid               | 1    | 0    |
| Cyanide                 | 1    | 0    |
| Polycyclic aromatic     | 0    | 1    |
| Cyclo alkane            | 0    | 1    |
| Cyclo alkene            | 0    | 1    |
| Phenol                  | 0    | 3    |
| Heterocyclic            | 0    | 1    |

### b) Eigenvalues

| Parameter      | PC <sub>1</sub> | PC <sub>2</sub> |
|----------------|-----------------|-----------------|
| Eigenvalue     | 1.5012          | 0.4988          |
| % of Variance  | 75.0582         | 24.9418         |
| Cumulative (%) | 75.0582         | 100             |

### c) Scores

| Compounds           | PC <sub>1</sub> | PC <sub>2</sub> |
|---------------------|-----------------|-----------------|
| Carboxylic acid     | 3.3493          | -1.1215         |
| Alkene              | 1.5957          | 1.4839          |
| Ester               | 0.5017          | 0.8743          |
| Alcohol             | 0.318           | 0.2062          |
| Alkane              | -0.5923         | 0.2646          |
| Aldehyde            | -0.5923         | 0.2646          |
| Flavonoid           | -0.5923         | 0.2646          |
| Cyanide             | -0.5923         | 0.2646          |
| Polycyclic aromatic | -0.776          | -0.4034         |
| Cyclo alkane        | -0.776          | -0.4034         |
| Cyclo alkene        | -0.776          | -0.4034         |
| Phenol              | -0.2917         | -0.8878         |
| Heterocyclic        | -0.776          | -0.4034         |

### d) The covariance matrix

| Group\Group | TMFE   | UMFE   |
|-------------|--------|--------|
| TMFE        | 1      | 0.5012 |
| UMFE        | 0.5012 | 1      |

e) **The standardized table**

| Compounds           | TMFE    | UMFE    |
|---------------------|---------|---------|
| Carboxylic acid     | 1.5753  | 3.1614  |
| Alkene              | 2.1776  | 0.07903 |
| Ester               | 0.973   | -0.2634 |
| Alcohol             | 0.3707  | 0.07903 |
| Alkane              | -0.2317 | -0.6059 |
| Aldehyde            | -0.2317 | -0.6059 |
| Flavonoid           | -0.2317 | -0.6059 |
| Cyanide             | -0.2317 | -0.6059 |
| Polycyclic aromatic | -0.834  | -0.2634 |
| Cyclo alkane        | -0.834  | -0.2634 |
| Cyclo alkene        | -0.834  | -0.2634 |
| Phenol              | -0.834  | 0.4215  |
| Heterocyclic        | -0.834  | -0.2634 |

f) **Scoreplot**

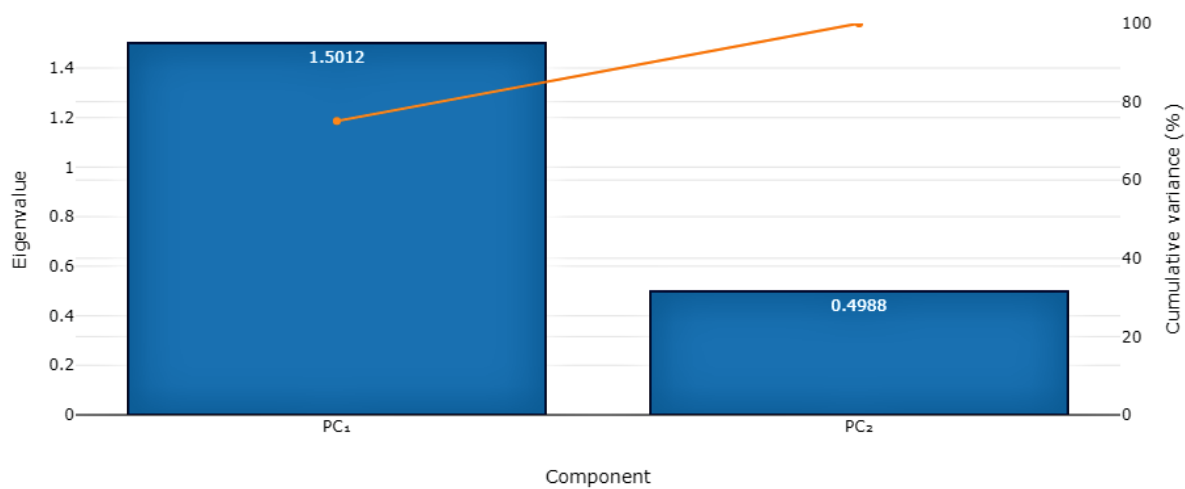

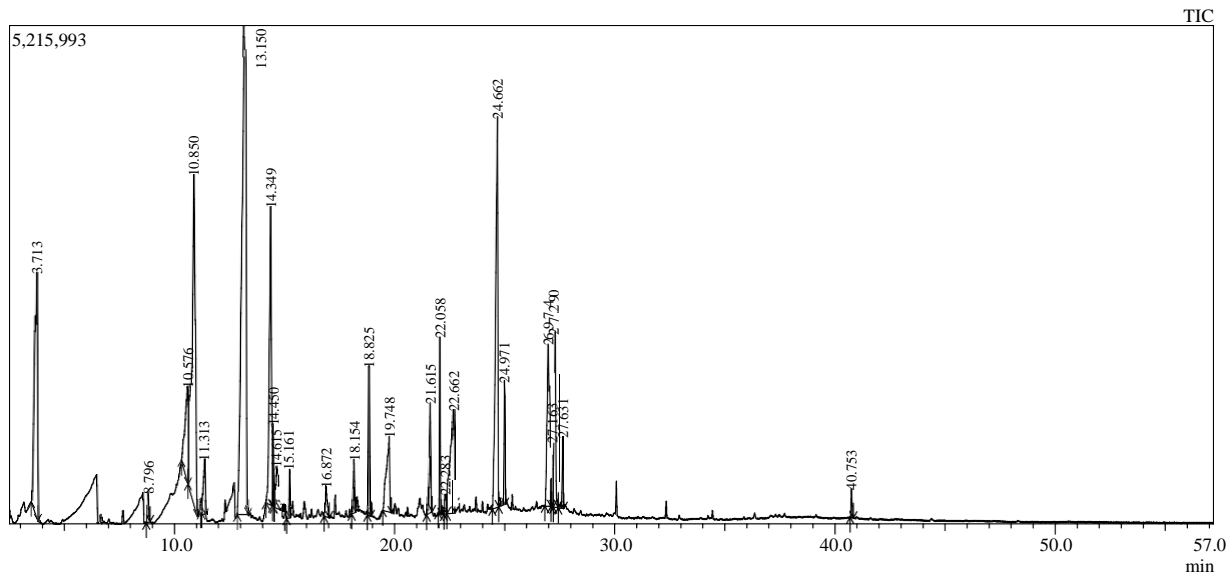

| Peak# | R.Time | I.Time | F.Time | Area      | Area%  | Height   | Height% | A/H   | Mark | Name                              |
|-------|--------|--------|--------|-----------|--------|----------|---------|-------|------|-----------------------------------|
| 1     | 3.713  | 3.500  | 3.800  | 20136833  | 7.55   | 2544150  | 7.07    | 7.91  |      | 2-Furanmethanol, tetrahydro-      |
| 2     | 8.796  | 8.717  | 8.900  | 1333784   | 0.50   | 306887   | 0.85    | 4.35  |      | Phenylethyl Alcohol               |
| 3     | 10.576 | 10.317 | 10.617 | 9580474   | 3.59   | 984436   | 2.74    | 9.73  |      | Cyclohexanecarboxylic acid        |
| 4     | 10.850 | 10.617 | 11.033 | 34759682  | 13.02  | 3430057  | 9.53    | 10.13 | V    | Catechol                          |
| 5     | 11.313 | 11.200 | 11.367 | 3236274   | 1.21   | 566791   | 1.57    | 5.71  | V    | Octanoic acid                     |
| 6     | 13.150 | 12.833 | 13.333 | 65106687  | 24.40  | 5117352  | 14.22   | 12.72 |      | Resorcinol                        |
| 7     | 14.349 | 14.150 | 14.433 | 20242856  | 7.59   | 3122647  | 8.68    | 6.48  |      | Phenol, 2,6-dimethoxy-            |
| 8     | 14.450 | 14.433 | 14.517 | 2338227   | 0.88   | 857900   | 2.38    | 2.73  | V    | Hydrocinnamic acid                |
| 9     | 14.615 | 14.517 | 14.817 | 4069238   | 1.52   | 434269   | 1.21    | 9.37  | V    | trans-4-Hydroxycyclohexanecar     |
| 10    | 15.161 | 15.100 | 15.250 | 1798824   | 0.67   | 506725   | 1.41    | 3.55  |      | Carbonic acid, ethyl tetradecyl e |
| 11    | 16.872 | 16.800 | 17.033 | 1821960   | 0.68   | 310183   | 0.86    | 5.87  |      | 2-Ethyl-1,3-dimethylcyclopent-2   |
| 12    | 18.154 | 18.050 | 18.233 | 2595443   | 0.97   | 559768   | 1.56    | 4.64  |      | 2-Cyclohexen-1-one, 3-(hydroxy    |
| 13    | 18.825 | 18.767 | 18.917 | 4692184   | 1.76   | 1559786  | 4.33    | 3.01  |      | 1-Pentadecene                     |
| 14    | 19.748 | 19.467 | 19.850 | 8150945   | 3.05   | 787788   | 2.19    | 10.35 |      | Benzenepropanoic acid, 4-hydro    |
| 15    | 21.615 | 21.450 | 21.700 | 5895152   | 2.21   | 1149838  | 3.19    | 5.13  |      | Tetradecanoic acid                |
| 16    | 22.058 | 21.983 | 22.117 | 5400650   | 2.02   | 1849183  | 5.14    | 2.92  |      | 1-Nonadecene                      |
| 17    | 22.283 | 22.233 | 22.367 | 1311174   | 0.49   | 204343   | 0.57    | 6.42  | V    | 7,7-Dimethoxy-2,3,4,5,6,7-hexa    |
| 18    | 22.662 | 22.367 | 22.750 | 12710493  | 4.76   | 1074594  | 2.99    | 11.83 | V    | Benzoic acid, 4-hydroxy-3,5-dim   |
| 19    | 24.662 | 24.433 | 24.733 | 28680690  | 10.75  | 4088328  | 11.36   | 7.02  |      | n-Hexadecanoic acid               |
| 20    | 24.971 | 24.733 | 25.017 | 3932359   | 1.47   | 1288963  | 3.58    | 3.05  | V    | 1-Nonadecene                      |
| 21    | 26.974 | 26.817 | 27.100 | 14167420  | 5.31   | 1693162  | 4.70    | 8.37  |      | Oleic Acid                        |
| 22    | 27.163 | 27.100 | 27.200 | 2973354   | 1.11   | 680279   | 1.89    | 4.37  | V    | 7-Acetyl-3,6-dihydroxy-8-methy    |
| 23    | 27.290 | 27.200 | 27.433 | 8816407   | 3.30   | 1835572  | 5.10    | 4.80  | V    | Octadecanoic acid                 |
| 24    | 27.631 | 27.433 | 27.683 | 2135418   | 0.80   | 742336   | 2.06    | 2.88  | V    | 1-Nonadecene                      |
| 25    | 40.753 | 40.683 | 40.833 | 986787    | 0.37   | 298114   | 0.83    | 3.31  |      | Tris(2,4-di-tert-butylphenyl) pho |
|       |        |        |        | 266873315 | 100.00 | 35993451 | 100.00  |       |      |                                   |

Library

<< Target >>

Line#1 R.Time:3.717(Scan#:74) MassPeaks:358  
RawMode:Averaged 3.700-3.733(73-75) BasePeak:71.10(460218)  
BG Mode:Calc. from Peak Group 1 - Event 1 Scan

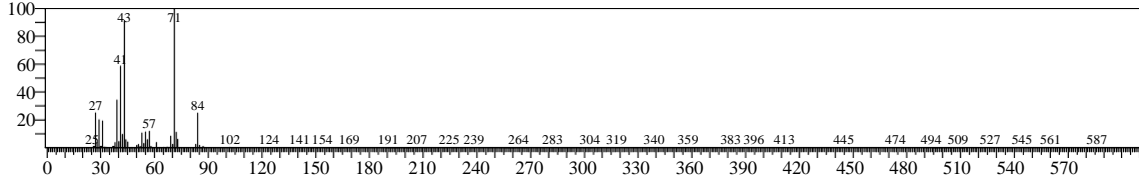

Hit#1 Entry:2429 Library:NIST20R.lib  
SI:89 Formula:C5H10O2 CAS:97-99-4 MolWeight:102 RetIndex:892  
CompName:2-Furanmethanol, tetrahydro- \$\$ Furfuryl alcohol, tetrahydro- \$\$ QO THFA \$\$ Tetrahydro-2-furancarbinol \$\$ Tetrahydro-2-furanmethanol \$\$ T

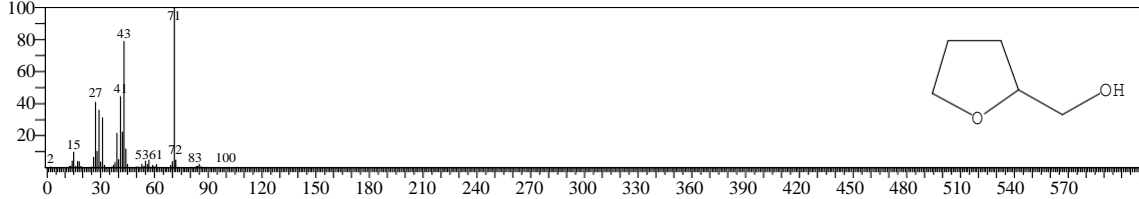

Hit#2 Entry:1076 Library:NIST20R.lib  
SI:88 Formula:C5H10O CAS:96-47-9 MolWeight:86 RetIndex:650  
CompName:Furan, tetrahydro-2-methyl- \$\$ Tetrahydro-2-methylfuran \$\$ Tetrahydroisylvan \$\$ 2-Methyltetrahydrofuran \$\$ Furan, 2-methyl-tetrahydro- \$\$ M

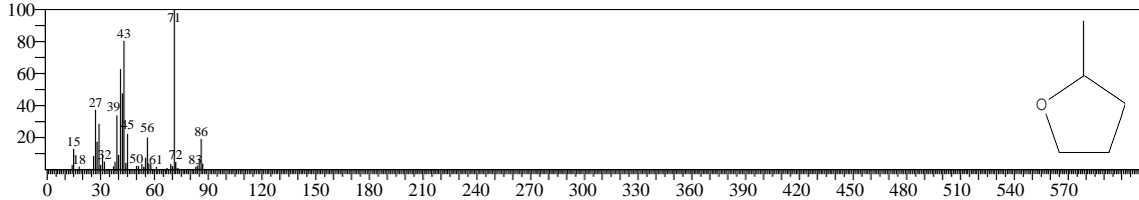

Hit#3 Entry:2430 Library:NIST20R.lib  
SI:88 Formula:C5H10O2 CAS:97-99-4 MolWeight:102 RetIndex:892  
CompName:2-Furanmethanol, tetrahydro- \$\$ Furfuryl alcohol, tetrahydro- \$\$ QO THFA \$\$ Tetrahydro-2-furancarbinol \$\$ Tetrahydro-2-furanmethanol \$\$ T

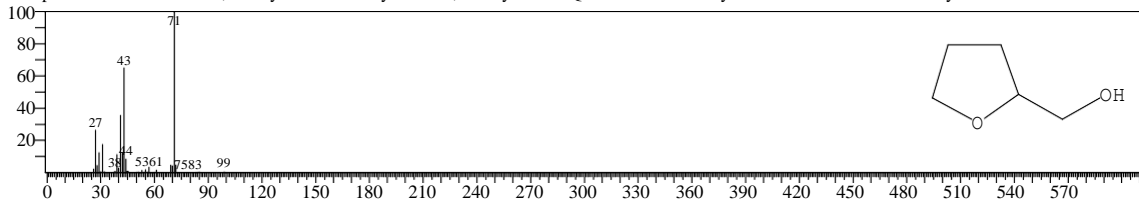

Hit#4 Entry:2392 Library:NIST20M1.lib  
SI:88 Formula:C5H10O2 CAS:15833-61-1 MolWeight:102 RetIndex:892  
CompName:+/--Tetrahydro-3-furanmethanol \$\$ Tetrahydro-3-furanylmethanol #

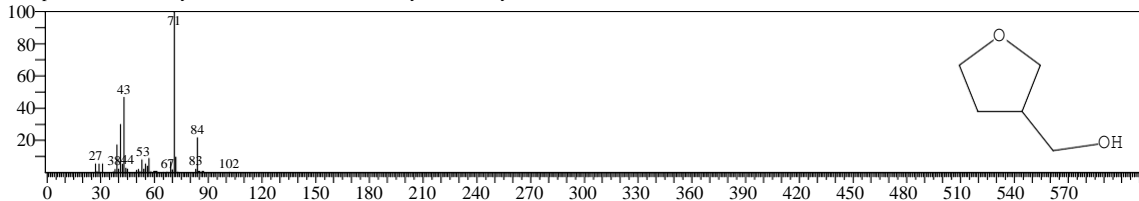

Hit#5 Entry:2471 Library:NIST20M1.lib  
SI:88 Formula:C6H14O CAS:19550-30-2 MolWeight:102 RetIndex:732  
CompName:1-Butanol, 2,3-dimethyl- \$\$ 2,3-Dimethyl-1-butanol \$\$ 2,3-Methylbutanol \$\$ 2,3-Dimethylbutan-1-ol

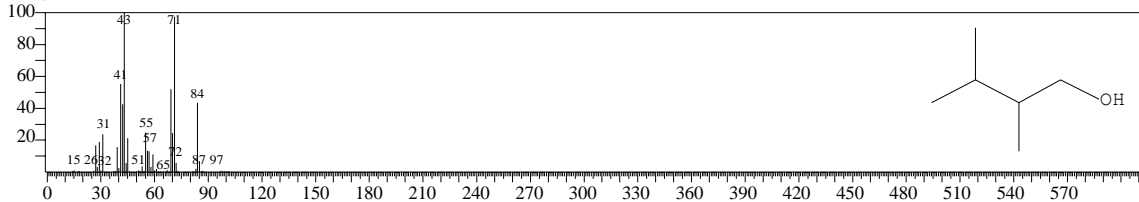



<<Target >>

Line#:2 R.Time:8.800(Scan#:379) MassPeaks:294  
RawMode:Averaged 8.783-8.817(378-380) BasePeak:91.10(91471)  
BG Mode:Calc. from Peak Group 1 - Event 1 Scan

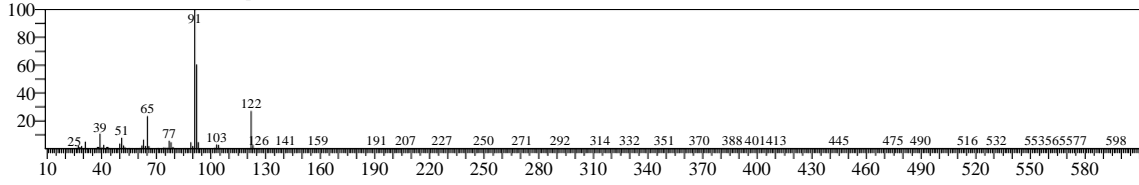

Hit#:1 Entry:6061 Library:NIST20M1.lib  
SI:97 Formula:C8H10O CAS:60-12-8 MolWeight:122 RetIndex:1136  
CompName:Phenylethyl Alcohol \$\$ Benzeneethanol \$\$ Phenethyl alcohol \$\$ .beta.-Hydroxyethylbenzene \$\$ .beta.-Phenethyl alcohol \$\$ .beta.-Phenylethan

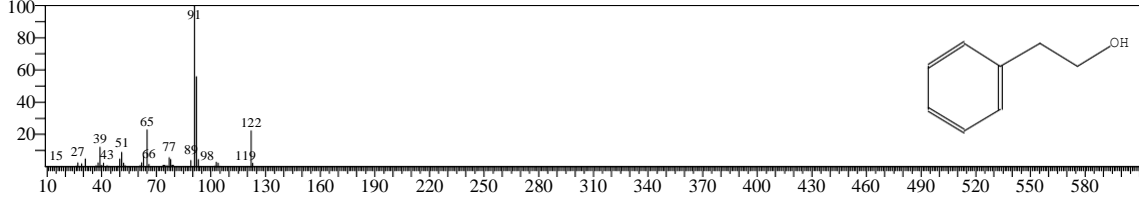

Hit#:2 Entry:5343 Library:NIST20R.lib  
SI:96 Formula:C8H10O CAS:60-12-8 MolWeight:122 RetIndex:1136  
CompName:Phenylethyl Alcohol \$\$ Benzeneethanol \$\$ Phenethyl alcohol \$\$ .beta.-Hydroxyethylbenzene \$\$ .beta.-Phenethyl alcohol \$\$ .beta.-Phenylethan

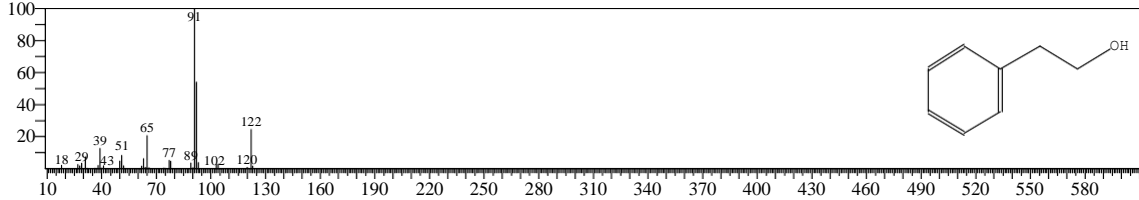

Hit#:3 Entry:5341 Library:NIST20R.lib  
SI:96 Formula:C8H10O CAS:60-12-8 MolWeight:122 RetIndex:1136  
CompName:Phenylethyl Alcohol \$\$ Benzeneethanol \$\$ Phenethyl alcohol \$\$ .beta.-Hydroxyethylbenzene \$\$ .beta.-Phenethyl alcohol \$\$ .beta.-Phenylethan

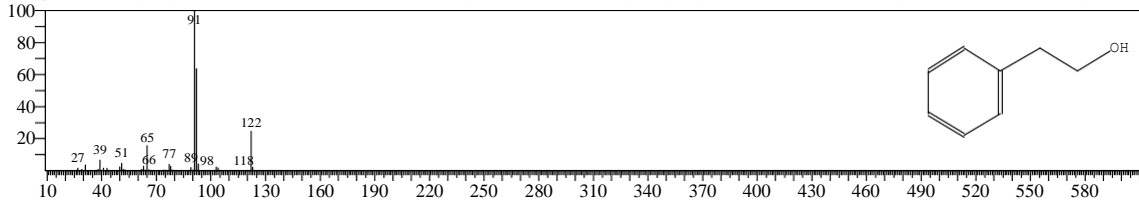

Hit#:4 Entry:5342 Library:NIST20R.lib  
SI:96 Formula:C8H10O CAS:60-12-8 MolWeight:122 RetIndex:1136  
CompName:Phenylethyl Alcohol \$\$ Benzeneethanol \$\$ Phenethyl alcohol \$\$ .beta.-Hydroxyethylbenzene \$\$ .beta.-Phenethyl alcohol \$\$ .beta.-Phenylethan

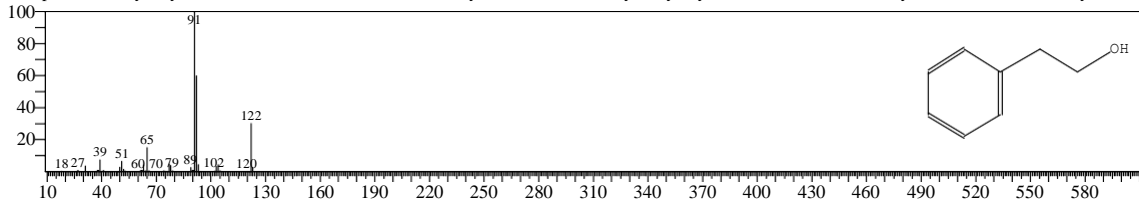

Hit#:5 Entry:5247 Library:NIST20R.lib  
SI:89 Formula:C7H10N2 CAS:555-96-4 MolWeight:122 RetIndex:1235  
CompName:Hydrazine, (phenylmethyl)- \$\$ Hydrazine, benzyl- \$\$ Benzylhydrazine \$\$ Benzyl hydrazide \$\$ 1-Benzylhydrazine # \$\$ (Phenylmethyl)hydrazi

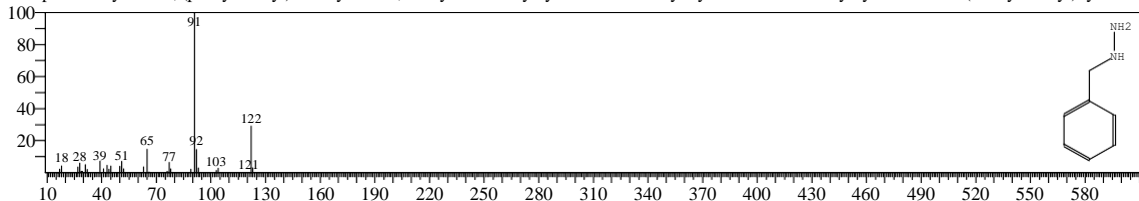

<<Target >>

Line#:3 R.Time:10.583(Scan#:486) MassPeaks:285  
RawMode:Averaged 10.567-10.600(485-487) BasePeak:55.10(26496)  
BG Mode:Calc. from Peak Group 1 - Event 1 Scan

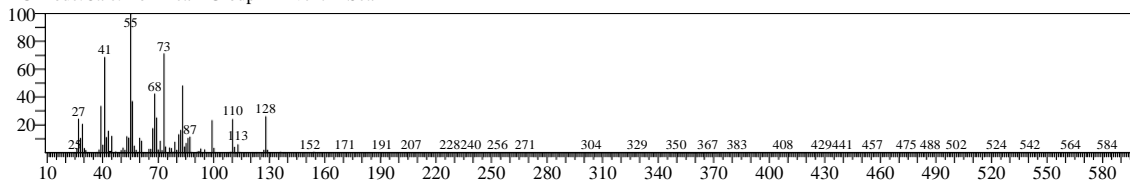

Hit#:1 Entry:7814 Library:NIST20M1.lib  
SI:93 Formula:C7H12O2 CAS:98-89-5 MolWeight:128 RetIndex:1137  
CompName:Cyclohexanecarboxylic acid \$\$ Benzoic acid, hexahydro- \$\$ Cyclohexylcarboxylic acid \$\$ Hexahydrobenzoic acid \$\$ Carboxycyclohexane \$\$

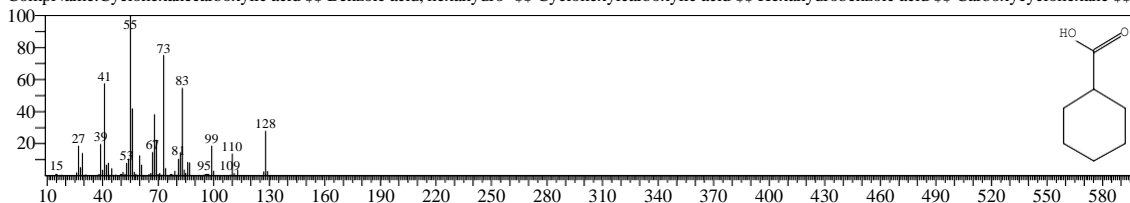

Hit#:2 Entry:6263 Library:NIST20R.lib  
SI:93 Formula:C7H12O2 CAS:98-89-5 MolWeight:128 RetIndex:1137  
CompName:Cyclohexanecarboxylic acid \$\$ Benzoic acid, hexahydro- \$\$ Cyclohexylcarboxylic acid \$\$ Hexahydrobenzoic acid \$\$ Carboxycyclohexane \$\$

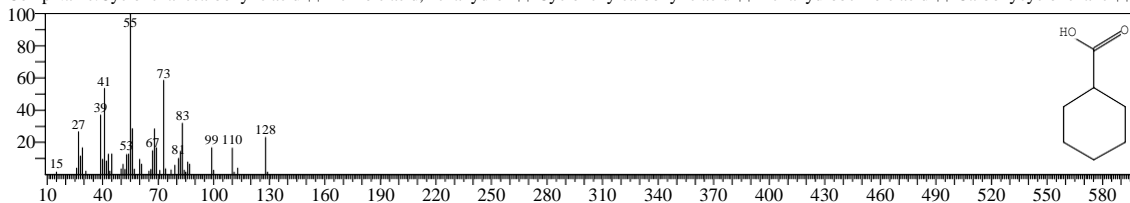

Hit#:3 Entry:6262 Library:NIST20R.lib  
SI:92 Formula:C7H12O2 CAS:98-89-5 MolWeight:128 RetIndex:1137  
CompName:Cyclohexanecarboxylic acid \$\$ Benzoic acid, hexahydro- \$\$ Cyclohexylcarboxylic acid \$\$ Hexahydrobenzoic acid \$\$ Carboxycyclohexane \$\$

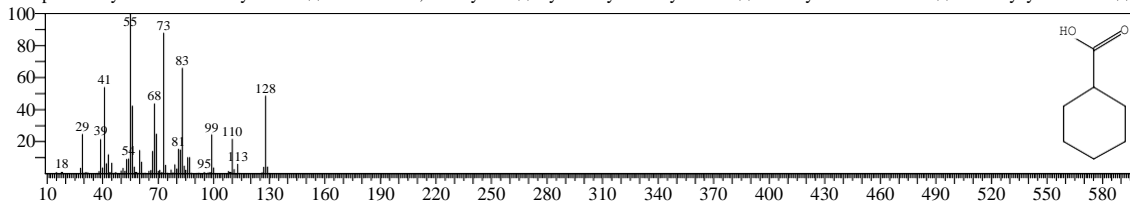

Hit#:4 Entry:7864 Library:NIST20M1.lib  
SI:83 Formula:C7H12O2 CAS:18999-28-5 MolWeight:128 RetIndex:1081  
CompName:2-Heptenoic acid \$\$ Ethyl 2-heptenoate \$\$ (2E)-2-Heptenoic acid #

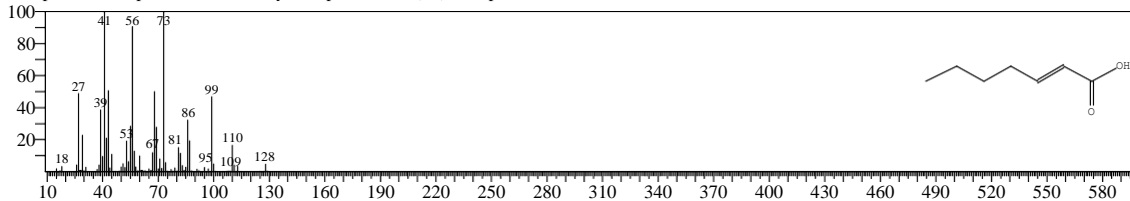

Hit#:5 Entry:7865 Library:NIST20M1.lib  
SI:82 Formula:C7H12O2 CAS:10352-88-2 MolWeight:128 RetIndex:1081  
CompName:Trans-2-heptenoic acid \$\$ 2-Heptenoic acid, (E)- \$\$ 2-Heptenoic acid, trans-

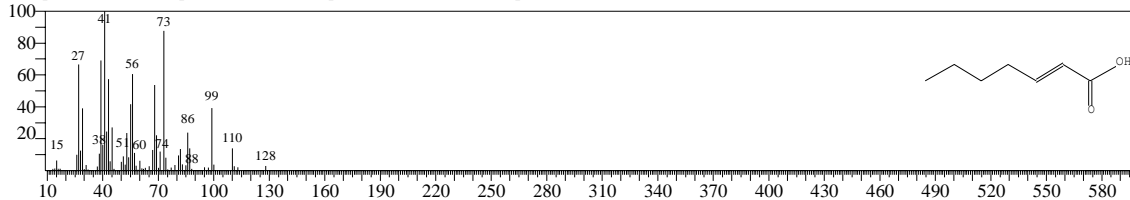

<<Target >>

Line#:4 R.Time:10.850(Scan#:502) MassPeaks:405  
RawMode:Averaged 10.833-10.867(501-503) BasePeak:110.10(529944)  
BG Mode:Calc. from Peak Group 1 - Event 1 Scan

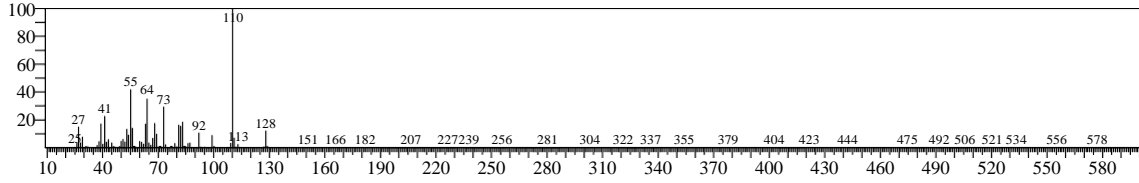

Hit#:1 Entry:3235 Library:NIST20R.lib  
SI:81 Formula:C6H6O2 CAS:120-80-9 MolWeight:110 RetIndex:1122  
CompName:Catechol \$\$ 1,2-Benzenediol \$\$ Pyrocatechol \$\$ o-Benzenediol \$\$ o-Dihydroxybenzene \$\$ o-Dioxybenzene \$\$ o-Hydroxyphenol \$\$ o-Phenyl

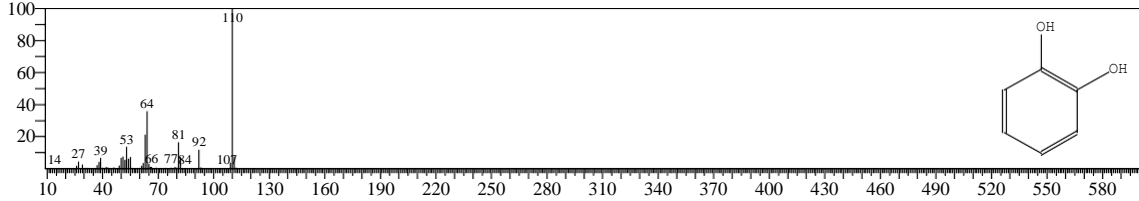

Hit#:2 Entry:3234 Library:NIST20R.lib  
SI:80 Formula:C6H6O2 CAS:120-80-9 MolWeight:110 RetIndex:1122  
CompName:Catechol \$\$ 1,2-Benzenediol \$\$ Pyrocatechol \$\$ o-Benzenediol \$\$ o-Dihydroxybenzene \$\$ o-Dioxybenzene \$\$ o-Hydroxyphenol \$\$ o-Phenyl

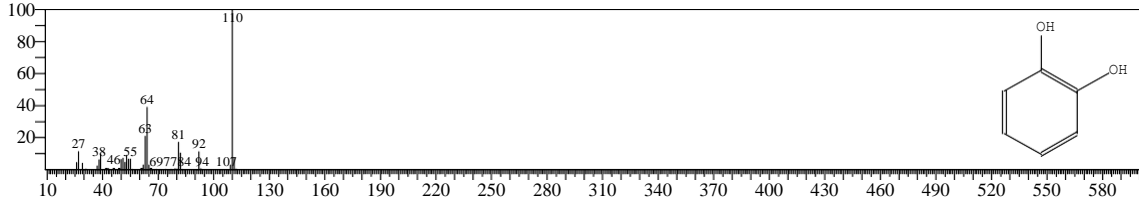

Hit#:3 Entry:3218 Library:NIST20R.lib  
SI:79 Formula:C6H6O2 CAS:108-46-3 MolWeight:110 RetIndex:1122  
CompName:Resorcinol \$\$ 1,3-Benzenediol \$\$ .alpha.-Resorcinol \$\$ m-Benzenediol \$\$ m-Dihydroxybenzene \$\$ m-Dioxybenzene \$\$ m-Hydroquinone \$\$

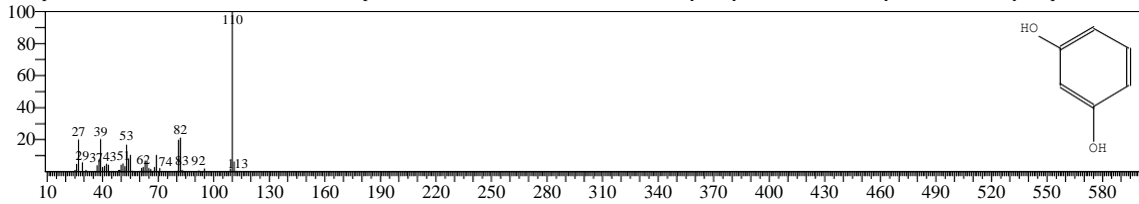

Hit#:4 Entry:3230 Library:NIST20R.lib  
SI:79 Formula:C6H6O2 CAS:123-31-9 MolWeight:110 RetIndex:1122  
CompName:Hydroquinone \$\$ 1,4-Benzenediol \$\$ p-Benzenediol \$\$ p-Dihydroxybenzene \$\$ p-Dioxybenzene \$\$ p-Hydroquinone \$\$ p-Hydroxyphenol \$\$

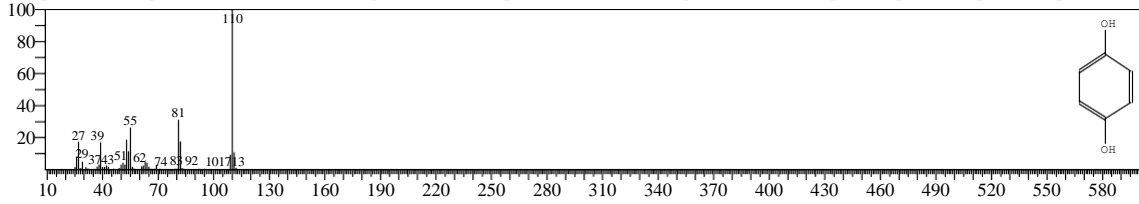

Hit#:5 Entry:3219 Library:NIST20R.lib  
SI:78 Formula:C6H6O2 CAS:108-46-3 MolWeight:110 RetIndex:1122  
CompName:Resorcinol \$\$ 1,3-Benzenediol \$\$ .alpha.-Resorcinol \$\$ m-Benzenediol \$\$ m-Dihydroxybenzene \$\$ m-Dioxybenzene \$\$ m-Hydroquinone \$\$

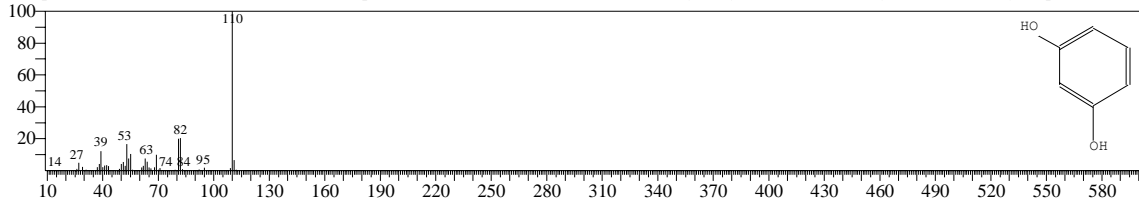

<< Target >>

Line#:5 R.Time:11.317(Scan#:530) MassPeaks:270  
RawMode:Averaged 11.300-11.333(529-531) BasePeak:60.05(86420)  
BG Mode:Calc. from Peak Group 1 - Event 1 Scan

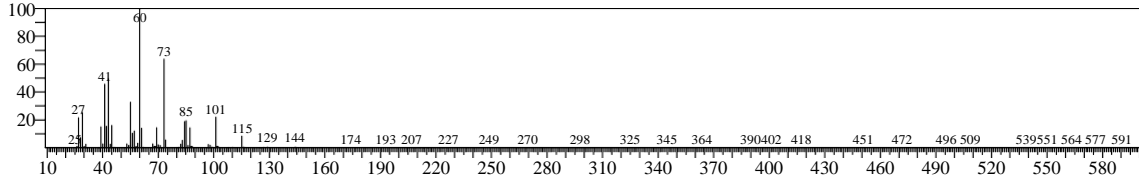

Hit#:1 Entry:14424 Library:NIST20M1.lib  
SI:97 Formula:C8H16O2 CAS:124-07-2 MolWeight:144 RetIndex:1173  
CompName:Octanoic acid \$ n-Caprylic acid \$ n-Octanoic acid \$ n-Octoic acid \$ n-Octylic acid \$ Neo-Fat 8 \$ Caprylic acid \$ Enantic acid \$ Octyl

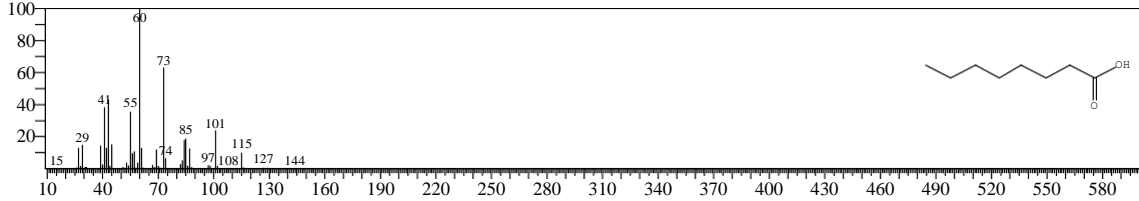

Hit#:2 Entry:9790 Library:NIST20R.lib  
SI:95 Formula:C8H16O2 CAS:124-07-2 MolWeight:144 RetIndex:1173  
CompName:Octanoic acid \$ n-Caprylic acid \$ n-Octanoic acid \$ n-Octoic acid \$ n-Octylic acid \$ Neo-Fat 8 \$ Caprylic acid \$ Enantic acid \$ Octyl

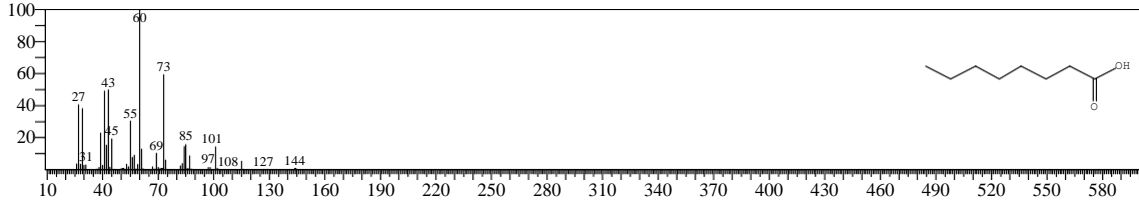

Hit#:3 Entry:9791 Library:NIST20R.lib  
SI:94 Formula:C8H16O2 CAS:124-07-2 MolWeight:144 RetIndex:1173  
CompName:Octanoic acid \$ n-Caprylic acid \$ n-Octanoic acid \$ n-Octoic acid \$ n-Octylic acid \$ Neo-Fat 8 \$ Caprylic acid \$ Enantic acid \$ Octyl

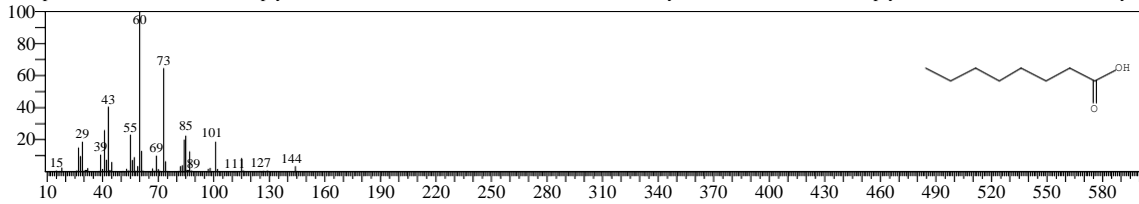

Hit#:4 Entry:9792 Library:NIST20R.lib  
SI:93 Formula:C8H16O2 CAS:124-07-2 MolWeight:144 RetIndex:1173  
CompName:Octanoic acid \$ n-Caprylic acid \$ n-Octanoic acid \$ n-Octoic acid \$ n-Octylic acid \$ Neo-Fat 8 \$ Caprylic acid \$ Enantic acid \$ Octyl

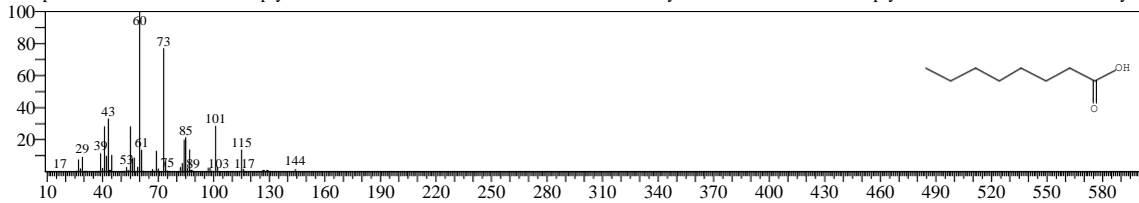

Hit#:5 Entry:13187 Library:NIST20R.lib  
SI:90 Formula:C9H18O2 CAS:112-05-0 MolWeight:158 RetIndex:1272  
CompName:Nonanoic acid \$ n-Nonanoic acid \$ n-Nonoic acid \$ n-Nonylic acid \$ Nonoic acid \$ Nonylic acid \$ Pelargic acid \$ Pelargonic acid \$

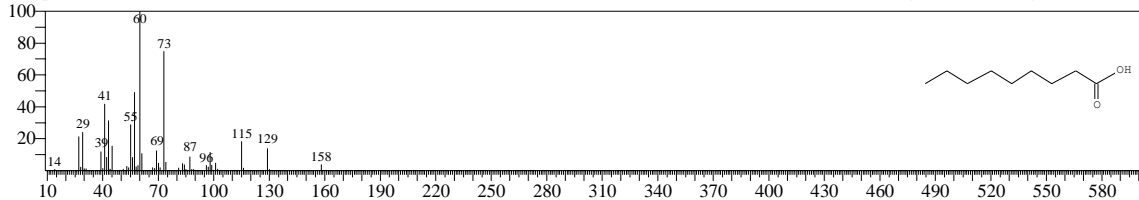

<<Target >>

Line#:6 R.Time:13.150(Scan#:640) MassPeaks:423  
RawMode:Averaged 13.133-13.167(639-641) BasePeak:110.10(1845796)  
BG Mode:Calc. from Peak Group 1 - Event 1 Scan

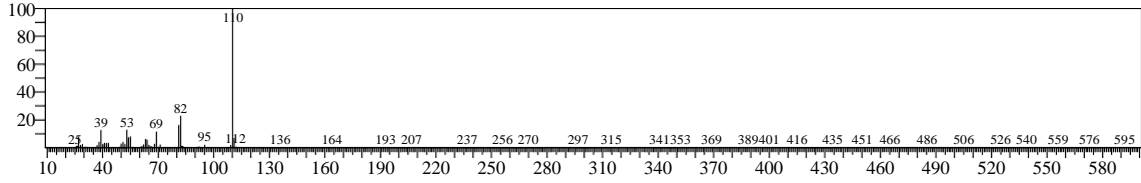

Hit#:1 Entry:3219 Library:NIST20R.lib

SI:97 Formula:C6H6O2 CAS:108-46-3 MolWeight:110 RetIndex:1122

CompName:Resorcinol \$\$ 1,3-Benzenediol \$\$ .alpha.-Resorcinol \$\$ m-Benzenediol \$\$ m-Dihydroxybenzene \$\$ m-Dioxybenzene \$\$ m-Hydroquinone \$\$

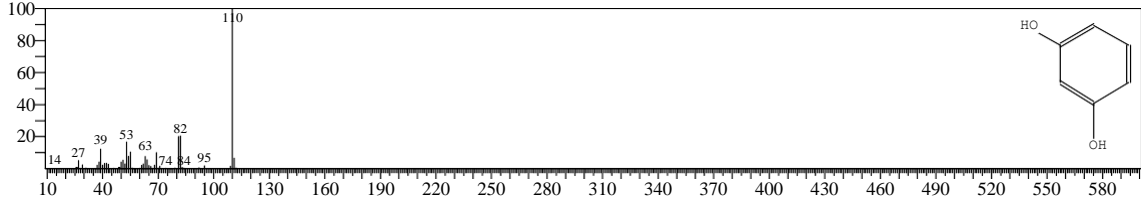

Hit#:2 Entry:3218 Library:NIST20R.lib

SI:94 Formula:C6H6O2 CAS:108-46-3 MolWeight:110 RetIndex:1122

CompName:Resorcinol \$\$ 1,3-Benzenediol \$\$ .alpha.-Resorcinol \$\$ m-Benzenediol \$\$ m-Dihydroxybenzene \$\$ m-Dioxybenzene \$\$ m-Hydroquinone \$\$

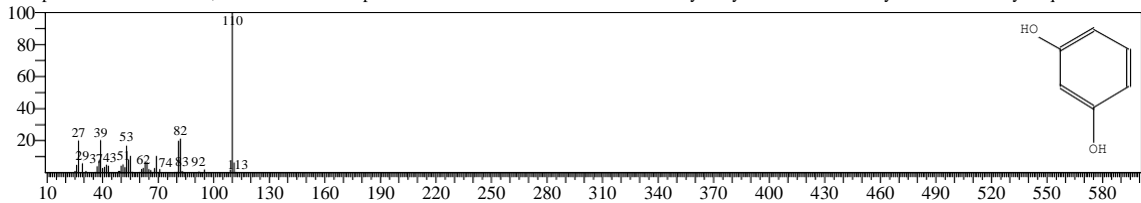

Hit#:3 Entry:3258 Library:NIST20M1.lib

SI:94 Formula:C6H6O2 CAS:108-46-3 MolWeight:110 RetIndex:1122

CompName:Resorcinol \$\$ 1,3-Benzenediol \$\$ .alpha.-Resorcinol \$\$ m-Benzenediol \$\$ m-Dihydroxybenzene \$\$ m-Dioxybenzene \$\$ m-Hydroquinone \$\$

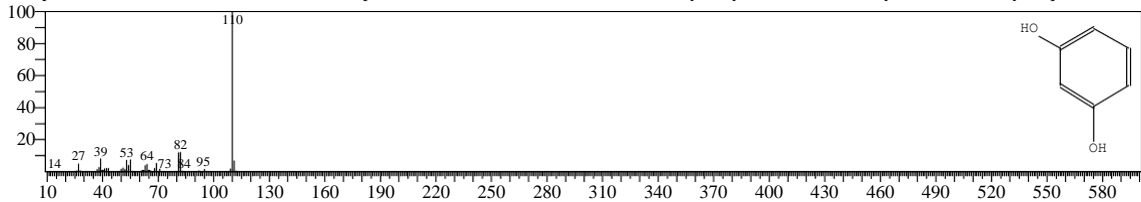

Hit#:4 Entry:3231 Library:NIST20R.lib

SI:92 Formula:C6H6O2 CAS:123-31-9 MolWeight:110 RetIndex:1122

CompName:Hydroquinone \$\$ 1,4-Benzenediol \$\$ p-Benzenediol \$\$ p-Dihydroxybenzene \$\$ p-Dioxybenzene \$\$ p-Hydroquinone \$\$ p-Hydroxyphenol \$\$

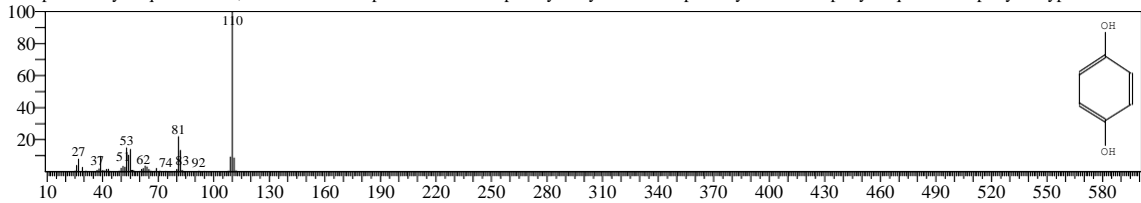

Hit#:5 Entry:3220 Library:NIST20R.lib

SI:91 Formula:C6H6O2 CAS:108-46-3 MolWeight:110 RetIndex:1122

CompName:Resorcinol \$\$ 1,3-Benzenediol \$\$ .alpha.-Resorcinol \$\$ m-Benzenediol \$\$ m-Dihydroxybenzene \$\$ m-Dioxybenzene \$\$ m-Hydroquinone \$\$

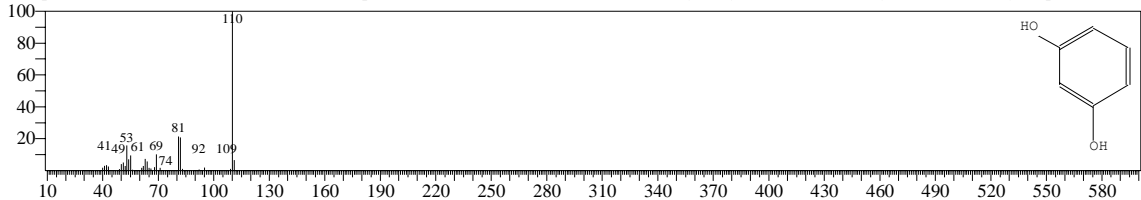

<<Target >>

Line#:7 R.Time:14.350(Scan#:712) MassPeaks:367

RawMode:Averaged 14.333-14.367(711-713) BasePeak:154.05(470494)

BG Mode:Calc. from Peak Group 1 - Event 1 Scan

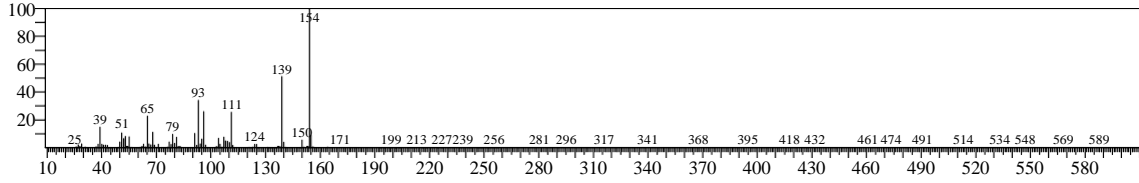

Hit#:1 Entry:12178 Library:NIST20R.lib

SI:93 Formula:C8H10O3 CAS:91-10-1 MolWeight:154 RetIndex:1279

CompName:Phenol, 2,6-dimethoxy- \$\$ Pyrogallol 1,3-dimethyl ether \$\$ Syringol \$\$ 1,3-Dimethoxy-2-hydroxybenzene \$\$ 2-Hydroxy-1,3-dimethoxybenzene

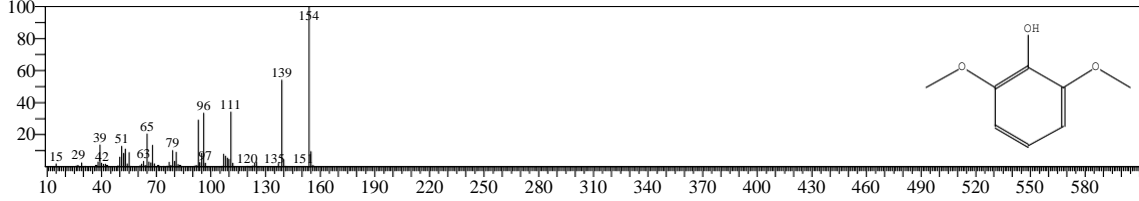

Hit#:2 Entry:12179 Library:NIST20R.lib

SI:91 Formula:C8H10O3 CAS:91-10-1 MolWeight:154 RetIndex:1279

CompName:Phenol, 2,6-dimethoxy- \$\$ Pyrogallol 1,3-dimethyl ether \$\$ Syringol \$\$ 1,3-Dimethoxy-2-hydroxybenzene \$\$ 2-Hydroxy-1,3-dimethoxybenzene

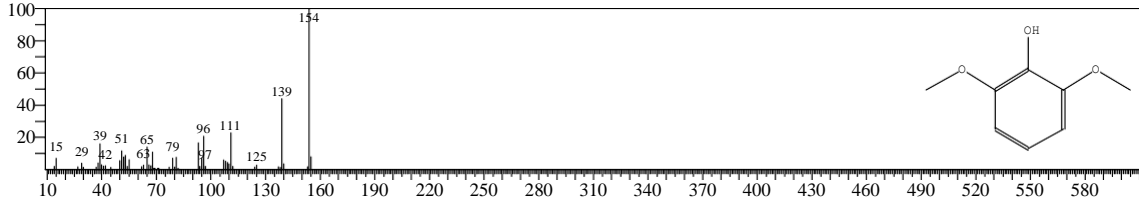

Hit#:3 Entry:19192 Library:NIST20M1.lib

SI:91 Formula:C8H10O3 CAS:91-10-1 MolWeight:154 RetIndex:1279

CompName:Phenol, 2,6-dimethoxy- \$\$ Pyrogallol 1,3-dimethyl ether \$\$ Syringol \$\$ 1,3-Dimethoxy-2-hydroxybenzene \$\$ 2-Hydroxy-1,3-dimethoxybenzene

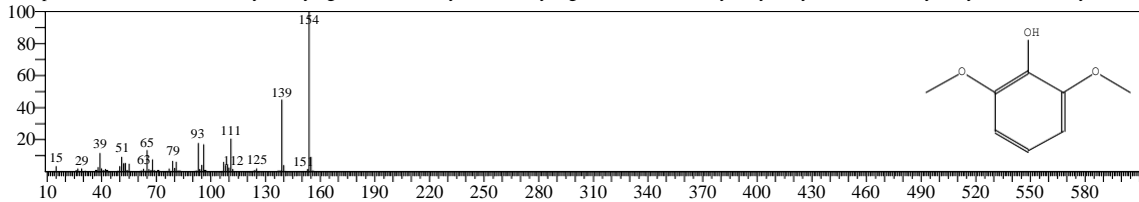

Hit#:4 Entry:19211 Library:NIST20M1.lib

SI:89 Formula:C8H10O3 CAS:5150-42-5 MolWeight:154 RetIndex:1279

CompName:2,3-Dimethoxyphenol \$\$ Phenol, 2,3-dimethoxy- \$\$ 1-Hydroxy-2,3-dimethoxybenzene

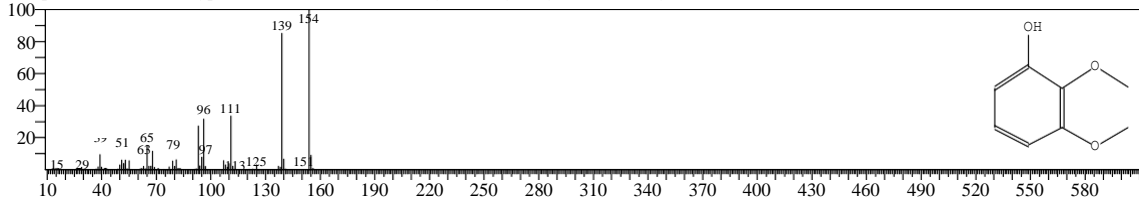

Hit#:5 Entry:12185 Library:NIST20R.lib

SI:85 Formula:C8H10O3 CAS:2033-89-8 MolWeight:154 RetIndex:1279

CompName:Phenol, 3,4-dimethoxy- \$\$ 3,4-Dimethoxyphenol

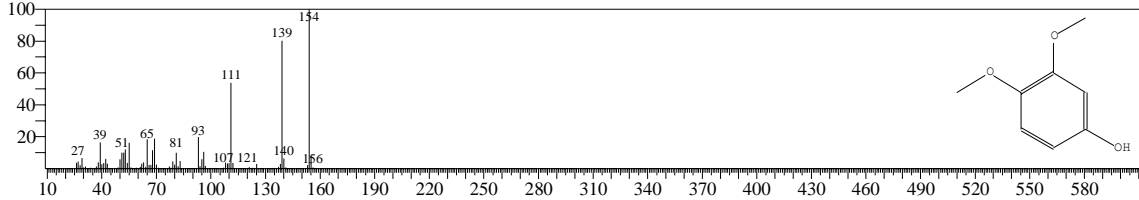

<<Target >>

Line#:8 R.Time:14.450(Scan#:718) MassPeaks:289  
RawMode:Averaged 14.433-14.467(717-719) BasePeak:91.10(41635)  
BG Mode:Calc. from Peak Group 1 - Event 1 Scan

After the flowers have

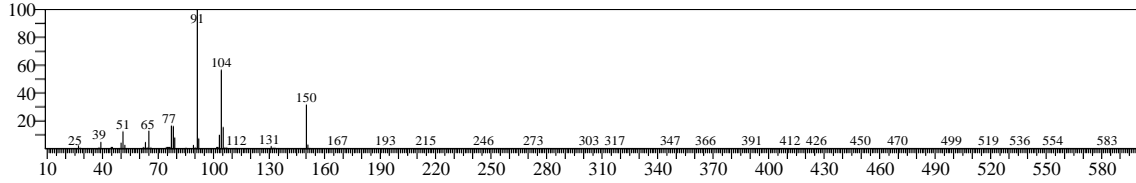

Hit#:1 Entry:16997 Library:NIST20M1.lib  
SI:96 Formula:C9H10O2 CAS:501-52-0 MolWeight:150 RetIndex:1349  
CompName:Hydrocinnamic acid \$\$ Benzenepropanoic acid \$\$ .beta.-Phenylpropionic acid \$\$ Benzenepropionic acid \$\$ Benzylacetic acid \$\$ Dihydrocinn

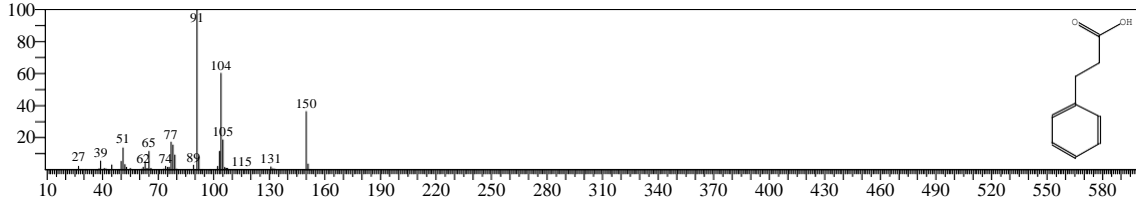

Hit#:2 Entry:11031 Library:NIST20R.lib  
SI:95 Formula:C9H10O2 CAS:501-52-0 MolWeight:150 RetIndex:1349  
CompName:Hydrocinnamic acid \$\$ Benzenepropanoic acid \$\$ .beta.-Phenylpropionic acid \$\$ Benzenepropionic acid \$\$ Benzylacetic acid \$\$ Dihydrocinn

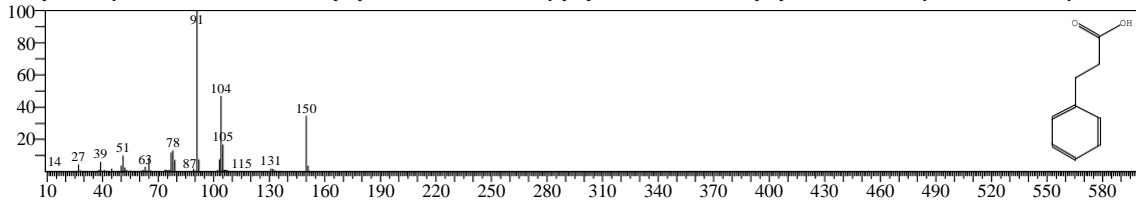

Hit#:3 Entry:11032 Library:NIST20R.lib  
SI:95 Formula:C9H10O2 CAS:501-52-0 MolWeight:150 RetIndex:1349  
CompName:Hydrocinnamic acid \$\$ Benzenepropanoic acid \$\$ .beta.-Phenylpropionic acid \$\$ Benzenepropionic acid \$\$ Benzylacetic acid \$\$ Dihydrocinn

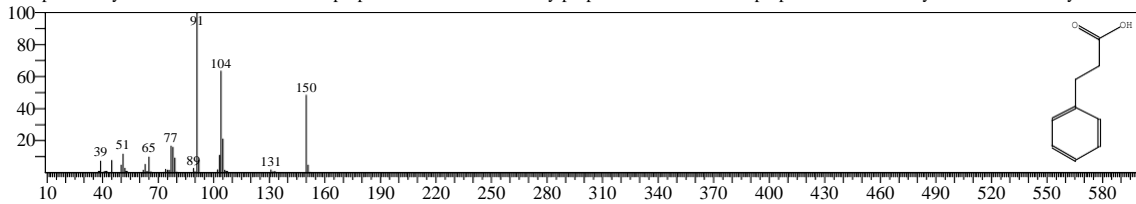

Hit#:4 Entry:11030 Library:NIST20R.lib  
SI:95 Formula:C9H10O2 CAS:501-52-0 MolWeight:150 RetIndex:1349  
CompName:Hydrocinnamic acid \$\$ Benzenepropanoic acid \$\$ .beta.-Phenylpropionic acid \$\$ Benzenepropionic acid \$\$ Benzylacetic acid \$\$ Dihydrocinn

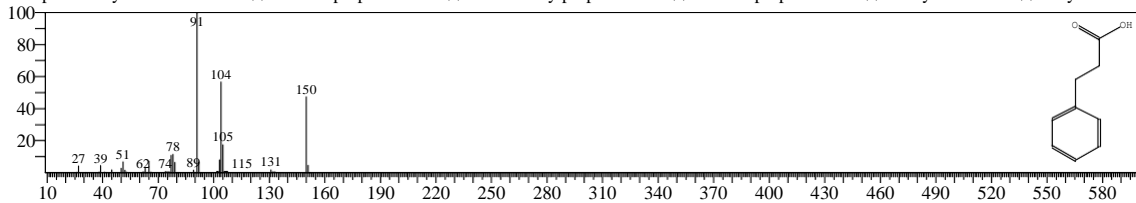

Hit#:5 Entry:11029 Library:NIST20R.lib  
SI:93 Formula:C9H10O2 CAS:501-52-0 MolWeight:150 RetIndex:1349  
CompName:Hydrocinnamic acid \$\$ Benzenepropanoic acid \$\$ .beta.-Phenylpropionic acid \$\$ Benzenepropionic acid \$\$ Benzylacetic acid \$\$ Dihydrocinn

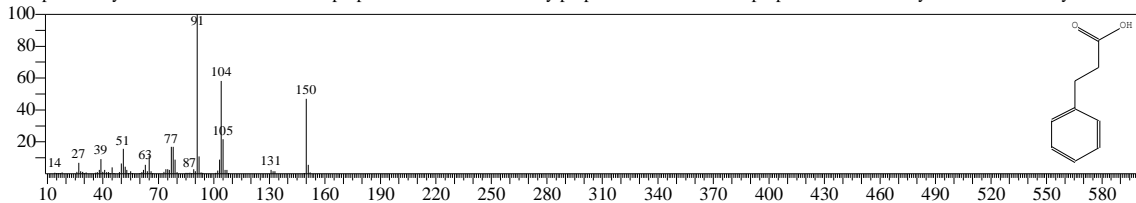

<<Target >>

Line#:9 R.Time:14.617(Scan#:728) MassPeaks:303  
RawMode:Averaged 14.600-14.633(727-729) BasePeak:73.05(22314)  
BG Mode:Calc. from Peak Group 1 - Event 1 Scan

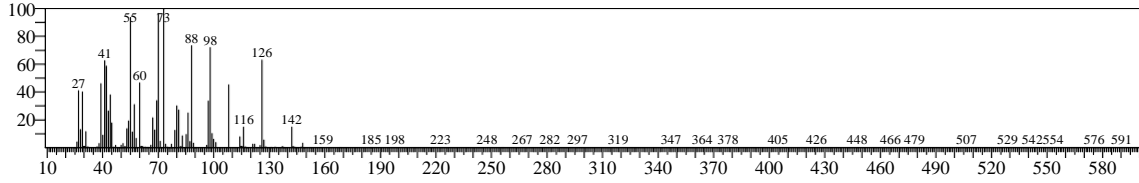

Hit#:1 Entry:14216 Library:NIST20M1.lib  
SI:91 Formula:C7H12O3 CAS:3685-26-5 MolWeight:144 RetIndex:1325  
CompName:trans-4-Hydroxycyclohexanecarboxylic acid

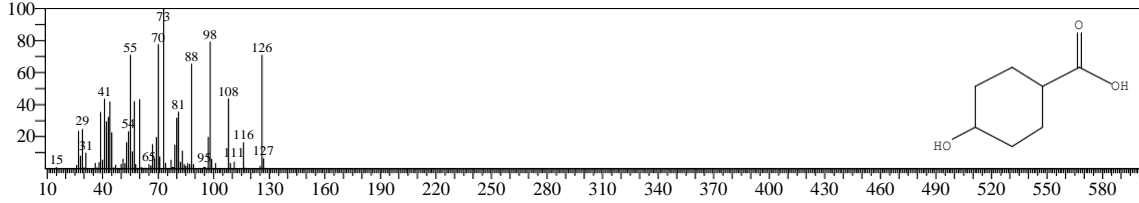

Hit#:2 Entry:14215 Library:NIST20M1.lib  
SI:87 Formula:C7H12O3 CAS:3685-22-1 MolWeight:144 RetIndex:1325  
CompName:cis-4-Hydroxycyclohexanecarboxylic acid

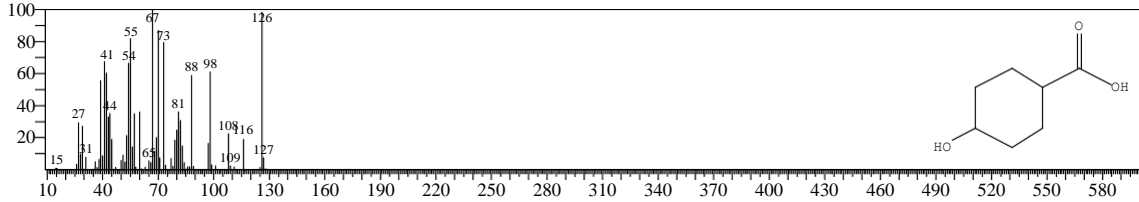

Hit#:3 Entry:14217 Library:NIST20M1.lib  
SI:84 Formula:C7H12O3 CAS:17419-81-7 MolWeight:144 RetIndex:1325  
CompName:4-Hydroxycyclohexanecarboxylic acid,c&t

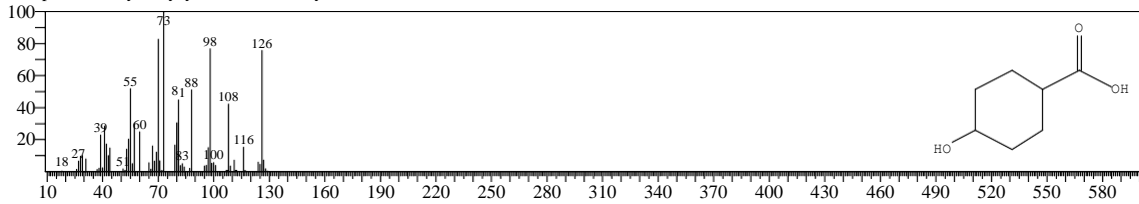

Hit#:4 Entry:4911 Library:NIST20M1.lib  
SI:76 Formula:C6H12O2 CAS:823-18-7 MolWeight:116 RetIndex:1096  
CompName:1,3-Cyclohexanediol, cis- \$ cis-1,3-Cyclohexanediol \$ 1,3-Cyclohexanediol, (Z)- \$ cis-1,3-Cyclohexandiol

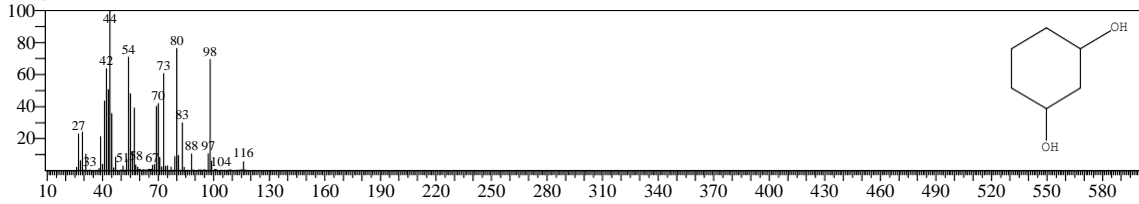

Hit#:5 Entry:4893 Library:NIST20M1.lib  
SI:75 Formula:C6H12O2 CAS:73959-42-9 MolWeight:116 RetIndex:999  
CompName:1-(1-Hydroxyethyl)-1-(hydroxymethyl)cyclopropane \$ 1-[1-(Hydroxymethyl)cyclopropyl]ethanol #

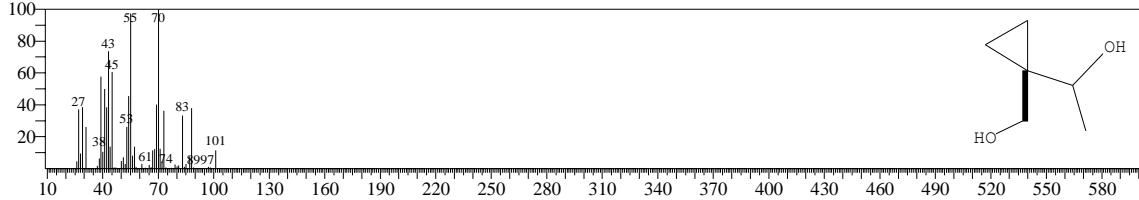



<< Target >>

Line#:10 R.Time:15.167(Scan#:761) MassPeaks:334  
RawMode:Averaged 15.150-15.183(760-762) BasePeak:92.10(42013)  
BG Mode:Calc. from Peak Group 1 - Event 1 Scan

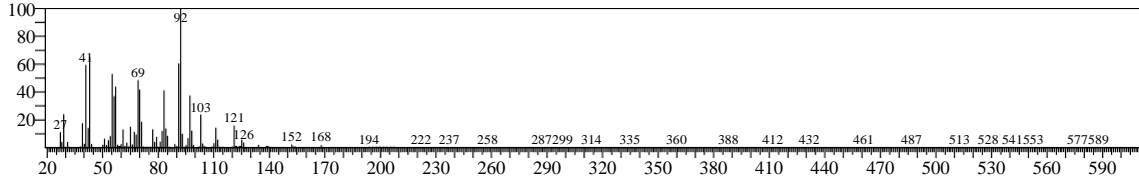

Hit#:1 Entry:147133 Library:NIST20M1.lib  
SI:83 Formula:C17H34O3 CAS:0-00-0 MolWeight:286 RetIndex:1954  
CompName:Carbonic acid, ethyl tetradecyl ester

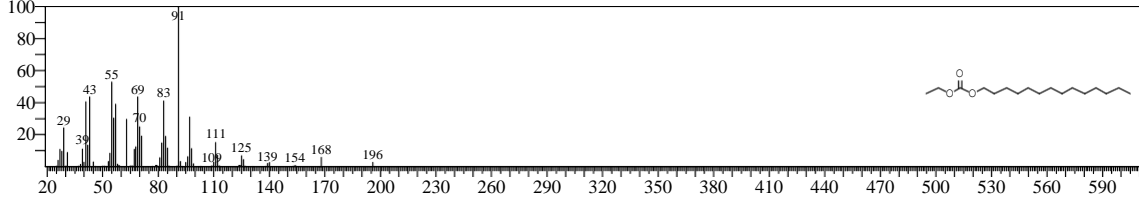

Hit#:2 Entry:114264 Library:NIST20M1.lib  
SI:83 Formula:C15H30O3 CAS:0-00-0 MolWeight:258 RetIndex:1755  
CompName:Carbonic acid, dodecyl ethyl ester

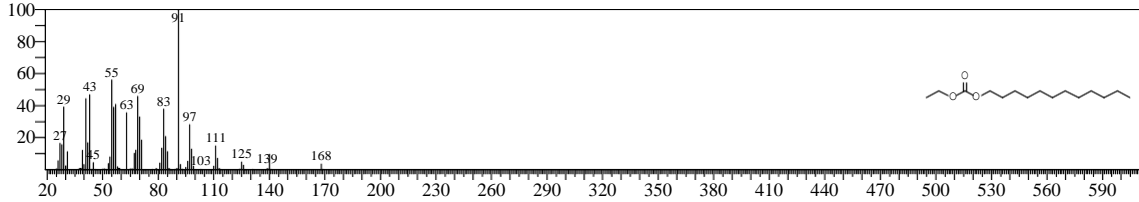

Hit#:3 Entry:83487 Library:NIST20M1.lib  
SI:83 Formula:C13H26O3 CAS:0-00-0 MolWeight:230 RetIndex:1557  
CompName:Carbonic acid, decyl ethyl ester

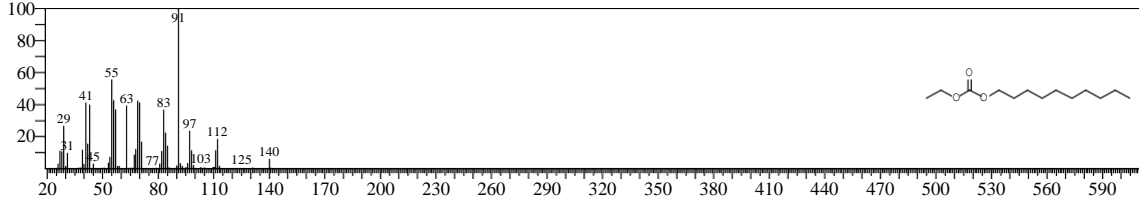

Hit#:4 Entry:130578 Library:NIST20M1.lib  
SI:83 Formula:C16H32O3 CAS:0-00-0 MolWeight:272 RetIndex:1855  
CompName:Carbonic acid, ethyl tridecyl ester

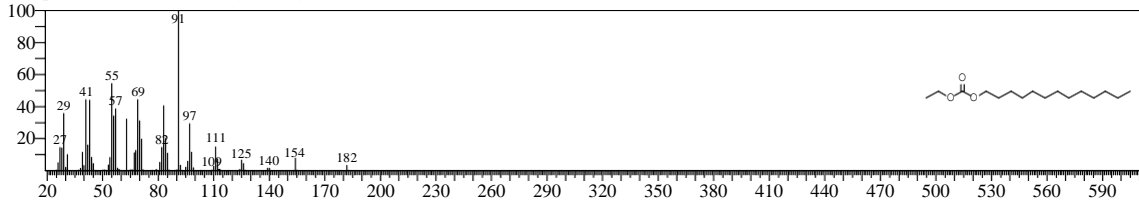

Hit#:5 Entry:168308 Library:NIST20M1.lib  
SI:80 Formula:C17H33ClO2 CAS:0-00-0 MolWeight:304 RetIndex:2039  
CompName:3-Chloropropionic acid, 3-tetradecyl ester \$S 1-Ethyl dodecyl 3-chloropropanoate #

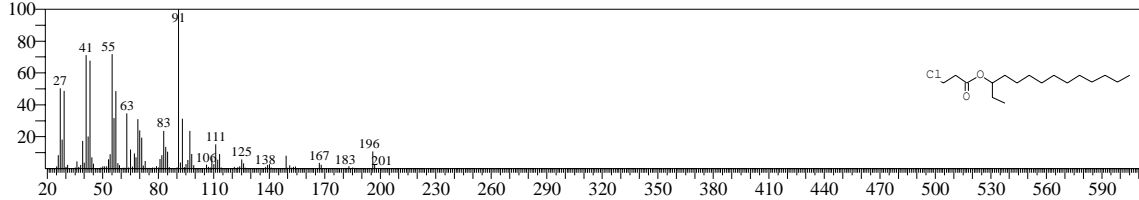

<<Target >>

Line#:11 R.Time:16.867(Scan#:863) MassPeaks:340  
RawMode:Averaged 16.850-16.883(862-864) BasePeak:123.10(21938)  
BG Mode:Calc. from Peak Group 1 - Event 1 Scan

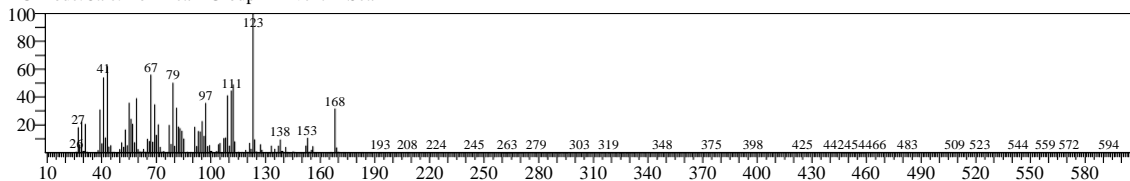

Hit#:1 Entry:28082 Library:NIST20M1.lib  
SI:78 Formula:C10H16O2 CAS:0-00-0 MolWeight:168 RetIndex:1351  
CompName:2-Ethyl-1,3-dimethylcyclopent-2-enecarboxylic acid \$\$ 2-Ethyl-1,3-dimethyl-2-cyclopentene-1-carboxylic acid #

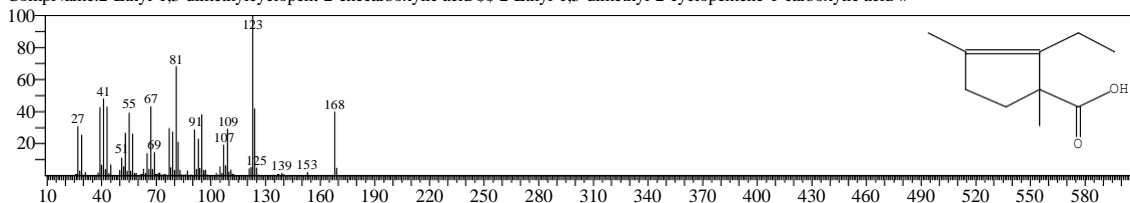

Hit#:2 Entry:205575 Library:NIST20M1.lib  
SI:78 Formula:C22H40O2 CAS:69502-96-1 MolWeight:336 RetIndex:2453  
CompName:2H-Pyran, 2-(2-heptadecyloxy)tetrahydro- \$\$ 2-(2-Heptadecyloxy)tetrahydro-2H-pyran #

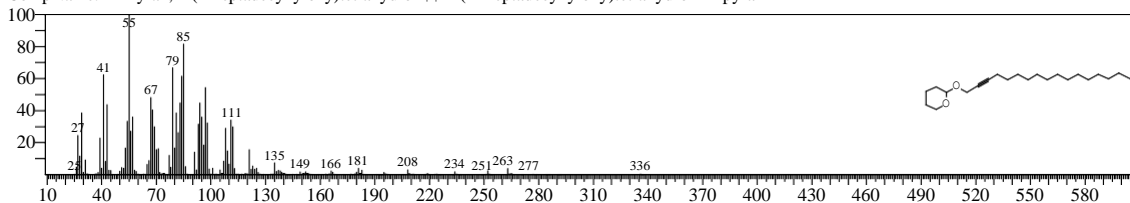

Hit#:3 Entry:28275 Library:NIST20M1.lib  
SI:78 Formula:C10H16O2 CAS:705-16-8 MolWeight:168 RetIndex:1256  
CompName:dl-trans-Chrysanthemic acid \$\$ Cyclopropanecarboxylic acid, 2,2-dimethyl-3-(2-methyl-1-propenyl)-, trans-(+/-)- \$\$ (+/-)-trans-Chrysanthem

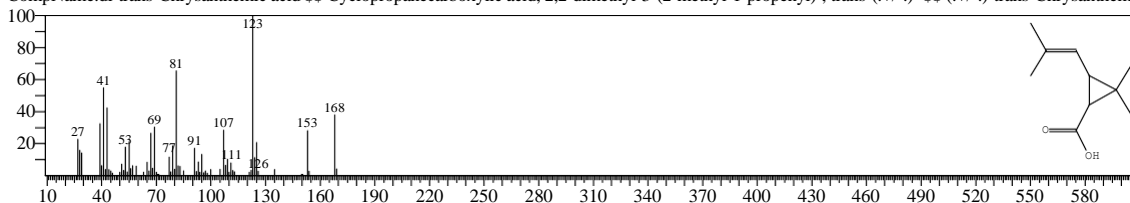

Hit#:4 Entry:28277 Library:NIST20M1.lib  
SI:77 Formula:C10H16O2 CAS:10453-89-1 MolWeight:168 RetIndex:1256  
CompName:Chrysanthemic acid \$\$ Cyclopropanecarboxylic acid, 2,2-dimethyl-3-(2-methyl-1-propenyl)- \$\$ Cyclopropanecarboxylic acid, 2,2-dimethyl-3-

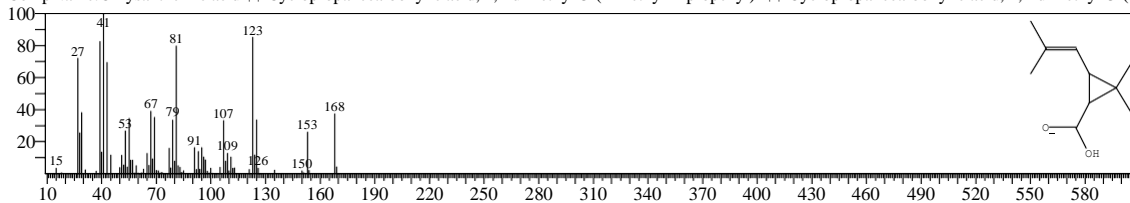

Hit#:5 Entry:12305 Library:NIST20R.lib  
SI:77 Formula:C10H18O CAS:18383-58-9 MolWeight:154 RetIndex:1143  
CompName:trans-Chrysanthemol \$\$ [2,2-Dimethyl-3-(2-methyl-1-propenyl)cyclopropyl]methanol #

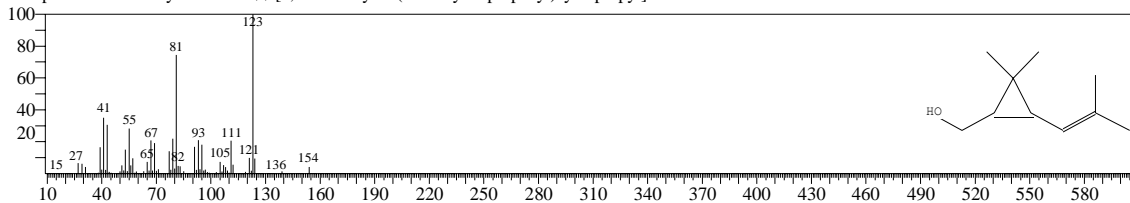

<<Target >>

Line#:12 R.Time:18.150(Scan#:940) MassPeaks:319  
RawMode:Averaged 18.133-18.167(939-941) BasePeak:107.10(38967)  
BG Mode:Calc. from Peak Group 1 - Event 1 Scan

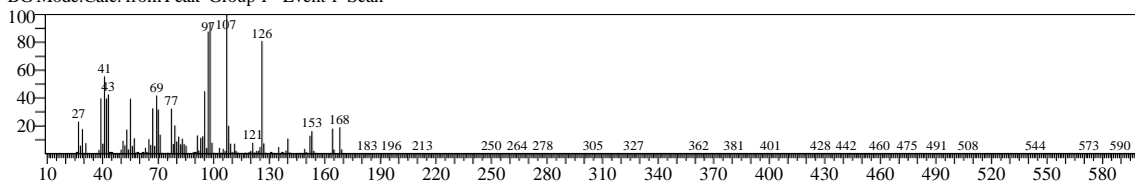

Hit#:1 Entry:28134 Library:NIST20M1.lib  
SI:86 Formula:C10H16O2 CAS:55955-54-9 MolWeight:168 RetIndex:1401  
CompName:2-Cyclohexen-1-one, 3-(hydroxymethyl)-6-(1-methylethyl)- \$ 3-(Hydroxymethyl)-6-isopropyl-2-cyclohexen-1-one #

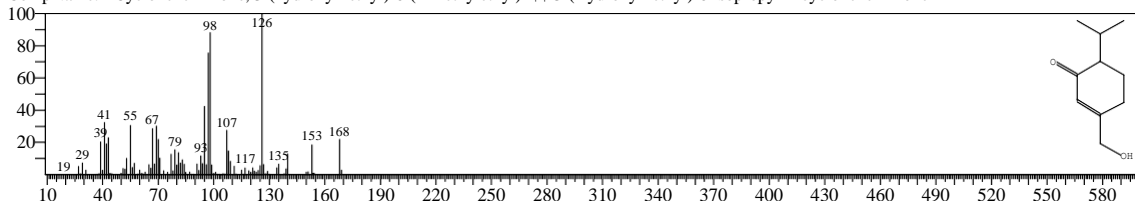

Hit#:2 Entry:15631 Library:NIST20R.lib  
SI:83 Formula:C10H16O2 CAS:55955-54-9 MolWeight:168 RetIndex:1401  
CompName:2-Cyclohexen-1-one, 3-(hydroxymethyl)-6-(1-methylethyl)- \$ 3-(Hydroxymethyl)-6-isopropyl-2-cyclohexen-1-one #

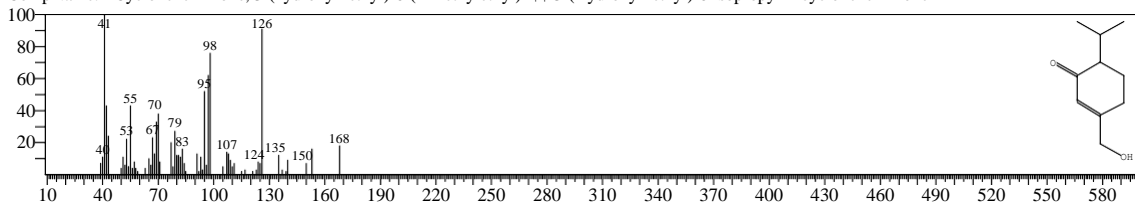

Hit#:3 Entry:28204 Library:NIST20M1.lib  
SI:77 Formula:C10H16O2 CAS:490-03-9 MolWeight:168 RetIndex:1288  
CompName:2-Cyclohexen-1-one, 2-hydroxy-3-methyl-6-(1-methylethyl)- \$ Diosphenol \$ Barosma camphor \$ Buccocamphor \$ Buchu camphor \$ 2-H

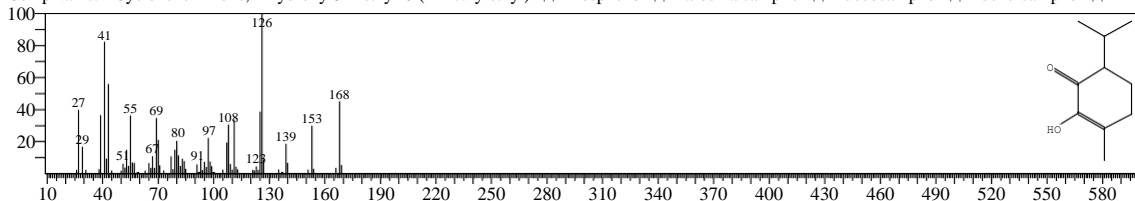

Hit#:4 Entry:5917 Library:NIST20R.lib  
SI:77 Formula:C8H14O CAS:645-62-5 MolWeight:126 RetIndex:990  
CompName:2-Hexenal, 2-ethyl- \$ .alpha.-Ethyl-.beta.-propylacrolein \$ 2-Ethyl-2-hexen-1-al \$ 2-Ethyl-2-hexenal \$ 2-Ethyl-3-propylacrolein \$ .alpha.-

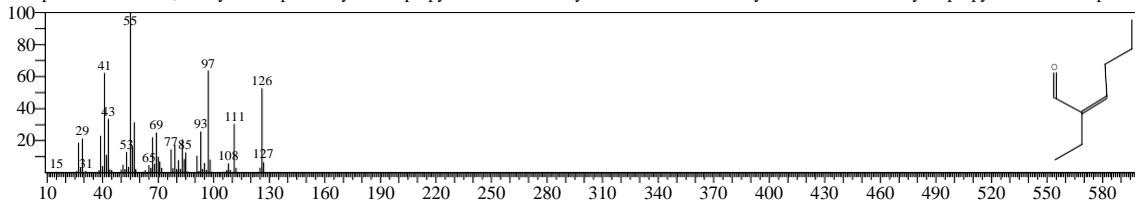

Hit#:5 Entry:28441 Library:NIST20M1.lib  
SI:76 Formula:C11H20O CAS:61203-83-6 MolWeight:168 RetIndex:1349  
CompName:4-Pentylcyclohexanone

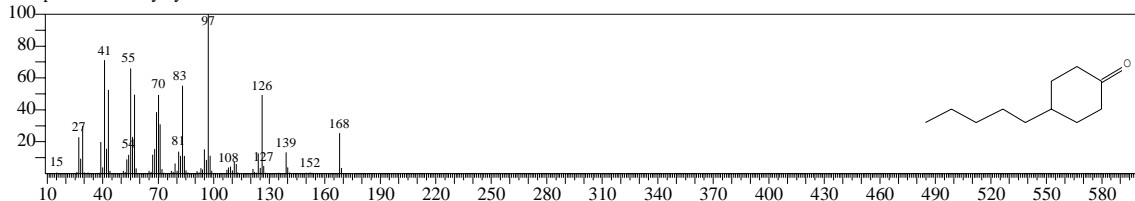

<<Target >>

Line#:13 R.Time:18.833(Scan#:981) MassPeaks:343  
RawMode:Averaged 18.817-18.850(980-982) BasePeak:43.10(101059)  
BG Mode:Calc. from Peak Group 1 - Event 1 Scan

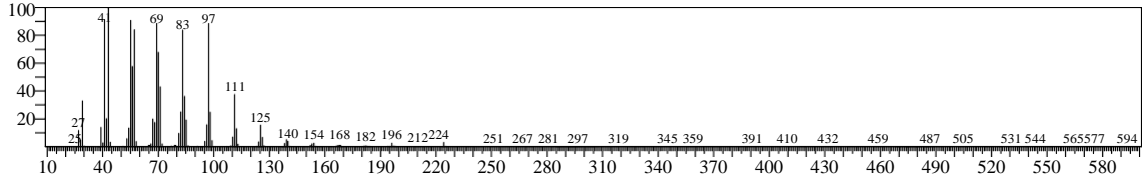

Hit#:1 Entry:24890 Library:NIST20R.lib  
SI:96 Formula:C15H30 CAS:13360-61-7 MolWeight:210 RetIndex:1502  
CompName:1-Pentadecene \$ Pentadecene, 1- \$ Pentadec-1-ene

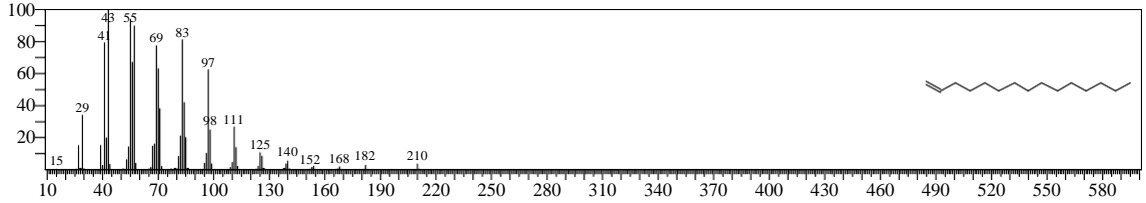

Hit#:2 Entry:29353 Library:NIST20R.lib  
SI:96 Formula:C17H34 CAS:6765-39-5 MolWeight:238 RetIndex:1701  
CompName:1-Heptadecene \$ Hexahydroaplotaxene \$ Heptadec-1-ene \$ NSC 77132 \$ Heptadecene (Related)

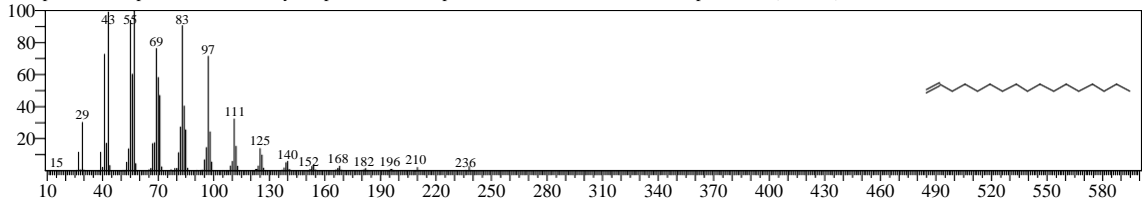

Hit#:3 Entry:107593 Library:NIST20M1.lib  
SI:96 Formula:C18H36 CAS:112-88-9 MolWeight:252 RetIndex:1801  
CompName:1-Octadecene \$ .alpha.-Octadecene \$ Octadecylene, .alpha.- \$ Neodene 18 \$ Octadec-1-ene \$ Octadecene-1 \$ Octadeca-1-ene

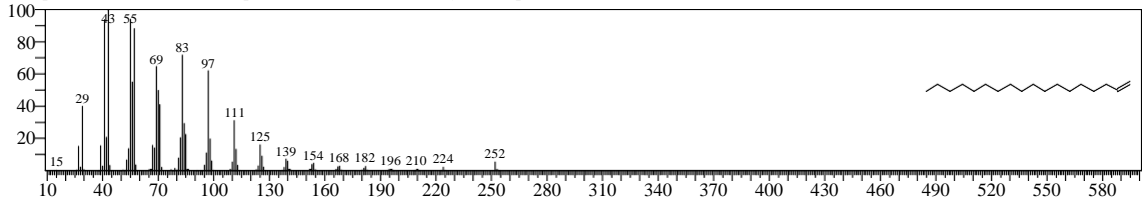

Hit#:4 Entry:107601 Library:NIST20M1.lib  
SI:96 Formula:C18H36 CAS:7206-19-1 MolWeight:252 RetIndex:1818  
CompName:3-Octadecene, (E)- \$ (3E)-3-Octadecene \$ (E)-3-Octadecene \$ trans-3-Octadecene

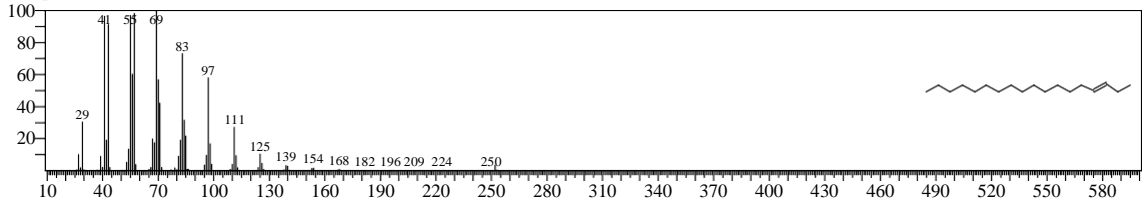

Hit#:5 Entry:27375 Library:NIST20R.lib  
SI:95 Formula:C16H32 CAS:629-73-2 MolWeight:224 RetIndex:1602  
CompName:Cetene \$ 1-Hexadecene \$ .alpha.-Hexadecene \$ n-Hexadec-1-ene \$ 1-Cetene \$ Hexadecylene-1 \$ Hexadec-1-ene \$ Hexadecene-1 \$ N

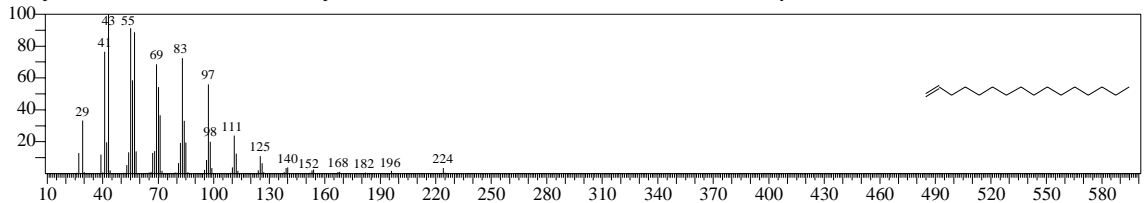

<<Target >>

Line#:14 R.Time:19.750(Scan#:1036) MassPeaks:376  
RawMode:Averaged 19.733-19.767(1035-1037) BasePeak:107.10(159234)  
BG Mode:Calc. from Peak Group 1 - Event 1 Scan

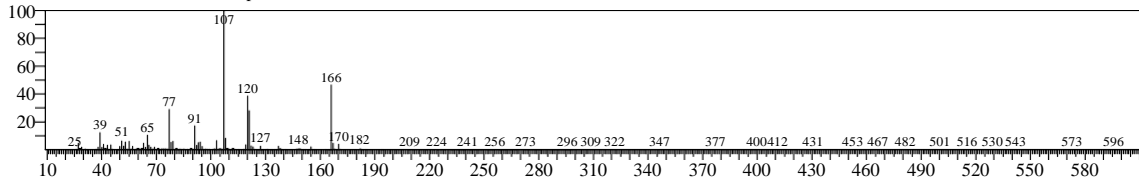

Hit#:1 Entry:15068 Library:NIST20R.lib  
SI:88 Formula:C9H10O3 CAS:501-97-3 MolWeight:166 RetIndex:1569  
CompName:Benzenepropanoic acid, 4-hydroxy- \$\$ Phloretic acid \$\$ Hydrocinnamic acid, p-hydroxy- \$\$ .beta.-(p-Hydroxyphenyl)propionic acid \$\$ p-Hydr

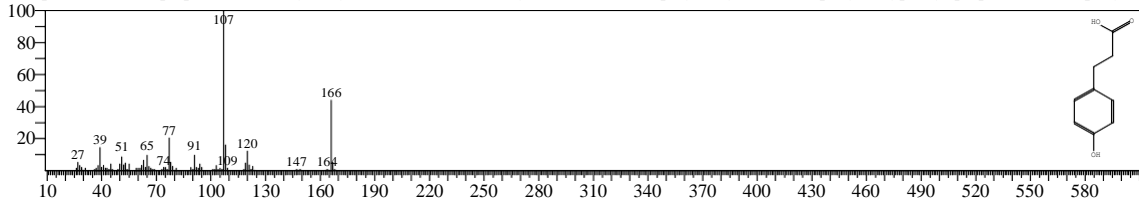

Hit#:2 Entry:15095 Library:NIST20R.lib  
SI:84 Formula:C9H10O3 CAS:621-54-5 MolWeight:166 RetIndex:1569  
CompName:3-(3-Hydroxyphenyl)propionic acid \$\$ .beta.-(m-Hydroxyphenyl)propionic acid \$\$ Benzenepropanoic acid, 3-hydroxy- \$\$ .beta.-(3-Hydroxyph

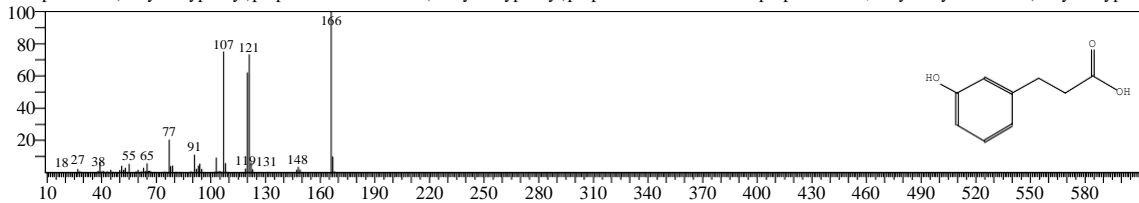

Hit#:3 Entry:26604 Library:NIST20M1.lib  
SI:81 Formula:C9H10O3 CAS:501-97-3 MolWeight:166 RetIndex:1569  
CompName:Benzenepropanoic acid, 4-hydroxy- \$\$ Phloretic acid \$\$ Hydrocinnamic acid, p-hydroxy- \$\$ .beta.-(p-Hydroxyphenyl)propionic acid \$\$ p-Hydr

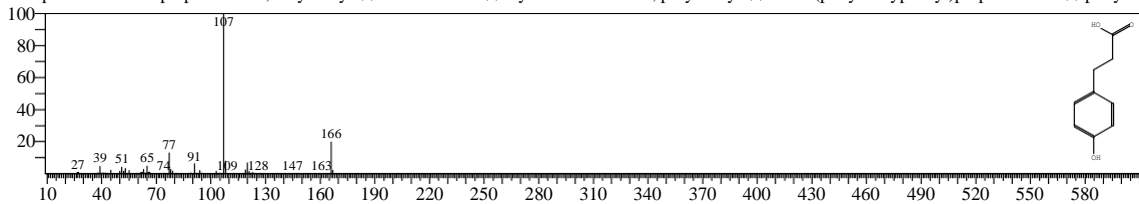

Hit#:4 Entry:15069 Library:NIST20R.lib  
SI:80 Formula:C9H10O3 CAS:501-97-3 MolWeight:166 RetIndex:1569  
CompName:Benzenepropanoic acid, 4-hydroxy- \$\$ Phloretic acid \$\$ Hydrocinnamic acid, p-hydroxy- \$\$ .beta.-(p-Hydroxyphenyl)propionic acid \$\$ p-Hydr

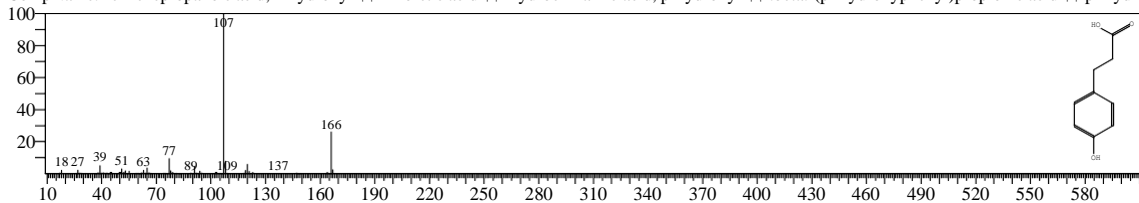

Hit#:5 Entry:15093 Library:NIST20R.lib  
SI:80 Formula:C9H10O3 CAS:1878-49-5 MolWeight:166 RetIndex:1439  
CompName:Acetic acid, (2-methylphenoxy)- \$\$ 2-Methylphenoxyacetic acid \$\$ ortho-Tolyloxyacetic acid \$\$ o-Methyl phenoxy acetic acid \$\$ Acetic acid, (

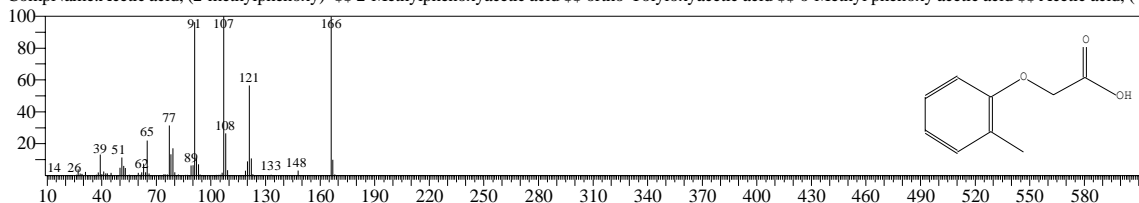

<<Target >>

Line#:15 R.Time:21.617(Scan#:1148) MassPeaks:332  
RawMode:Averaged 21.600-21.633(1147-1149) BasePeak:73.05(86063)  
BG Mode:Calc. from Peak Group 1 - Event 1 Scan

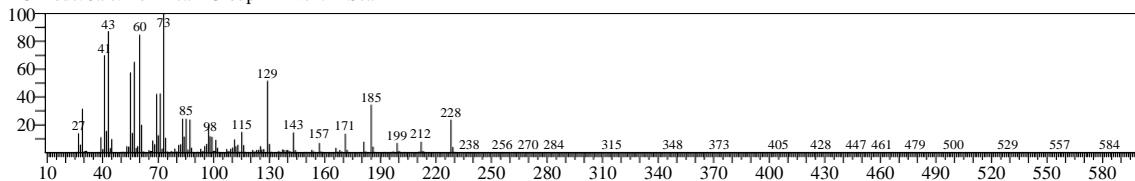

Hit#:1 Entry:81713 Library:NIST20M1.lib  
SI:95 Formula:C14H28O2 CAS:544-63-8 MolWeight:228 RetIndex:1769  
CompName:Tetradecanoic acid \$\$ Myristic acid \$\$ n-Tetradecanoic acid \$\$ n-Tetradecoic acid \$\$ Neo-Fat 14 \$\$ Univol U 316S \$\$ 1-Tridecanecarboxylic

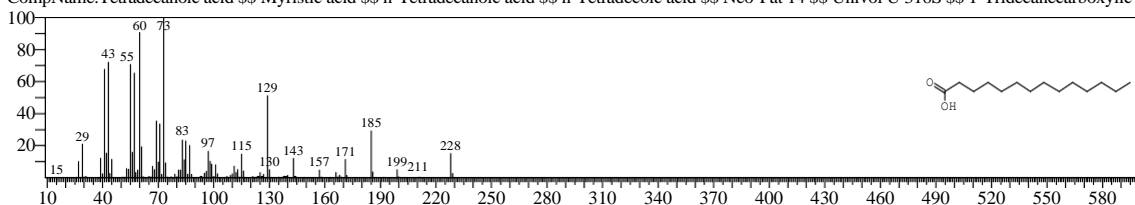

Hit#:2 Entry:28009 Library:NIST20R.lib  
SI:94 Formula:C14H28O2 CAS:544-63-8 MolWeight:228 RetIndex:1769  
CompName:Tetradecanoic acid \$\$ Myristic acid \$\$ n-Tetradecanoic acid \$\$ n-Tetradecoic acid \$\$ Neo-Fat 14 \$\$ Univol U 316S \$\$ 1-Tridecanecarboxylic

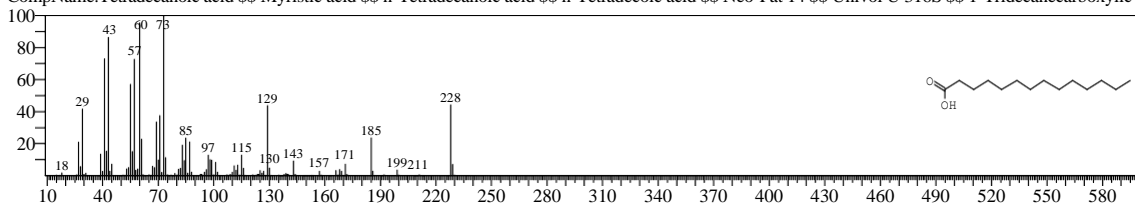

Hit#:3 Entry:28011 Library:NIST20R.lib  
SI:93 Formula:C14H28O2 CAS:544-63-8 MolWeight:228 RetIndex:1769  
CompName:Tetradecanoic acid \$\$ Myristic acid \$\$ n-Tetradecanoic acid \$\$ n-Tetradecoic acid \$\$ Neo-Fat 14 \$\$ Univol U 316S \$\$ 1-Tridecanecarboxylic

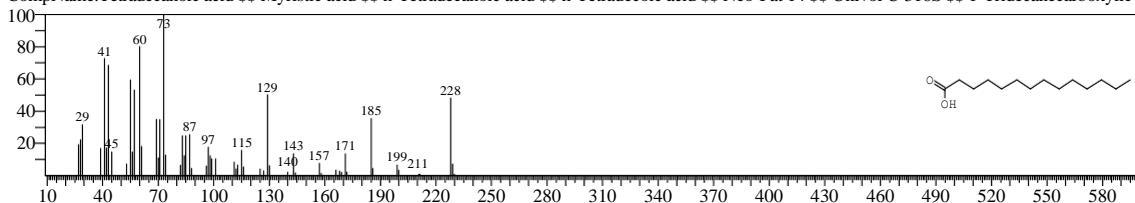

Hit#:4 Entry:96603 Library:NIST20M1.lib  
SI:93 Formula:C15H30O2 CAS:1002-84-2 MolWeight:242 RetIndex:1869  
CompName:Pentadecanoic acid \$\$ Pentadecylic acid \$\$ n-Pentadecanoic acid \$\$ n-Pentadecylic acid

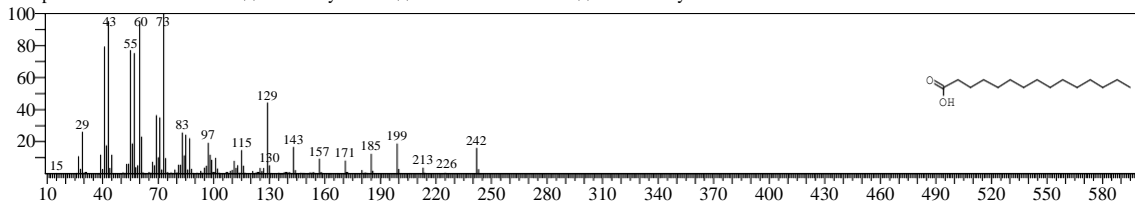

Hit#:5 Entry:29890 Library:NIST20R.lib  
SI:92 Formula:C15H30O2 CAS:1002-84-2 MolWeight:242 RetIndex:1869  
CompName:Pentadecanoic acid \$\$ Pentadecylic acid \$\$ n-Pentadecanoic acid \$\$ n-Pentadecylic acid

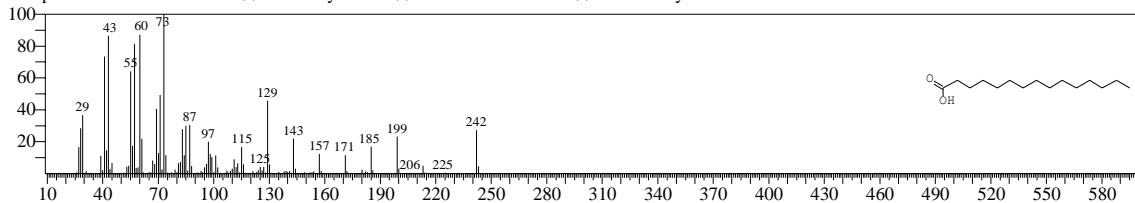

<<Target >>

Line#:16 R.Time:22.050(Scan#:1174) MassPeaks:410  
RawMode:Averaged 22.033-22.067(1173-1175) BasePeak:97.15(122363)  
BG Mode:Calc. from Peak Group 1 - Event 1 Scan

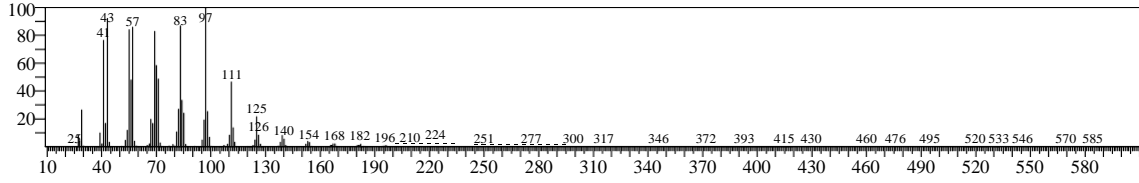

Hit#:1 Entry:32651 Library:NIST20R.lib  
SI:98 Formula:C19H38 CAS:18435-45-5 MolWeight:266 RetIndex:1900  
CompName:1-Nonadecene \$\$ Nonadec-1-ene

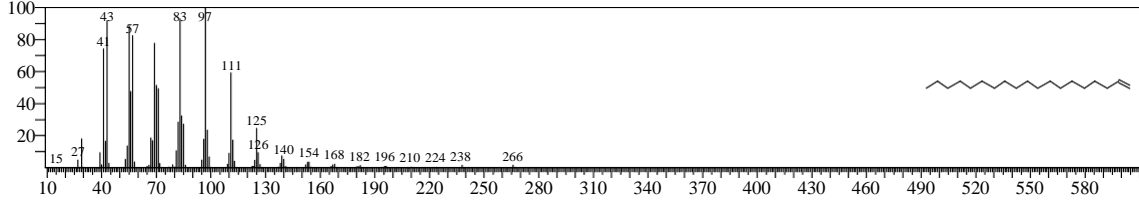

Hit#:2 Entry:29353 Library:NIST20R.lib  
SI:96 Formula:C17H34 CAS:6765-39-5 MolWeight:238 RetIndex:1701  
CompName:1-Heptadecene \$\$ Hexahydroaplotaxene \$\$ Heptadec-1-ene \$\$ NSC 77132 \$\$ Heptadecene (Related)

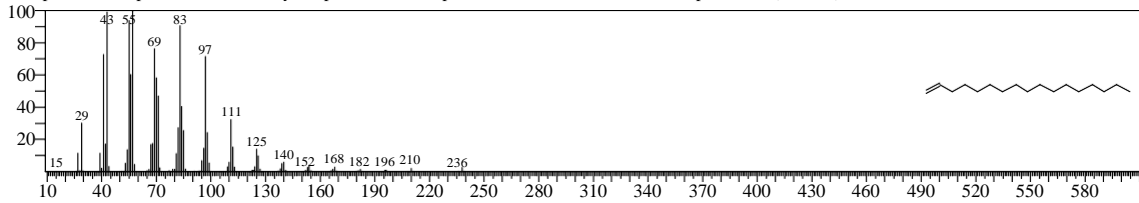

Hit#:3 Entry:38649 Library:NIST20R.lib  
SI:96 Formula:C24H48 CAS:10192-32-2 MolWeight:336 RetIndex:2397  
CompName:1-Tetracosene

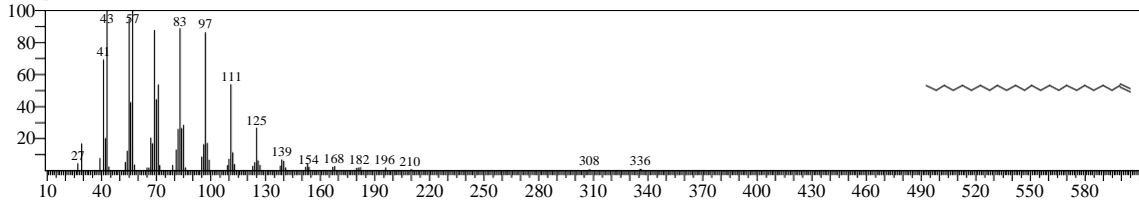

Hit#:4 Entry:40183 Library:NIST20R.lib  
SI:95 Formula:C26H52 CAS:18835-33-1 MolWeight:364 RetIndex:2596  
CompName:1-Hexacosene

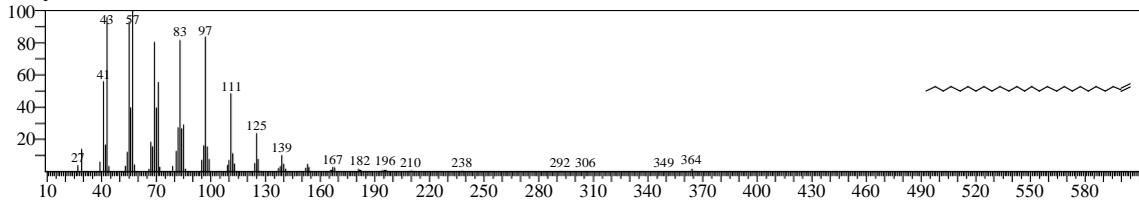

Hit#:5 Entry:31116 Library:NIST20R.lib  
SI:95 Formula:C18H36 CAS:112-88-9 MolWeight:252 RetIndex:1801  
CompName:1-Octadecene \$\$ .alpha.-Octadecene \$\$ Octadecylene, .alpha.- \$\$ Neodene 18 \$\$ Octadec-1-ene \$\$ Octadecene-1 \$\$ Octadeca-1-ene

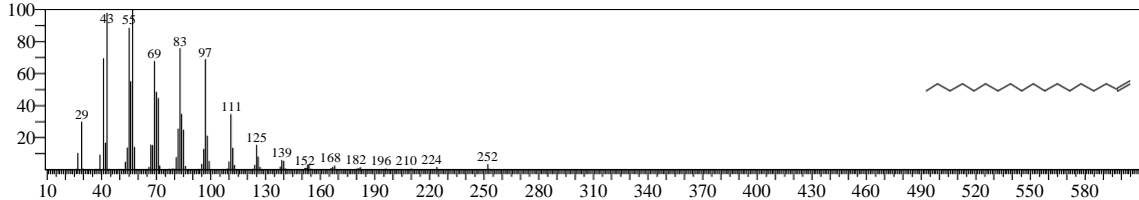

<<Target >>

Line#:17 R.Time:22.283(Scan#:1188) MassPeaks:327

RawMode:Averaged 22.267-22.300(1187-1189) BasePeak:206.05(9820)

BG Mode:Calc. from Peak Group 1 - Event 1 Scan

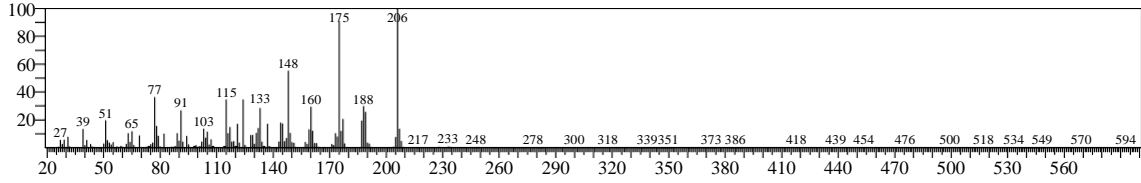

Hit#:1 Entry:58934 Library:NIST20M1.lib

SI:66 Formula:C13H18O2 CAS:58866-66-3 MolWeight:206 RetIndex:1488

CompName:7,7-Dimethoxy-2,3,4,5,6,7-hexahydro-1H-cyclopenta[a]pentalene

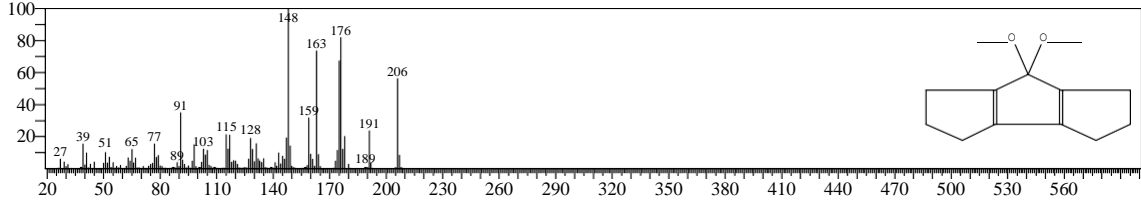

Hit#:2 Entry:23994 Library:NIST20R.lib

SI:63 Formula:C12H14O3 CAS:61227-52-9 MolWeight:206 RetIndex:1657

CompName:4,7-Dimethoxy-2-methylindan-1-one \$ 4,7-Dimethoxy-2-methyl-1-indanone #

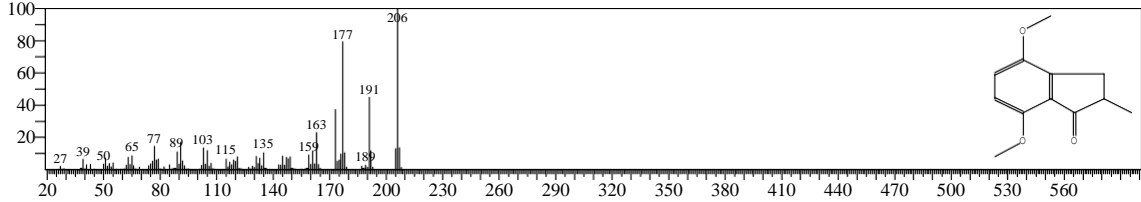

Hit#:3 Entry:58715 Library:NIST20M1.lib

SI:63 Formula:C12H14O3 CAS:61227-52-9 MolWeight:206 RetIndex:1657

CompName:4,7-Dimethoxy-2-methylindan-1-one \$ 4,7-Dimethoxy-2-methyl-1-indanone #

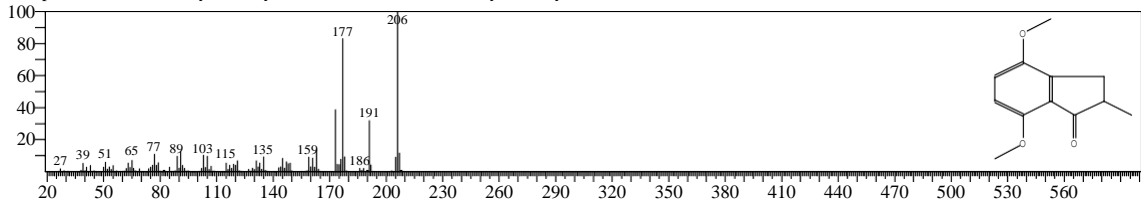

Hit#:4 Entry:59676 Library:NIST20M1.lib

SI:60 Formula:C11H13NO3 CAS:0-00-0 MolWeight:207 RetIndex:1801

CompName:(1E,2Z)-3-(4-hydroxy-3-methoxyphenyl)acrylaldehyde O-methyl oxime

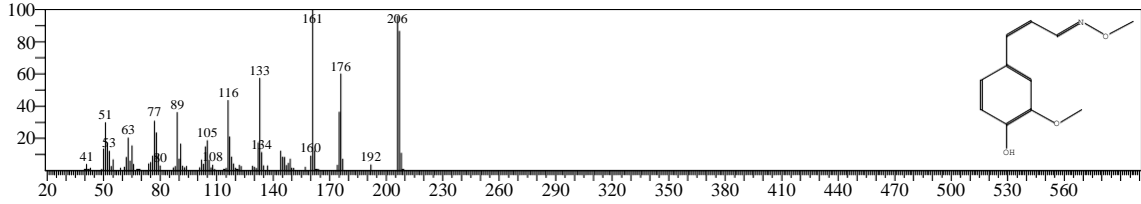

Hit#:5 Entry:58570 Library:NIST20M1.lib

SI:60 Formula:C11H14N2O2 CAS:0-00-0 MolWeight:206 RetIndex:1827

CompName:3-pyrazolidinone, 4-(hydroxymethyl)-4-methyl-1-phenyl- \$ 4-(hydroxymethyl)-4-methyl-1-phenylpyrazolidin-3-one

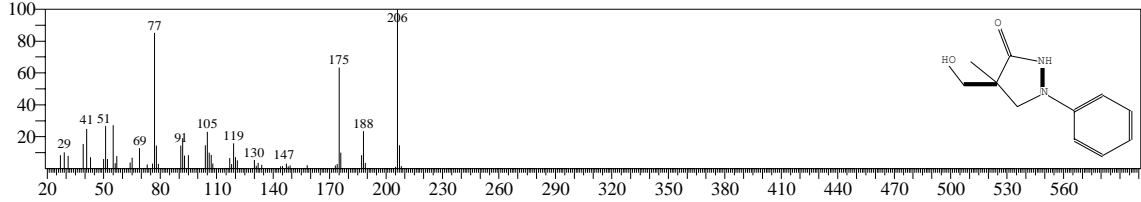



<<Target >>

Line#:18 R.Time:22.667(Scan#:1211) MassPeaks:406  
RawMode:Averaged 22.650-22.683(1210-1212) BasePeak:198.00(217338)  
BG Mode:Calc. from Peak Group 1 - Event 1 Scan

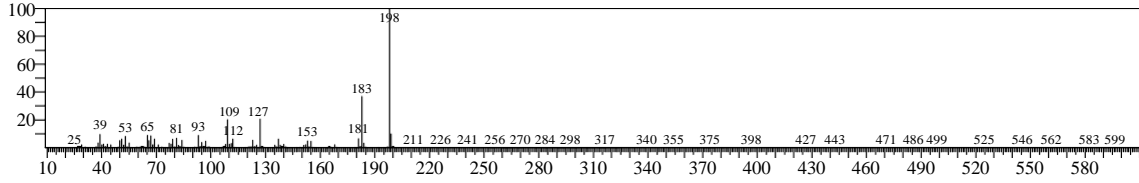

Hit#:1 Entry:22265 Library:NIST20R.lib

SI:96 Formula:C9H10O5 CAS:530-57-4 MolWeight:198 RetIndex:1749

CompName:Benzoic acid, 4-hydroxy-3,5-dimethoxy- \$\$ Syringic acid \$\$ 3,5-Dimethoxy-4-hydroxybenzoic acid \$\$ 4-Hydroxy-3,5-dimethoxybenzoic acid

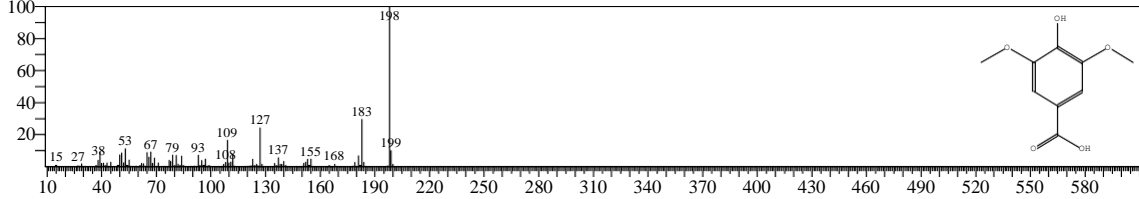

Hit#:2 Entry:22264 Library:NIST20R.lib

SI:95 Formula:C9H10O5 CAS:530-57-4 MolWeight:198 RetIndex:1749

CompName:Benzoic acid, 4-hydroxy-3,5-dimethoxy- \$\$ Syringic acid \$\$ 3,5-Dimethoxy-4-hydroxybenzoic acid \$\$ 4-Hydroxy-3,5-dimethoxybenzoic acid

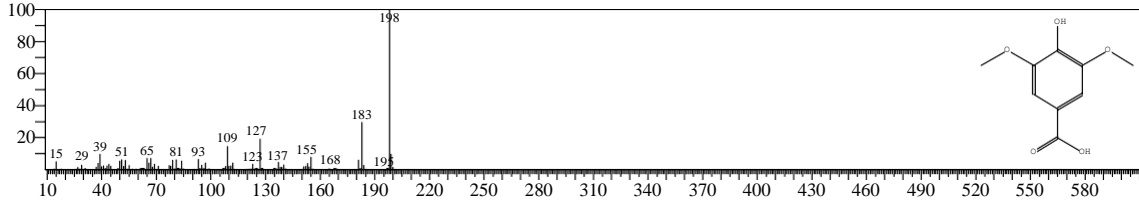

Hit#:3 Entry:22266 Library:NIST20R.lib

SI:94 Formula:C9H10O5 CAS:530-57-4 MolWeight:198 RetIndex:1749

CompName:Benzoic acid, 4-hydroxy-3,5-dimethoxy- \$\$ Syringic acid \$\$ 3,5-Dimethoxy-4-hydroxybenzoic acid \$\$ 4-Hydroxy-3,5-dimethoxybenzoic acid

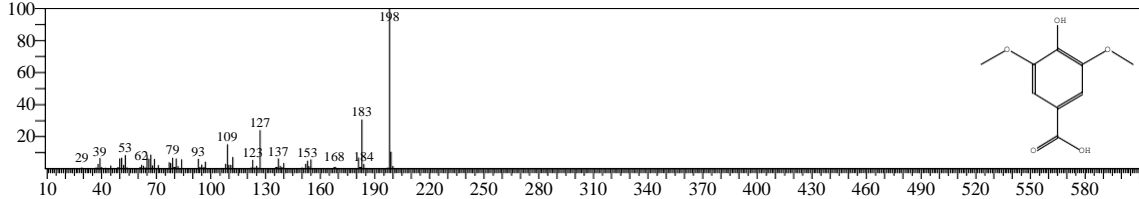

Hit#:4 Entry:51196 Library:NIST20M1.lib

SI:94 Formula:C9H10O5 CAS:530-57-4 MolWeight:198 RetIndex:1749

CompName:Benzoic acid, 4-hydroxy-3,5-dimethoxy- \$\$ Syringic acid \$\$ 3,5-Dimethoxy-4-hydroxybenzoic acid \$\$ 4-Hydroxy-3,5-dimethoxybenzoic acid

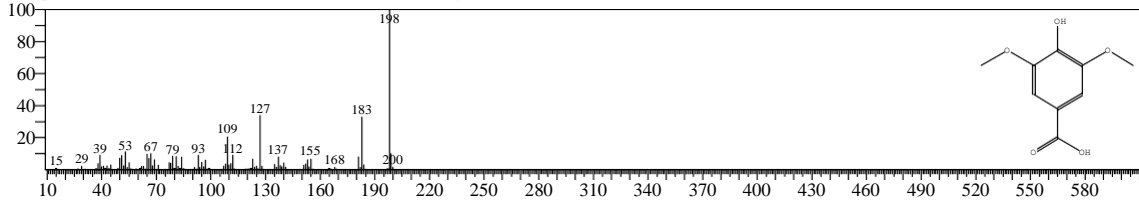

Hit#:5 Entry:22263 Library:NIST20R.lib

SI:89 Formula:C9H10O5 CAS:530-57-4 MolWeight:198 RetIndex:1749

CompName:Benzoic acid, 4-hydroxy-3,5-dimethoxy- \$\$ Syringic acid \$\$ 3,5-Dimethoxy-4-hydroxybenzoic acid \$\$ 4-Hydroxy-3,5-dimethoxybenzoic acid

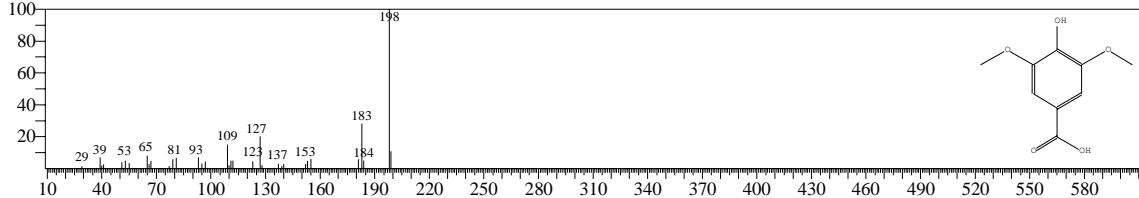

<<Target >>

Line#:19 R.Time:24.667(Scan#:1331) MassPeaks:432  
RawMode:Averaged 24.650-24.683(1330-1332) BasePeak:73.05(302431)  
BG Mode:Calc. from Peak Group 1 - Event 1 .Scan

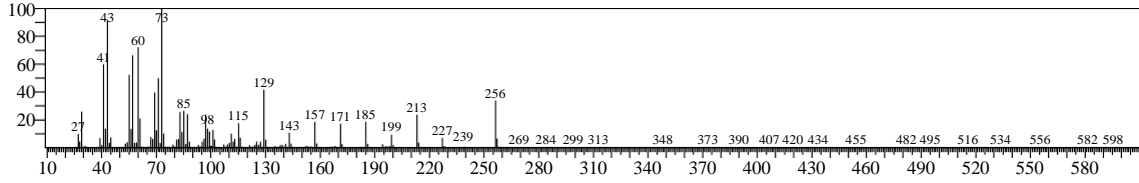

Hit#:1 Entry:31600 Library:NIST20R.lib  
SI:95 Formula:C16H32O2 CAS:57-10-3 MolWeight:256 RetIndex:1968  
CompName:n-Hexadecanoic acid \$ Hexadecanoic acid \$ n-Hexadecoic acid \$ Palmitic acid \$ Pentadecanecarboxylic acid \$ 1-Pentadecanecarboxylic

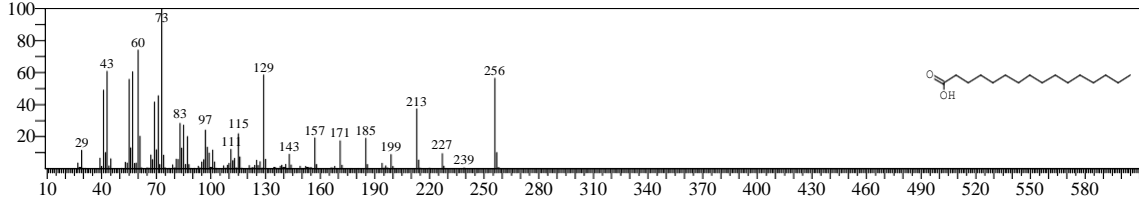

Hit#:2 Entry:31598 Library:NIST20R.lib  
SI:92 Formula:C16H32O2 CAS:57-10-3 MolWeight:256 RetIndex:1968  
CompName:n-Hexadecanoic acid \$ Hexadecanoic acid \$ n-Hexadecoic acid \$ Palmitic acid \$ Pentadecanecarboxylic acid \$ 1-Pentadecanecarboxylic

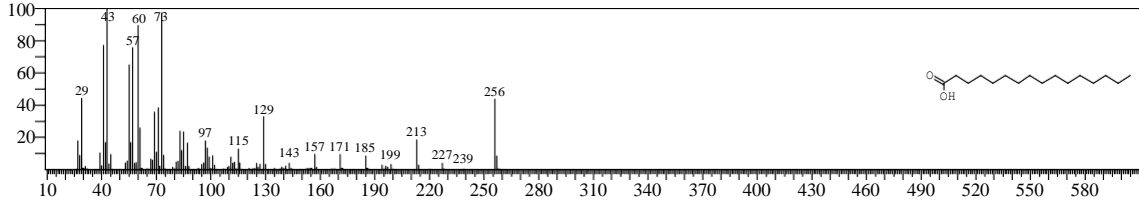

Hit#:3 Entry:44286 Library:NIST20M2.lib  
SI:92 Formula:C38H68O8 CAS:28474-90-0 MolWeight:652 RetIndex:4765  
CompName:l-(+)-Ascorbic acid 2,6-dihexadecanoate

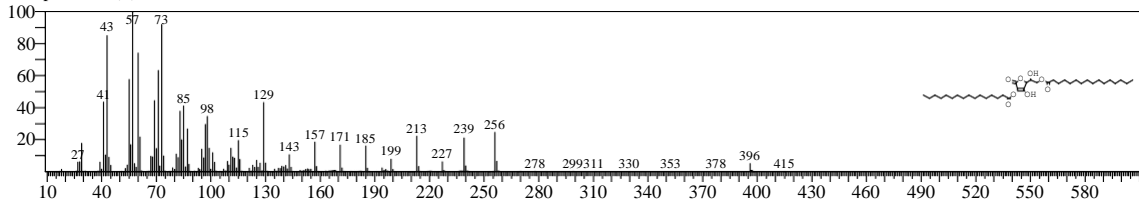

Hit#:4 Entry:31599 Library:NIST20R.lib  
SI:92 Formula:C16H32O2 CAS:57-10-3 MolWeight:256 RetIndex:1968  
CompName:n-Hexadecanoic acid \$ Hexadecanoic acid \$ n-Hexadecoic acid \$ Palmitic acid \$ Pentadecanecarboxylic acid \$ 1-Pentadecanecarboxylic

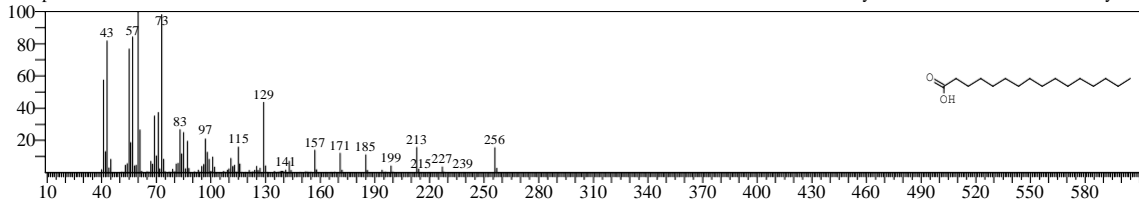

Hit#:5 Entry:96603 Library:NIST20M1.lib  
SI:91 Formula:C15H30O2 CAS:1002-84-2 MolWeight:242 RetIndex:1869  
CompName:Pentadecanoic acid \$ Pentadecylic acid \$ n-Pentadecanoic acid \$ n-Pentadecylic acid

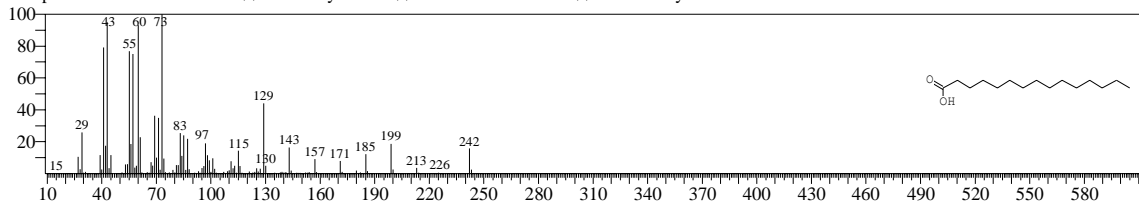

<<Target >>

Line#:20 R.Time:24.967(Scan#:1349) MassPeaks:403  
RawMode:Averaged 24.950-24.983(1348-1350) BasePeak:97.15(84912)  
BG Mode:Calc. from Peak Group 1 - Event 1 Scan

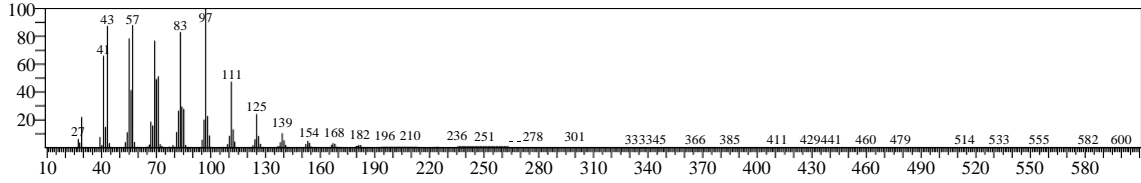

Hit#:1 Entry:32651 Library:NIST20R.lib  
SI:97 Formula:C19H38 CAS:18435-45-5 MolWeight:266 RetIndex:1900  
CompName:1-Nonadecene \$ Nonadec-1-ene

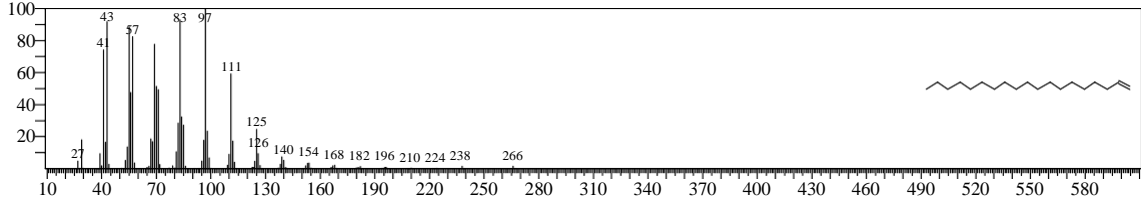

Hit#:2 Entry:40183 Library:NIST20R.lib  
SI:96 Formula:C26H52 CAS:18835-33-1 MolWeight:364 RetIndex:2596  
CompName:1-Hexacosene

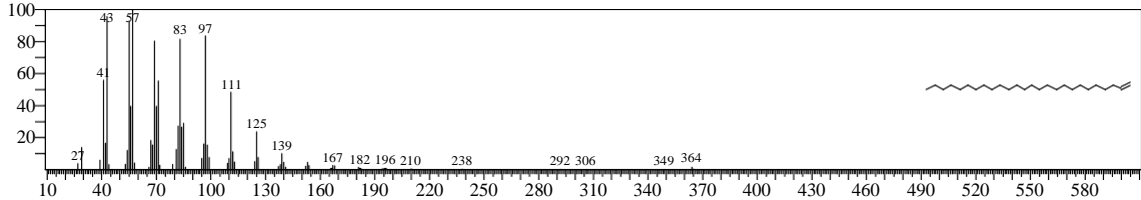

Hit#:3 Entry:38649 Library:NIST20R.lib  
SI:96 Formula:C24H48 CAS:10192-32-2 MolWeight:336 RetIndex:2397  
CompName:1-Tetracosene

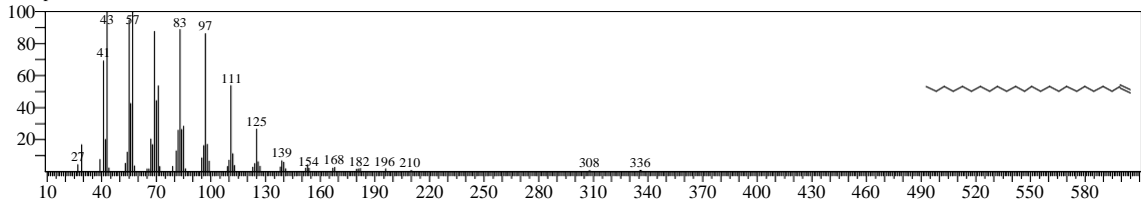

Hit#:4 Entry:37965 Library:NIST20R.lib  
SI:96 Formula:C22H46O CAS:661-19-8 MolWeight:326 RetIndex:2451  
CompName:Behenic alcohol \$ 1-Docosanol \$ Docosyl alcohol \$ Docosanol-(1) \$ Cachalot BE-22 \$ Loxil VPG 1451 \$ Docosan-1-ol \$ Behenyl a

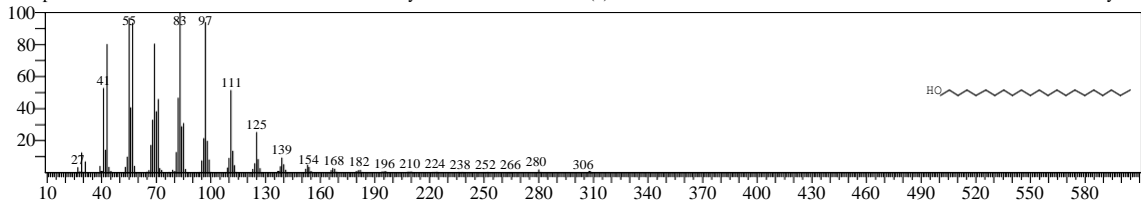

Hit#:5 Entry:178229 Library:NIST20M1.lib  
SI:95 Formula:C21H44O CAS:15594-90-8 MolWeight:312 RetIndex:2351  
CompName:1-Heneicosanol \$ Heneicosan-1-ol \$ Heneicosyl alcohol

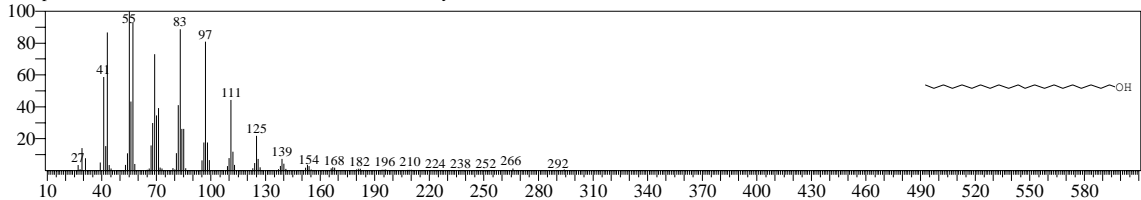

<<Target >>

Line#:21 R.Time:26.967(Scan#:1469) MassPeaks:413  
RawMode:Averaged 26.950-26.983(1468-1470) BasePeak:55.05(100651)  
BG Mode:Calc. from Peak Group 1 - Event 1 Scan

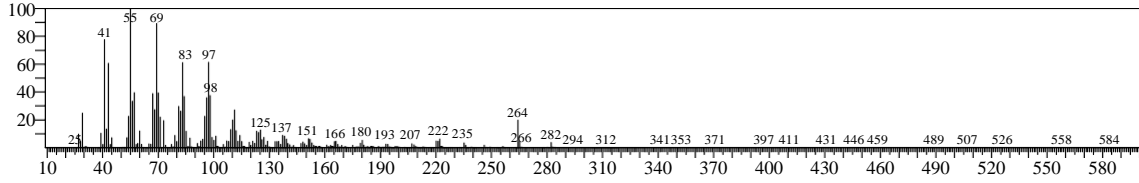

Hit#:1 Entry:34244 Library:NIST20R.lib

SI:95 Formula:C18H34O2 CAS:112-80-1 MolWeight:282 RetIndex:2175

CompName:Oleic Acid \$ 9-Octadecenoic acid (Z)- \$ .DELTA.9-cis-Oleic acid \$ cis-Oleic Acid \$ cis-9-Octadecenoic Acid \$ Emersol 211 \$ Emersol

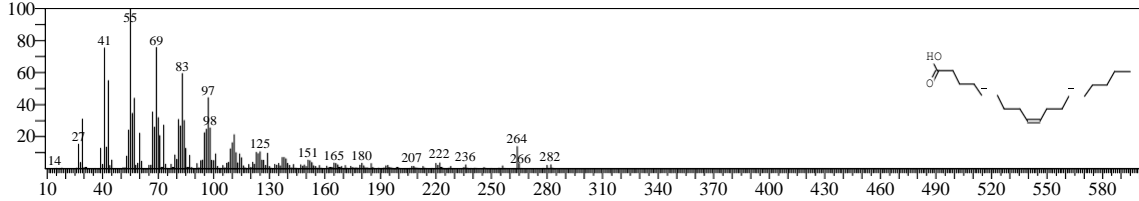

Hit#:2 Entry:34243 Library:NIST20R.lib

SI:94 Formula:C18H34O2 CAS:112-79-8 MolWeight:282 RetIndex:2175

CompName:9-Octadecenoic acid, (E)- \$ trans-.delta.(sup 9)-Octadecenoic acid \$ trans-.delta.9-Octadecenoic acid \$ trans-Octadec-9-enoic acid \$ trans-

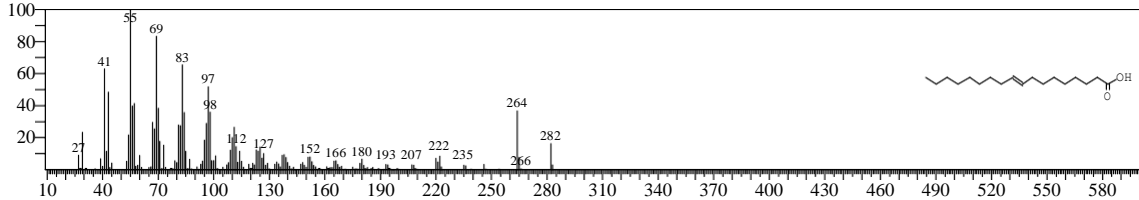

Hit#:3 Entry:142103 Library:NIST20M1.lib

SI:93 Formula:C18H34O2 CAS:593-39-5 MolWeight:282 RetIndex:2175

CompName:6-Octadecenoic acid, (Z)- \$ (6Z)-6-Octadecenoic acid # \$ cis-6-Octadecenoic acid \$ (Z)-Octadec-6-enoic acid \$ Petroselinic acid

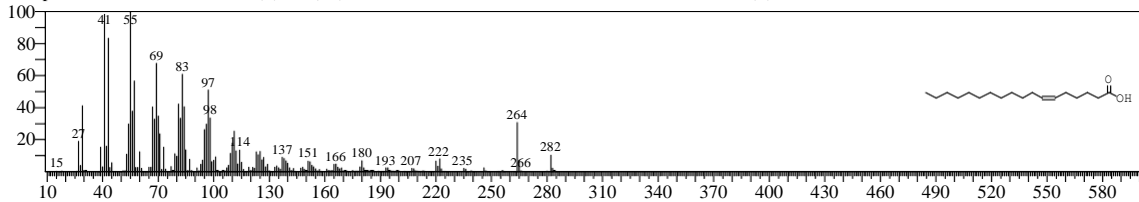

Hit#:4 Entry:142173 Library:NIST20M1.lib

SI:93 Formula:C18H34O2 CAS:112-79-8 MolWeight:282 RetIndex:2175

CompName:9-Octadecenoic acid, (E)- \$ trans-.delta.(sup 9)-Octadecenoic acid \$ trans-.delta.9-Octadecenoic acid \$ trans-Octadec-9-enoic acid \$ trans-

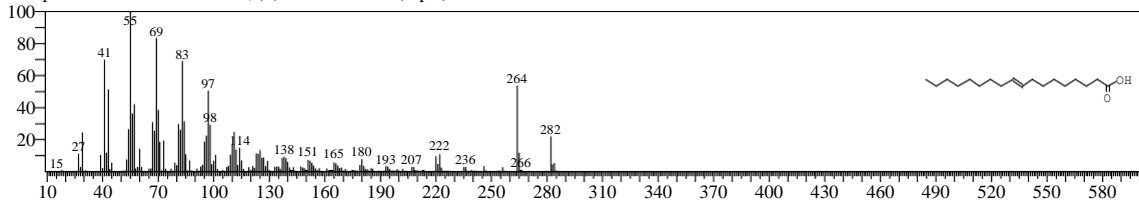

Hit#:5 Entry:142172 Library:NIST20M1.lib

SI:93 Formula:C18H34O2 CAS:2027-47-6 MolWeight:282 RetIndex:2175

CompName:9-Octadecenoic acid

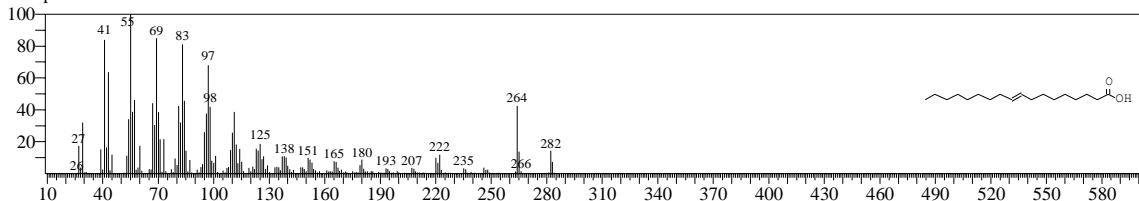

<<Target >>

Line#:22 R.Time:27.167(Scan#:1481) MassPeaks:334  
RawMode:Averaged 27.150-27.183(1480-1482) BasePeak:234.05(28505)  
BG Mode:Calc. from Peak Group 1 - Event 1 Scan

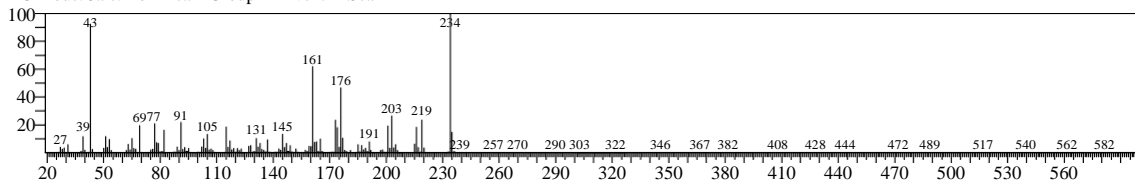

Hit#:1 Entry:87407 Library:NIST20M1.lib  
SI:65 Formula:C13H14O4 CAS:1396554-24-7 MolWeight:234 RetIndex:2208  
CompName:7-Acetyl-3,6-dihydroxy-8-methyl-3,4-dihydro-2H-naphthalen-1-one \$\$(2H)-Naphthalenone, 7-acetyl-3,4-dihydro-3,6-dihydroxy-8-methyl-

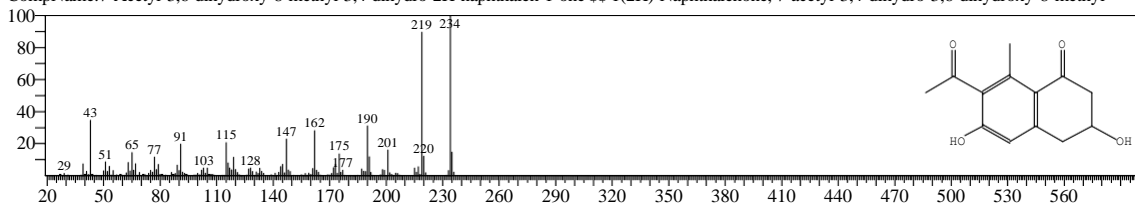

Hit#:2 Entry:87382 Library:NIST20M1.lib  
SI:60 Formula:C13H14O4 CAS:349496-09-9 MolWeight:234 RetIndex:1711  
CompName:2,4-Pentadienoic acid, 2-acetyl-4-methyl-5-(2-furyl)-, methyl ester \$\$(2E,4E)-2-acetyl-5-(2-furyl)-4-methyl-2,4-pentadienoate #

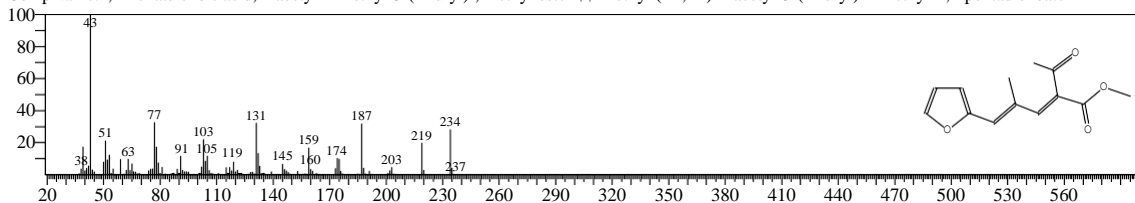

Hit#:3 Entry:87734 Library:NIST20M1.lib  
SI:60 Formula:C15H22O2 CAS:469-67-0 MolWeight:234 RetIndex:1866  
CompName:Isopetasol \$\$(2(3H)-Naphthalenone, 4,4a,5,6,7,8-hexahydro-6-hydroxy-4a,5-dimethyl-3-(1-methylethylidene)-, (4aR,5R,6R)- \$\$(2(3H)-Naphth

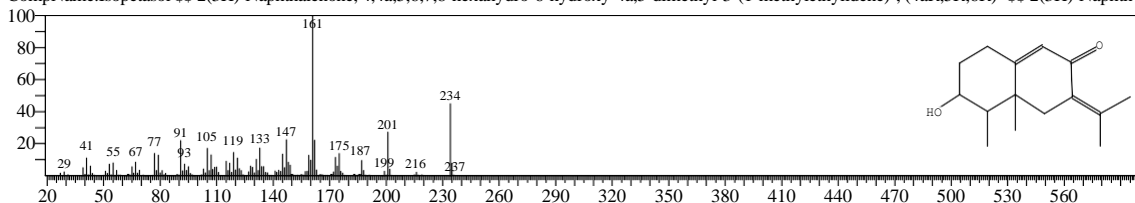

Hit#:4 Entry:33932 Library:NIST20M1.lib  
SI:59 Formula:C11H12O2 CAS:5910-25-8 MolWeight:176 RetIndex:1399  
CompName:2,4-Pentanedione, 3-phenyl- \$\$(3-Phenyl-2,4-pentanedione \$\$(3-Phenylacetylacetone

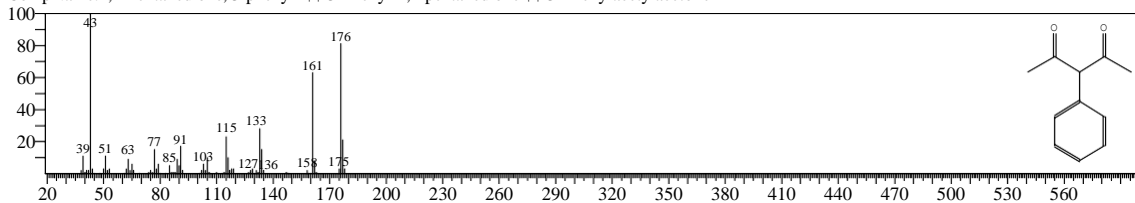

Hit#:5 Entry:87420 Library:NIST20M1.lib  
SI:58 Formula:C13H14O4 CAS:21987-07-5 MolWeight:234 RetIndex:2100  
CompName:Ethanone, 1-(4,6-dihydroxy-2,3,5-trimethyl-7-benzofuranyl)- \$\$(Ketone, 4,6-dihydroxy-2,3,5-trimethyl-7-benzofuranyl methyl \$\$(Usnetol \$\$(1-

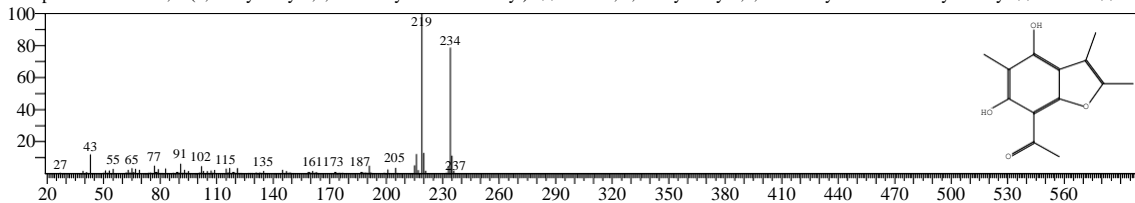

<<Target >>

Line#:23 R.Time:27.283(Scan#:1488) MassPeaks:339  
RawMode:Averaged 27.267-27.300(1487-1489) BasePeak:43.10(99968)  
BG Mode:Calc. from Peak Group 1 - Event 1 .Scan

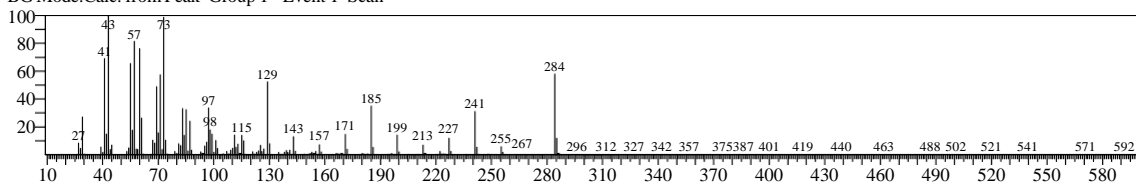

Hit#:1 Entry:34462 Library:NIST20R.lib  
SI:94 Formula:C18H36O2 CAS:57-11-4 MolWeight:284 RetIndex:2167  
CompName:Octadecanoic acid \$\$ Stearic acid \$\$ n-Octadecanoic acid \$\$ Humko Industrene R \$\$ Hydrofol Acid 150 \$\$ Hystrene S-97 \$\$ Hystrene T-70 \$

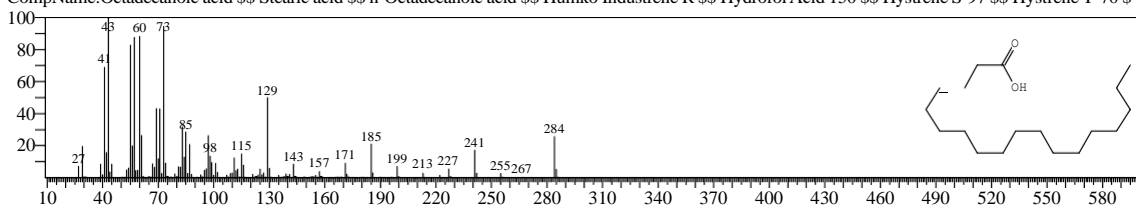

Hit#:2 Entry:144781 Library:NIST20M1.lib  
SI:92 Formula:C18H36O2 CAS:57-11-4 MolWeight:284 RetIndex:2167  
CompName:Octadecanoic acid \$\$ Stearic acid \$\$ n-Octadecanoic acid \$\$ Humko Industrene R \$\$ Hydrofol Acid 150 \$\$ Hystrene S-97 \$\$ Hystrene T-70 \$

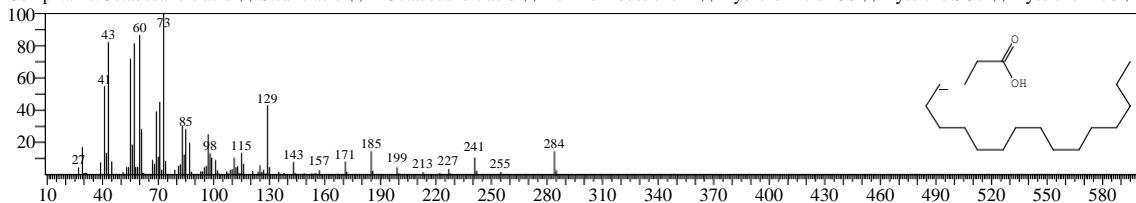

Hit#:3 Entry:34463 Library:NIST20R.lib  
SI:91 Formula:C18H36O2 CAS:57-11-4 MolWeight:284 RetIndex:2167  
CompName:Octadecanoic acid \$\$ Stearic acid \$\$ n-Octadecanoic acid \$\$ Humko Industrene R \$\$ Hydrofol Acid 150 \$\$ Hystrene S-97 \$\$ Hystrene T-70 \$

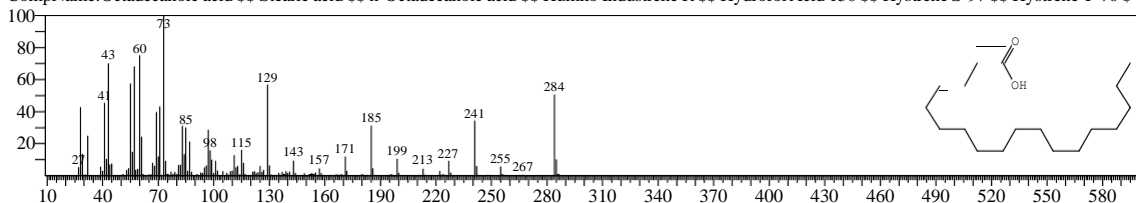

Hit#:4 Entry:34460 Library:NIST20R.lib  
SI:91 Formula:C18H36O2 CAS:57-11-4 MolWeight:284 RetIndex:2167  
CompName:Octadecanoic acid \$\$ Stearic acid \$\$ n-Octadecanoic acid \$\$ Humko Industrene R \$\$ Hydrofol Acid 150 \$\$ Hystrene S-97 \$\$ Hystrene T-70 \$

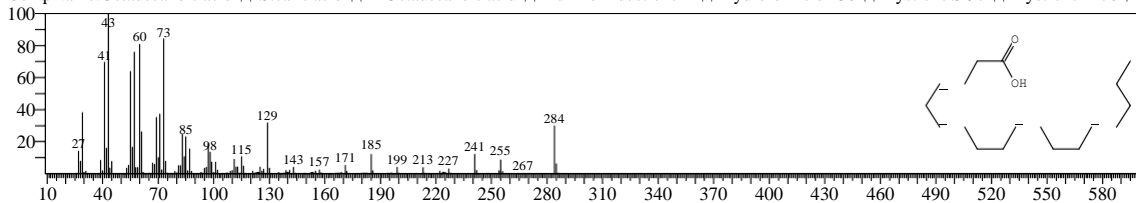

Hit#:5 Entry:96603 Library:NIST20M1.lib  
SI:88 Formula:C15H30O2 CAS:1002-84-2 MolWeight:242 RetIndex:1869  
CompName:Pentadecanoic acid \$\$ Pentadecylic acid \$\$ n-Pentadecanoic acid \$\$ n-Pentadecylic acid

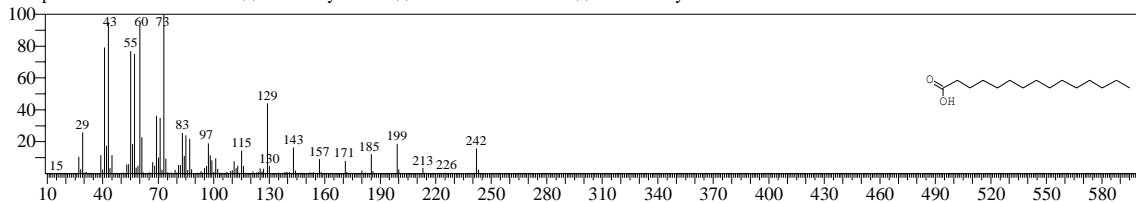

<<Target >>

Line#:24 R.Time:27.633(Scan#:1509) MassPeaks:291  
RawMode:Averaged 27.617-27.650(1508-1510) BasePeak:97.15(49524)  
BG Mode:Calc. from Peak Group 1 - Event 1 Scan

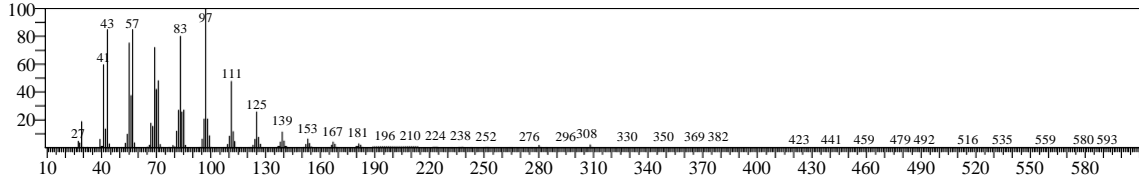

Hit#:1 Entry:32651 Library:NIST20R.lib  
SI:96 Formula:C19H38 CAS:18435-45-5 MolWeight:266 RetIndex:1900  
CompName:1-Nonadecene \$ Nonadec-1-ene

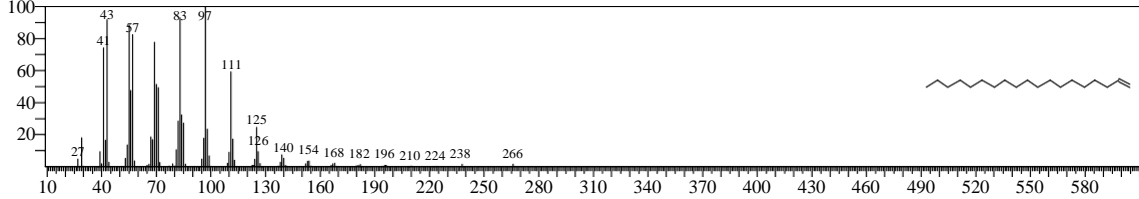

Hit#:2 Entry:40183 Library:NIST20R.lib  
SI:96 Formula:C26H52 CAS:18835-33-1 MolWeight:364 RetIndex:2596  
CompName:1-Hexacosene

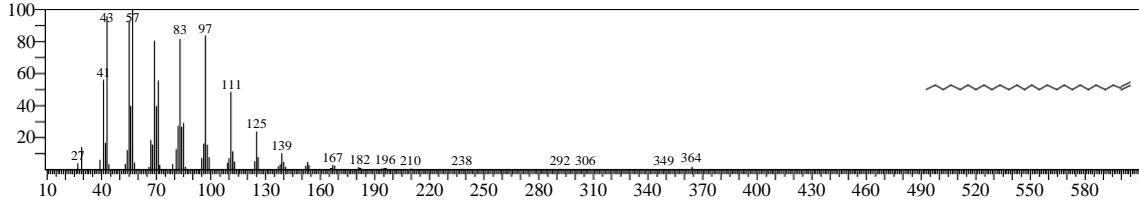

Hit#:3 Entry:38649 Library:NIST20R.lib  
SI:96 Formula:C24H48 CAS:10192-32-2 MolWeight:336 RetIndex:2397  
CompName:1-Tetrasosene

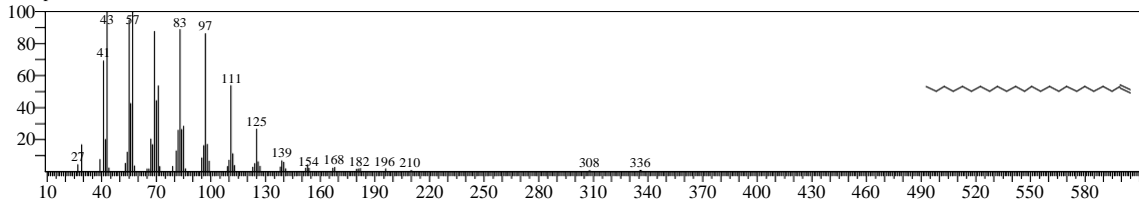

Hit#:4 Entry:37965 Library:NIST20R.lib  
SI:96 Formula:C22H46O CAS:661-19-8 MolWeight:326 RetIndex:2451  
CompName:Behenic alcohol \$ 1-Docosanol \$ Docosyl alcohol \$ Docosanol-(1) \$ Cachalot BE-22 \$ Loxiol VPG 1451 \$ Docosan-1-ol \$ Behenyl a

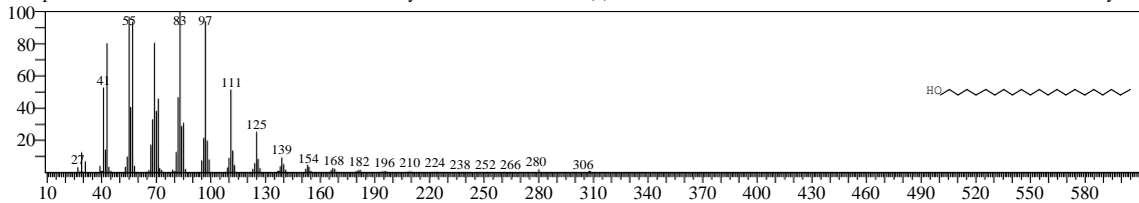

Hit#:5 Entry:224634 Library:NIST20M1.lib  
SI:96 Formula:C24H50O CAS:506-51-4 MolWeight:354 RetIndex:2650  
CompName:n-Tetrasosanol-1 \$ Lignoceric alcohol \$ Lignoceryl alcohol \$ 1-Tetrasosanol \$ Tetrasosanol-1-ol \$ Tetrasosyl alcohol \$ Lignoceryl \$ Tet

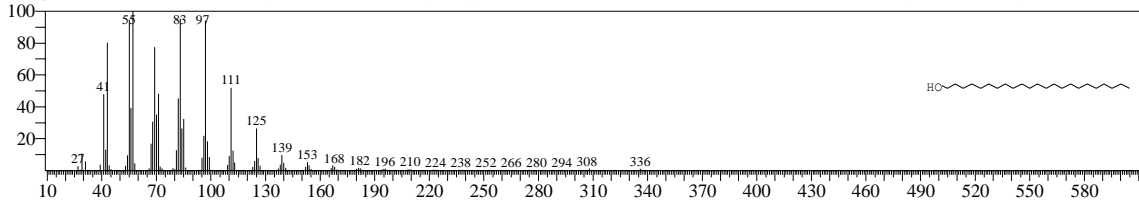

<<Target >>

Line#:25 R.Time:40.750(Scan#:2296) MassPeaks:531  
RawMode:Averaged 40.733-40.767(2295-2297) BasePeak:57.10(44856)  
BG Mode:Calc. from Peak Group 1 - Event 1 Scan

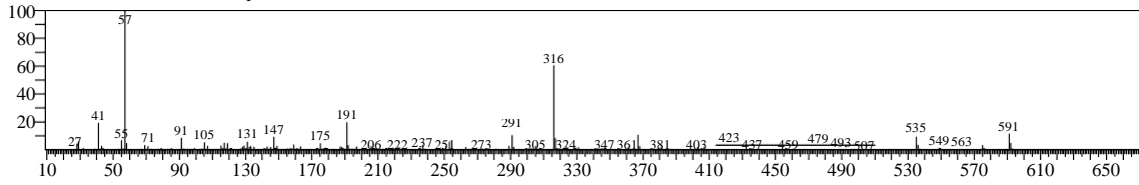

Hit#:1 Entry:44526 Library:NIST20M2.lib

SI:66 Formula:C42H63O4P CAS:95906-11-9 MolWeight:662 RetIndex:0

CompName:Tris(2,4-di-tert-butylphenyl) phosphate \$\$ Phenol, 2,4-bis(1,1-dimethylethyl)-, 1,1,1"-phosphate \$\$ Phenol, 2,4-bis(1,1-dimethylethyl)-, phosph

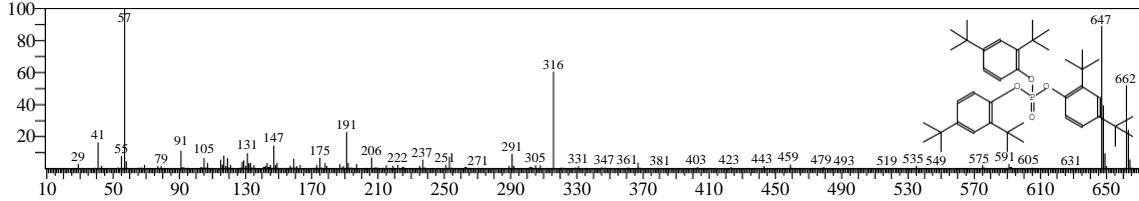

Hit#:2 Entry:214636 Library:NIST20M1.lib

SI:60 Formula:C23H36O2 CAS:56771-86-9 MolWeight:344 RetIndex:2435

CompName:1,4-Epoxy naphthalene-1(2H)-methanol, 4,5,7-tris(1,1-dimethylethyl)-3,4-dihydro-

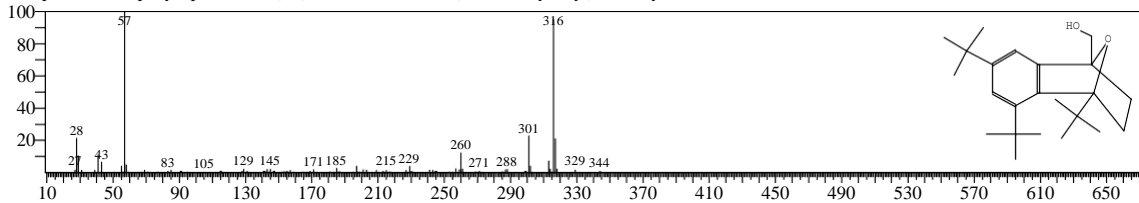

Hit#:3 Entry:182391 Library:NIST20M1.lib

SI:57 Formula:C17H23F3O2 CAS:0-00-0 MolWeight:316 RetIndex:1662

CompName:2,6-Di-tert-butyl-4-methylphenol, O-trifluoroacetyl \$\$ 2,6-Di-tert-butyl-4-methylphenyl 2,2,2-trifluoroacetate

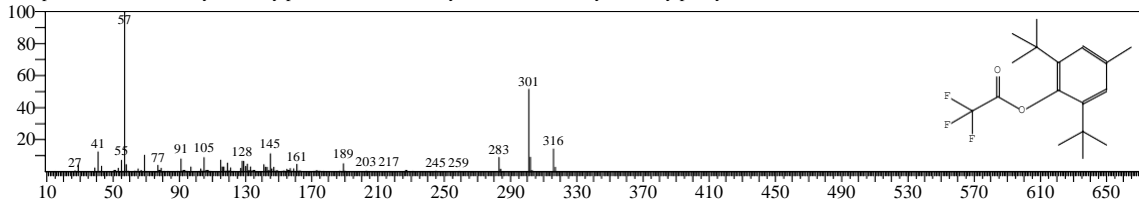

Hit#:4 Entry:42214 Library:NIST20M2.lib

SI:56 Formula:C40H58O3 CAS:134868-71-6 MolWeight:586 RetIndex:4549

CompName:2-tert-Butyl-4,6-bis(3,5-di-tert-butyl-4-hydroxybenzyl)phenol

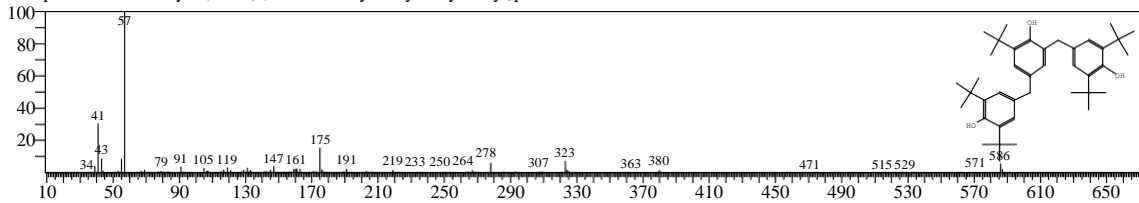

Hit#:5 Entry:43041 Library:NIST20M2.lib

SI:56 Formula:C36H49BrO3 CAS:98007-30-8 MolWeight:608 RetIndex:4542

CompName:4-Bromo-2,6-bis(3,5-di-tert-butyl-4-hydroxybenzyl)phenol

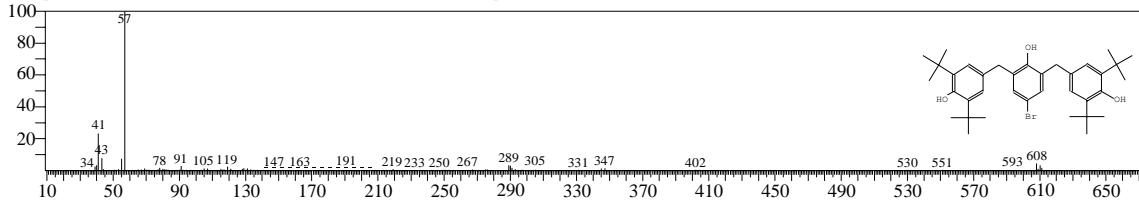



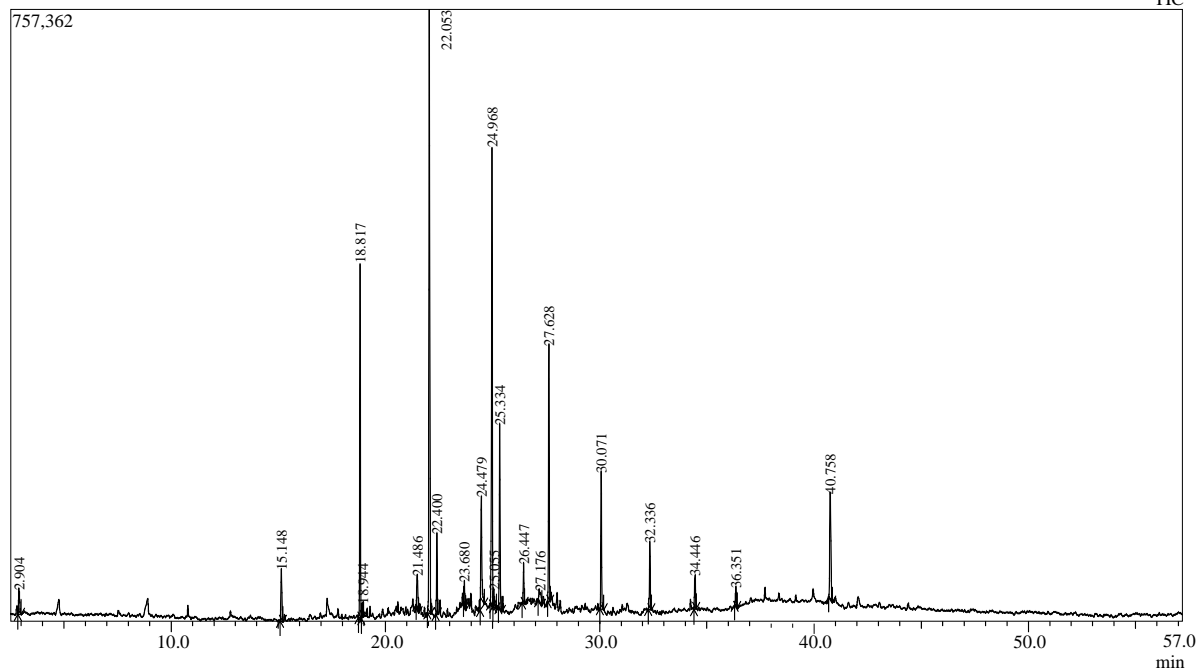

| Peak Report TIC |        |        |        |         |        |         |         |      |      |                                   |
|-----------------|--------|--------|--------|---------|--------|---------|---------|------|------|-----------------------------------|
| Peak#           | R.Time | I.Time | F.Time | Area    | Area%  | Height  | Height% | A/H  | Mark | Name                              |
| 1               | 2.904  | 2.850  | 3.000  | 105820  | 1.16   | 32135   | 0.98    | 3.29 |      | 1-Butanol, 3-methyl-, acetate     |
| 2               | 15.148 | 15.083 | 15.217 | 169445  | 1.86   | 65136   | 1.99    | 2.60 |      | Cetene                            |
| 3               | 18.817 | 18.750 | 18.883 | 1126642 | 12.37  | 437540  | 13.40   | 2.57 |      | 1-Nonadecene                      |
| 4               | 18.944 | 18.883 | 18.983 | 52888   | 0.58   | 19074   | 0.58    | 2.77 |      | Hexadecane                        |
| 5               | 21.486 | 21.433 | 21.550 | 120158  | 1.32   | 41324   | 1.27    | 2.91 |      | Eicosanoic acid                   |
| 6               | 22.053 | 21.950 | 22.117 | 2001824 | 21.99  | 747018  | 22.88   | 2.68 |      | 1-Octadecene                      |
| 7               | 22.400 | 22.350 | 22.450 | 260124  | 2.86   | 100889  | 3.09    | 2.58 | V    | Octadecanal                       |
| 8               | 23.680 | 23.650 | 23.750 | 58205   | 0.64   | 28515   | 0.87    | 2.04 |      | 7,9-Di-tert-butyl-1-oxaspiro(4,5) |
| 9               | 24.479 | 24.417 | 24.617 | 526721  | 5.78   | 138809  | 4.25    | 3.79 | V    | n-Hexadecanoic acid               |
| 10              | 24.968 | 24.883 | 25.017 | 1502977 | 16.51  | 565620  | 17.32   | 2.66 |      | 1-Tetracosene                     |
| 11              | 25.055 | 25.017 | 25.183 | 85603   | 0.94   | 22872   | 0.70    | 3.74 | V    | Carbonic acid, eicosyl prop-1-en  |
| 12              | 25.334 | 25.267 | 25.433 | 620412  | 6.81   | 229668  | 7.03    | 2.70 |      | Octadecanal                       |
| 13              | 26.447 | 26.383 | 26.500 | 129778  | 1.43   | 49725   | 1.52    | 2.61 |      | Octadecanenitrile                 |
| 14              | 27.176 | 27.117 | 27.300 | 94787   | 1.04   | 15643   | 0.48    | 6.06 |      | Octadecanoic acid                 |
| 15              | 27.628 | 27.567 | 27.683 | 866305  | 9.51   | 318024  | 9.74    | 2.72 |      | 1-Tetracosene                     |
| 16              | 30.071 | 30.000 | 30.183 | 488934  | 5.37   | 170352  | 5.22    | 2.87 |      | 1-Hexacosene                      |
| 17              | 32.336 | 32.267 | 32.417 | 242627  | 2.66   | 84359   | 2.58    | 2.88 |      | Octacosanol                       |
| 18              | 34.446 | 34.400 | 34.500 | 121041  | 1.33   | 42330   | 1.30    | 2.86 | V    | Octadecyl trifluoroacetate        |
| 19              | 36.351 | 36.300 | 36.417 | 63069   | 0.69   | 23472   | 0.72    | 2.69 |      | Tricosyl trifluoroacetate         |
| 20              | 40.758 | 40.683 | 40.850 | 468013  | 5.14   | 132489  | 4.06    | 3.53 |      | Tris(2,4-di-tert-butylphenyl) pho |
|                 |        |        |        | 9105373 | 100.00 | 3264994 | 100.00  |      |      |                                   |

Library

<<Target >>

Line#:1 R.Time:2.900(Scan#:25) MassPeaks:363  
RawMode:Averaged 2.883-2.917(24-26) BasePeak:43.05(7496)  
BG Mode:Calc. from Peak Group 1 - Event 1 Scan

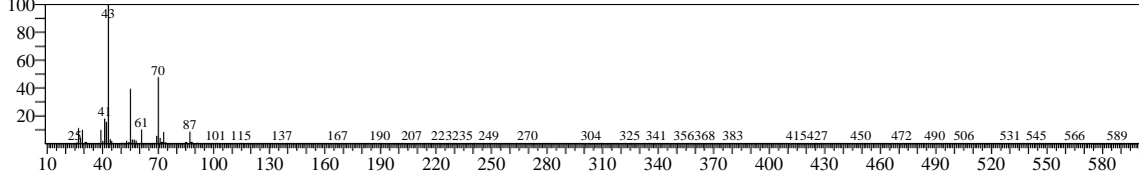

Hit#:1 Entry:6782 Library:NIST20R.lib  
SI:96 Formula:C7H14O2 CAS:123-92-2 MolWeight:130 RetIndex:820  
CompName:1-Butanol, 3-methyl-, acetate \$\$ Isopentyl alcohol, acetate \$\$ Acetic acid, 3-methylbutyl ester \$\$ Banana oil \$\$ Isoamyl acetate \$\$ Isoamyl etha

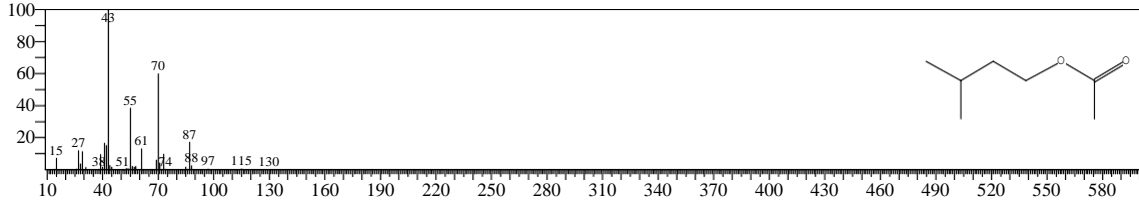

Hit#:2 Entry:6785 Library:NIST20R.lib  
SI:95 Formula:C7H14O2 CAS:123-92-2 MolWeight:130 RetIndex:820  
CompName:1-Butanol, 3-methyl-, acetate \$\$ Isopentyl alcohol, acetate \$\$ Acetic acid, 3-methylbutyl ester \$\$ Banana oil \$\$ Isoamyl acetate \$\$ Isoamyl etha

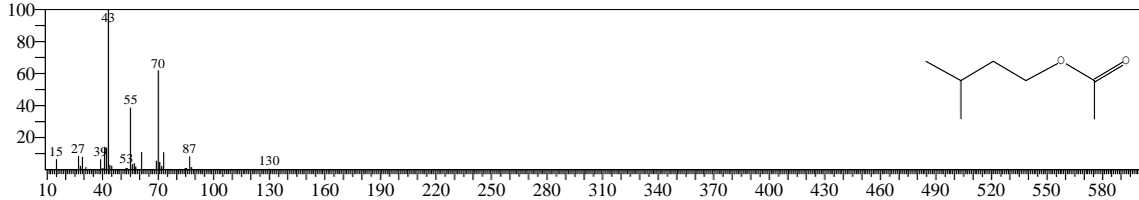

Hit#:3 Entry:8673 Library:NIST20M1.lib  
SI:95 Formula:C7H14O2 CAS:123-92-2 MolWeight:130 RetIndex:820  
CompName:1-Butanol, 3-methyl-, acetate \$\$ Isopentyl alcohol, acetate \$\$ Acetic acid, 3-methylbutyl ester \$\$ Banana oil \$\$ Isoamyl acetate \$\$ Isoamyl etha

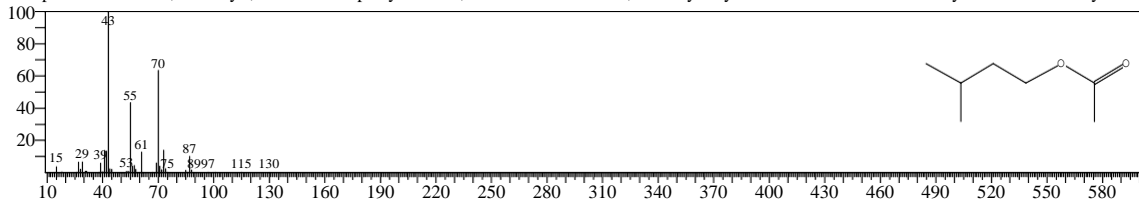

Hit#:4 Entry:6784 Library:NIST20R.lib  
SI:95 Formula:C7H14O2 CAS:123-92-2 MolWeight:130 RetIndex:820  
CompName:1-Butanol, 3-methyl-, acetate \$\$ Isopentyl alcohol, acetate \$\$ Acetic acid, 3-methylbutyl ester \$\$ Banana oil \$\$ Isoamyl acetate \$\$ Isoamyl etha

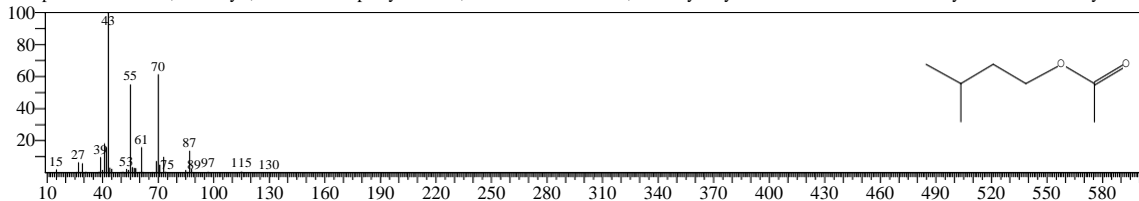

Hit#:5 Entry:6783 Library:NIST20R.lib  
SI:93 Formula:C7H14O2 CAS:123-92-2 MolWeight:130 RetIndex:820  
CompName:1-Butanol, 3-methyl-, acetate \$\$ Isopentyl alcohol, acetate \$\$ Acetic acid, 3-methylbutyl ester \$\$ Banana oil \$\$ Isoamyl acetate \$\$ Isoamyl etha

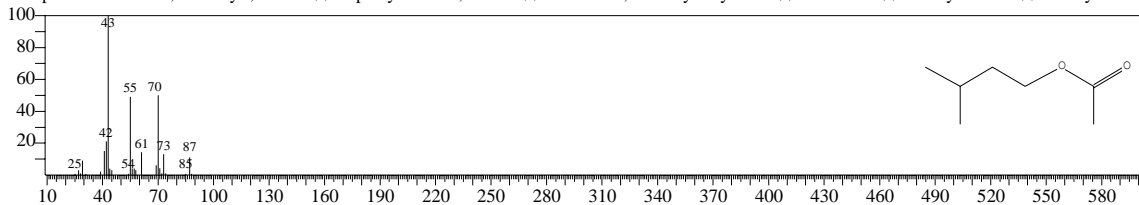

<<Target >>

Line#:2 R.Time:15.150(Scan#:760) MassPeaks:348  
RawMode:Averaged 15.133-15.167(759-761) BasePeak:41.05(4835)  
BG Mode:Calc. from Peak Group 1 - Event 1 Scan

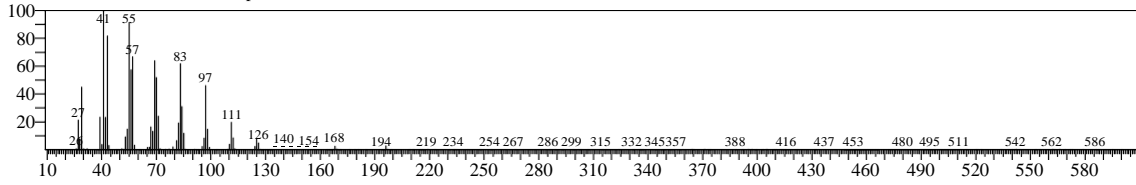

Hit#:1 Entry:27374 Library:NIST20R.lib  
SI:97 Formula:C16H32 CAS:629-73-2 MolWeight:224 RetIndex:1602  
CompName:Cetene \$\$ 1-Hexadecene \$\$ .alpha.-Hexadecene \$\$ n-Hexadec-1-ene \$\$ 1-Cetene \$\$ Hexadecylene-1 \$\$ Hexadec-1-ene \$\$ Hexadecene-1 \$\$ N

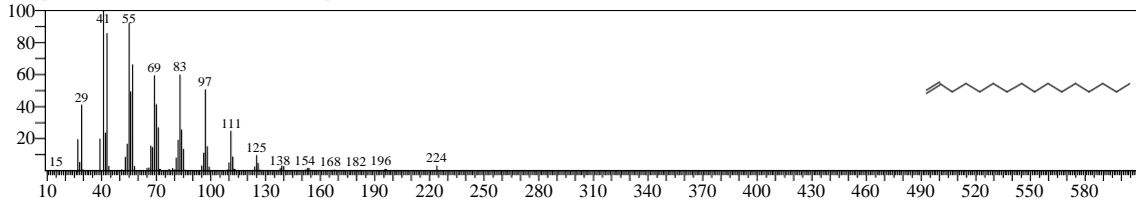

Hit#:2 Entry:22010 Library:NIST20R.lib  
SI:97 Formula:C14H28 CAS:1120-36-1 MolWeight:196 RetIndex:1403  
CompName:1-Tetradecene \$\$ n-Tetradec-1-ene \$\$ .alpha.-Tetradecene \$\$ Neodene 14 \$\$ Tetradec-1-ene \$\$ Tetradecene-1

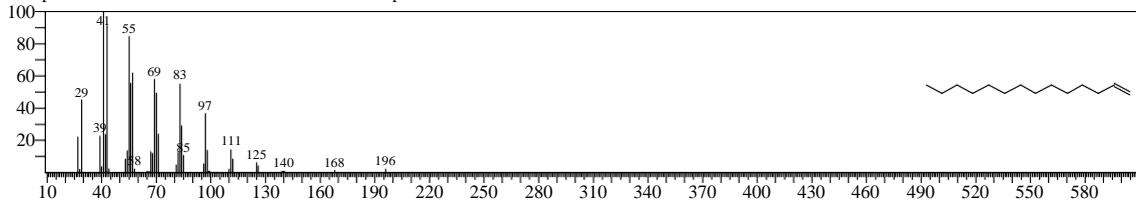

Hit#:3 Entry:24888 Library:NIST20R.lib  
SI:97 Formula:C15H30 CAS:13360-61-7 MolWeight:210 RetIndex:1502  
CompName:1-Pentadecene \$\$ Pentadecene, 1- \$\$ Pentadec-1-ene

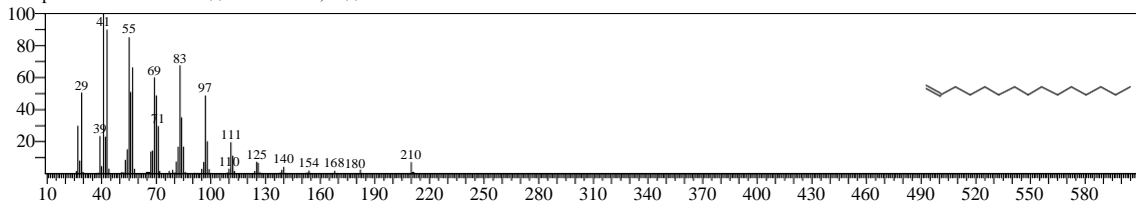

Hit#:4 Entry:27376 Library:NIST20R.lib  
SI:97 Formula:C16H32 CAS:629-73-2 MolWeight:224 RetIndex:1602  
CompName:Cetene \$\$ 1-Hexadecene \$\$ .alpha.-Hexadecene \$\$ n-Hexadec-1-ene \$\$ 1-Cetene \$\$ Hexadecylene-1 \$\$ Hexadec-1-ene \$\$ Hexadecene-1 \$\$ N

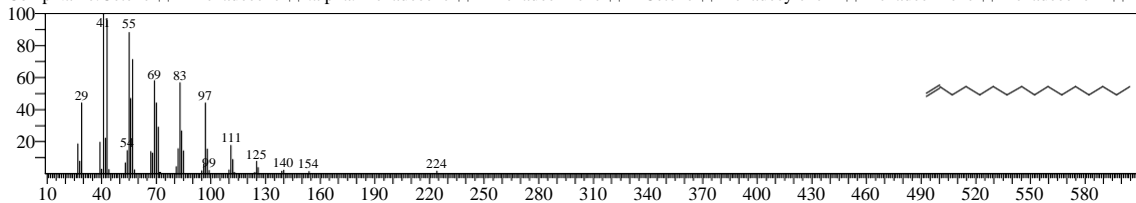

Hit#:5 Entry:27373 Library:NIST20R.lib  
SI:96 Formula:C16H32 CAS:629-73-2 MolWeight:224 RetIndex:1602  
CompName:Cetene \$\$ 1-Hexadecene \$\$ .alpha.-Hexadecene \$\$ n-Hexadec-1-ene \$\$ 1-Cetene \$\$ Hexadecylene-1 \$\$ Hexadec-1-ene \$\$ Hexadecene-1 \$\$ N

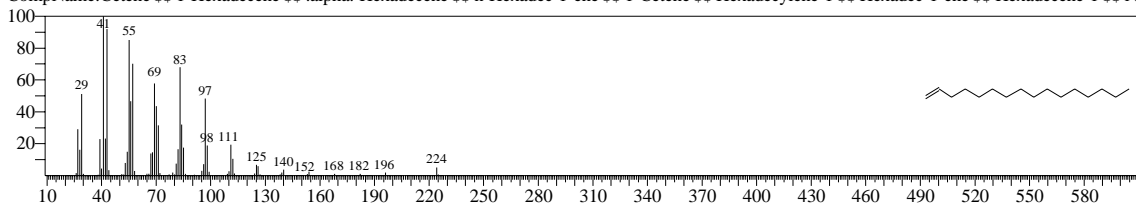

<<Target >>

Line#:3 R.Time:18.817(Scan#:980) MassPeaks:313  
RawMode:Averaged 18.800-18.833(979-981) BasePeak:41.05(29222)  
BG Mode:Calc. from Peak Group 1 - Event 1 Scan

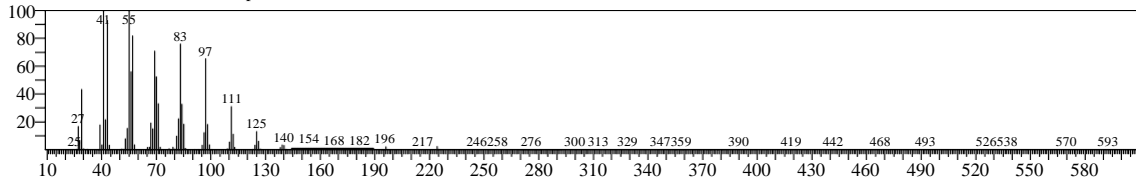

Hit#:1 Entry:32652 Library:NIST20R.lib  
SI:97 Formula:C19H38 CAS:18435-45-5 MolWeight:266 RetIndex:1900  
CompName:1-Nonadecene \$\$ Nonadec-1-ene

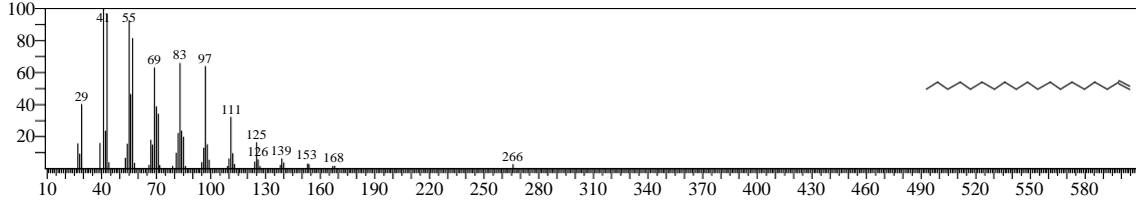

Hit#:2 Entry:107593 Library:NIST20M1.lib  
SI:97 Formula:C18H36 CAS:112-88-9 MolWeight:252 RetIndex:1801  
CompName:1-Octadecene \$\$ .alpha.-Octadecene \$\$ Octadecylene, .alpha.- \$\$ Neodene 18 \$\$ Octadec-1-ene \$\$ Octadecene-1 \$\$ Octadeca-1-ene

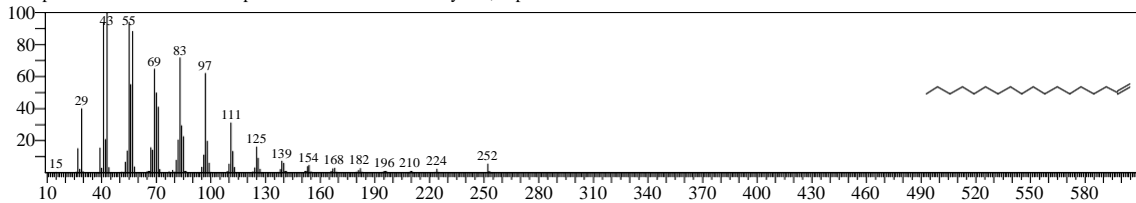

Hit#:3 Entry:27375 Library:NIST20R.lib  
SI:96 Formula:C16H32 CAS:629-73-2 MolWeight:224 RetIndex:1602  
CompName:Cetene \$\$ 1-Hexadecene \$\$ .alpha.-Hexadecene \$\$ n-Hexadec-1-ene \$\$ 1-Cetene \$\$ Hexadecylene-1 \$\$ Hexadec-1-ene \$\$ Hexadecene-1 \$\$ N

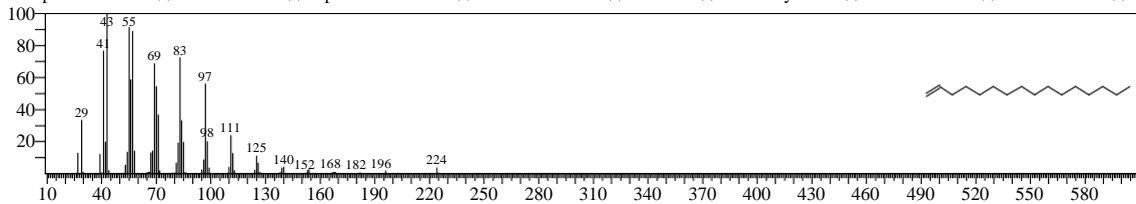

Hit#:4 Entry:31115 Library:NIST20R.lib  
SI:96 Formula:C18H36 CAS:112-88-9 MolWeight:252 RetIndex:1801  
CompName:1-Octadecene \$\$ .alpha.-Octadecene \$\$ Octadecylene, .alpha.- \$\$ Neodene 18 \$\$ Octadec-1-ene \$\$ Octadecene-1 \$\$ Octadeca-1-ene

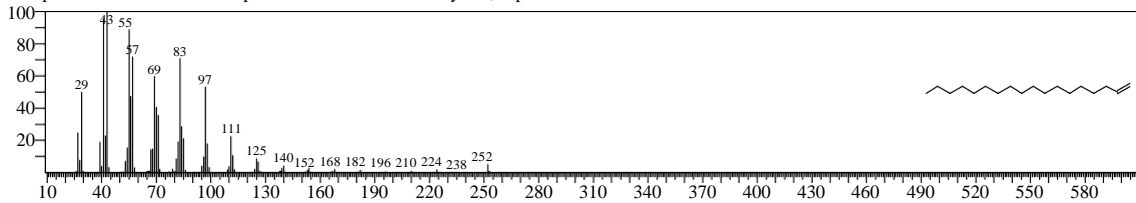

Hit#:5 Entry:107601 Library:NIST20M1.lib  
SI:96 Formula:C18H36 CAS:7206-19-1 MolWeight:252 RetIndex:1818  
CompName:3-Octadecene, (E)- \$\$ (3E)-3-Octadecene (E)-3-Octadecene \$\$ trans-3-Octadecene

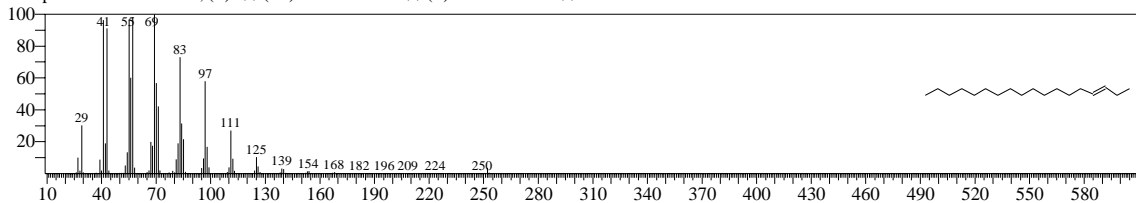

<<Target >>

Line#:4 R.Time:18.950(Scan#:988) MassPeaks:291  
RawMode:Averaged 18.933-18.967(987-989) BasePeak:57.10(2744)  
BG Mode:Calc. from Peak Group 1 - Event 1 Scan

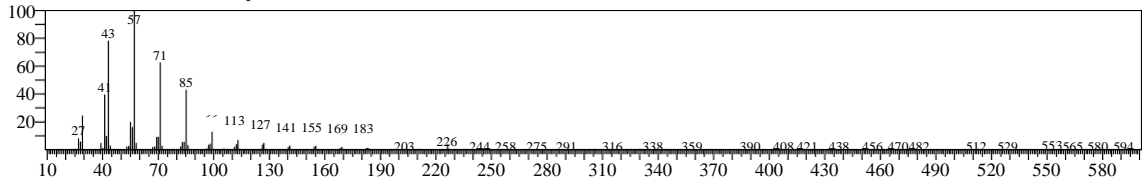

Hit#:1 Entry:27736 Library:NIST20R.lib  
SI:96 Formula:C16H34 CAS:544-76-3 MolWeight:226 RetIndex:1600  
CompName:Hexadecane \$ n-Cetane \$ n-Hexadecane \$ Cetane

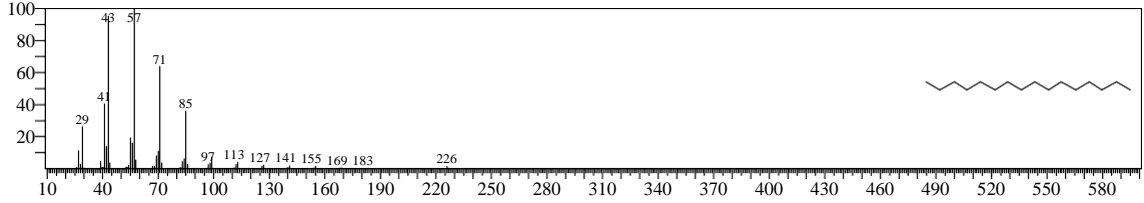

Hit#:2 Entry:22497 Library:NIST20R.lib  
SI:96 Formula:C14H30 CAS:629-59-4 MolWeight:198 RetIndex:1400  
CompName:Tetradecane \$ n-Tetradecane

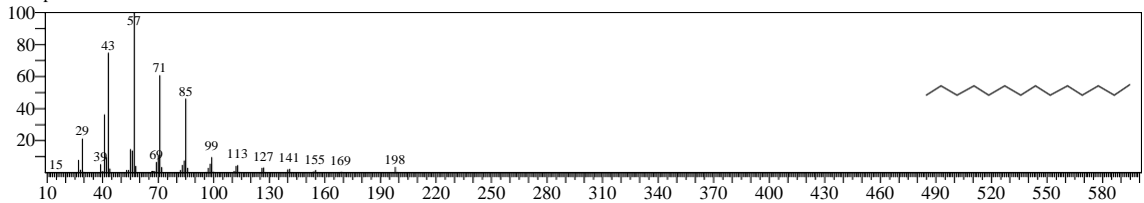

Hit#:3 Entry:25293 Library:NIST20R.lib  
SI:96 Formula:C15H32 CAS:629-62-9 MolWeight:212 RetIndex:1500  
CompName:Pentadecane \$ n-Pentadecane \$ CH3(CH2)13CH3

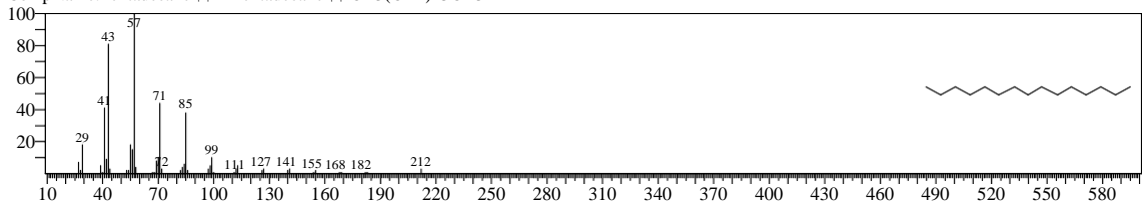

Hit#:4 Entry:32904 Library:NIST20R.lib  
SI:96 Formula:C19H40 CAS:629-92-5 MolWeight:268 RetIndex:1900  
CompName:Nonadecane \$ n-Nonadecane

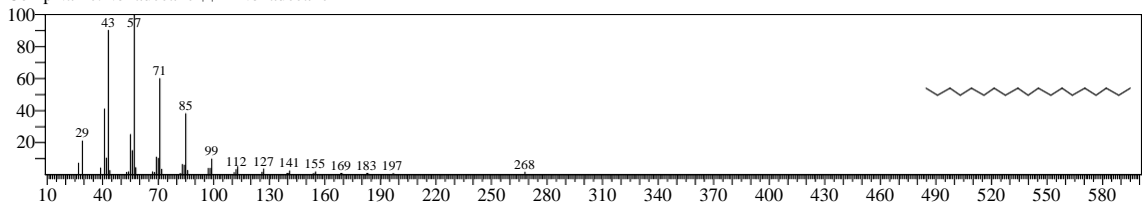

Hit#:5 Entry:25295 Library:NIST20R.lib  
SI:96 Formula:C15H32 CAS:629-62-9 MolWeight:212 RetIndex:1500  
CompName:Pentadecane \$ n-Pentadecane \$ CH3(CH2)13CH3

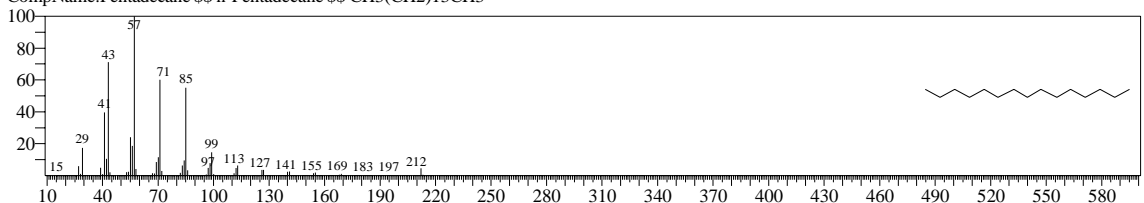

<<Target >>

Line#:5 R.Time:21.483(Scan#:1140) MassPeaks:350  
RawMode:Averaged 21.467-21.500(1139-1141) BasePeak:43.10(2755)  
BG Mode:Calc. from Peak Group 1 - Event 1 Scan

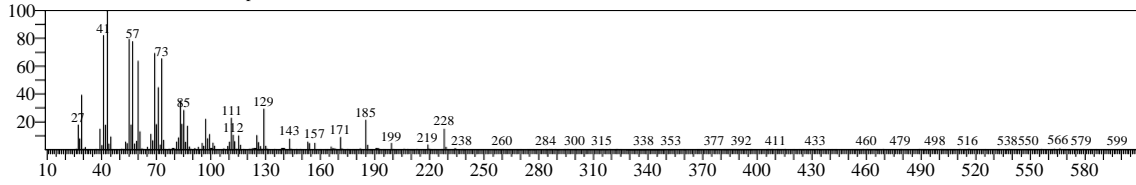

Hit#:1 Entry:36903 Library:NIST20R.lib  
SI:90 Formula:C20H40O2 CAS:506-30-9 MolWeight:312 RetIndex:2366  
CompName:Eicosanoic acid \$ Arachic acid \$ Arachidic acid \$ Icosanoic acid \$ n-Eicosanoic acid \$ Arachidic acid (synthetic)

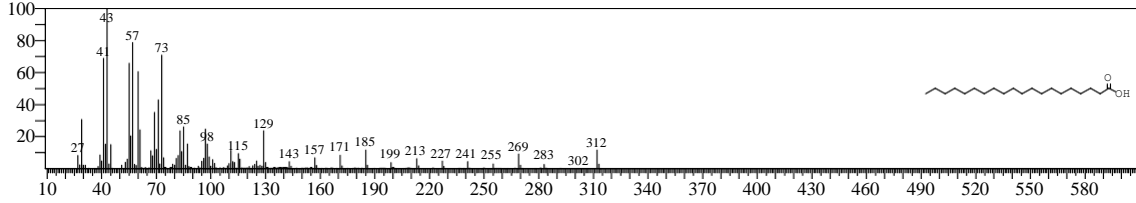

Hit#:2 Entry:96603 Library:NIST20M1.lib  
SI:89 Formula:C15H30O2 CAS:1002-84-2 MolWeight:242 RetIndex:1869  
CompName:Pentadecanoic acid \$ Pentadecylic acid \$ n-Pentadecanoic acid \$ n-Pentadecylic acid

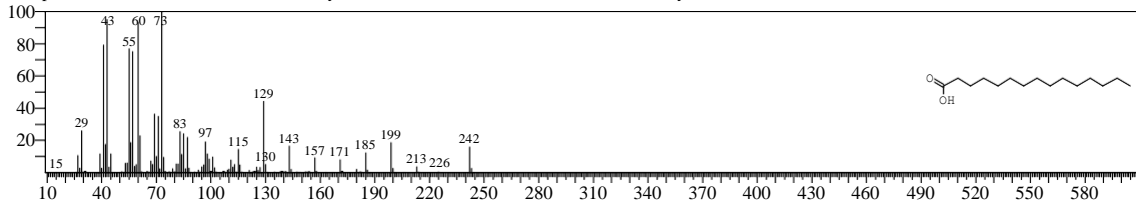

Hit#:3 Entry:28009 Library:NIST20R.lib  
SI:89 Formula:C14H28O2 CAS:544-63-8 MolWeight:228 RetIndex:1769  
CompName:Tetradecanoic acid \$ Myristic acid \$ n-Tetradecanoic acid \$ n-Tetradecic acid \$ Neo-Fat 14 \$ Univol U 316S \$ 1-Tridecanecarboxylic

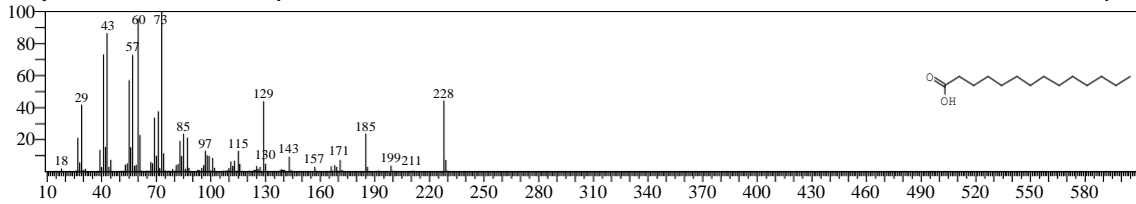

Hit#:4 Entry:81713 Library:NIST20M1.lib  
SI:89 Formula:C14H28O2 CAS:544-63-8 MolWeight:228 RetIndex:1769  
CompName:Tetradecanoic acid \$ Myristic acid \$ n-Tetradecanoic acid \$ n-Tetradecic acid \$ Neo-Fat 14 \$ Univol U 316S \$ 1-Tridecanecarboxylic

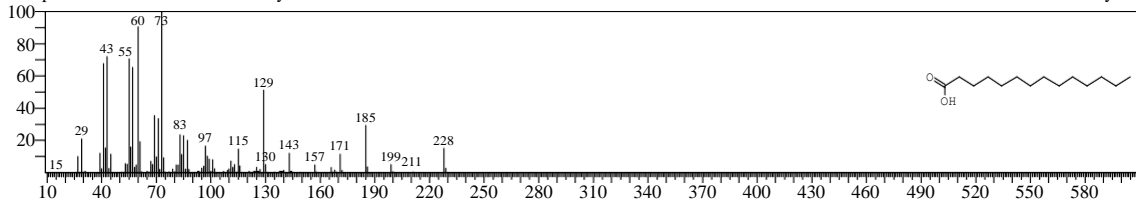

Hit#:5 Entry:34462 Library:NIST20R.lib  
SI:89 Formula:C18H36O2 CAS:57-11-4 MolWeight:284 RetIndex:2167  
CompName:Octadecanoic acid \$ Stearic acid \$ n-Octadecanoic acid \$ Humko Industrere R \$ Hydrofol Acid 150 \$ Hystrene S-97 \$ Hystrene T-70 \$

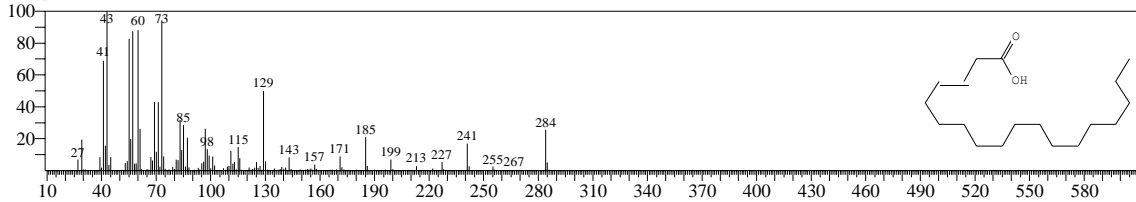

<<Target >>

Line#:6 R.Time:22.050(Scan#:1174) MassPeaks:285  
RawMode:Averaged 22.033-22.067(1173-1175) BasePeak:55.05(47646)  
BG Mode:Calc. from Peak Group 1 - Event 1 Scan

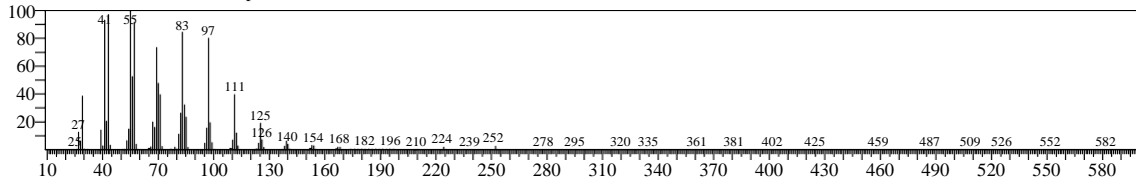

Hit#:1 Entry:107593 Library:NIST20M1.lib  
SI:97 Formula:C18H36 CAS:112-88-9 MolWeight:252 RetIndex:1801  
CompName:1-Octadecene \$\$ .alpha.-Octadecene \$\$ Octadecylene, .alpha.- \$\$ Neodene 18 \$\$ Octadec-1-ene \$\$ Octadecene-1 \$\$ Octadeca-1-ene

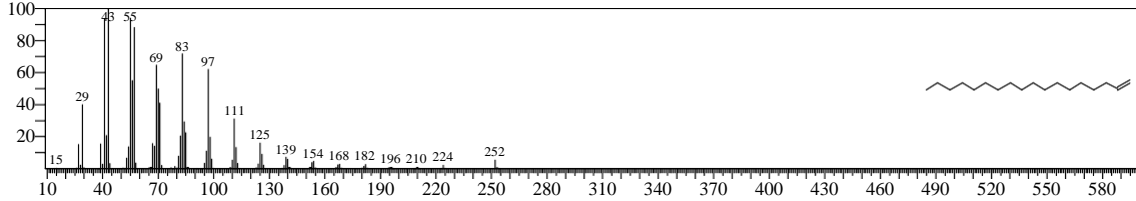

Hit#:2 Entry:32652 Library:NIST20R.lib  
SI:96 Formula:C19H38 CAS:18435-45-5 MolWeight:266 RetIndex:1900  
CompName:1-Nonadecene \$\$ Nonadec-1-ene

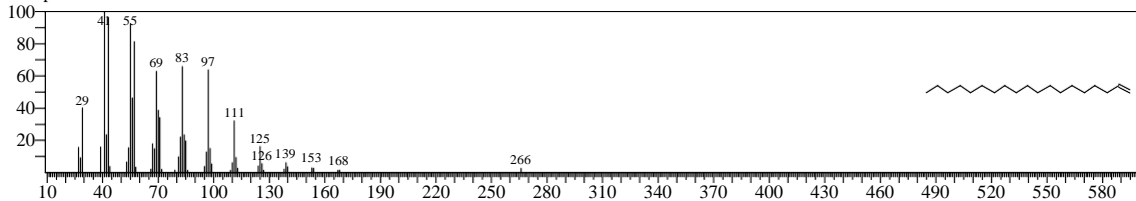

Hit#:3 Entry:156666 Library:NIST20M1.lib  
SI:96 Formula:C21H42 CAS:95008-11-0 MolWeight:294 RetIndex:2117  
CompName:10-Heneicosene (c,t) \$\$ (10E)-10-Heneicosene #

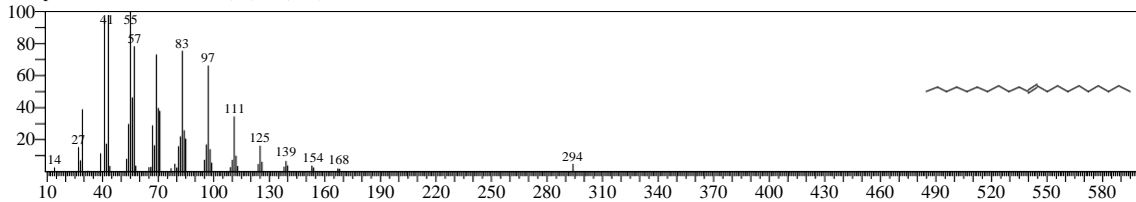

Hit#:4 Entry:31116 Library:NIST20R.lib  
SI:96 Formula:C18H36 CAS:112-88-9 MolWeight:252 RetIndex:1801  
CompName:1-Octadecene \$\$ .alpha.-Octadecene \$\$ Octadecylene, .alpha.- \$\$ Neodene 18 \$\$ Octadec-1-ene \$\$ Octadecene-1 \$\$ Octadeca-1-ene

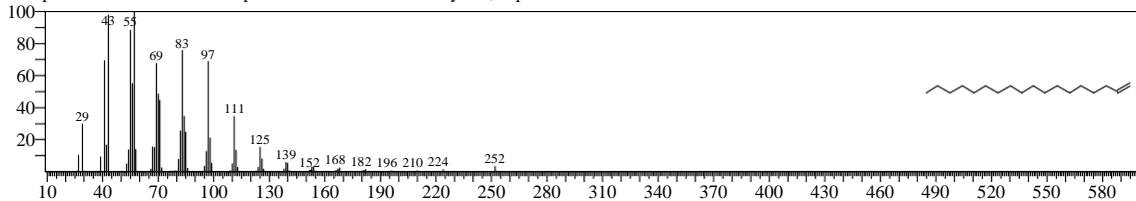

Hit#:5 Entry:29353 Library:NIST20R.lib  
SI:96 Formula:C17H34 CAS:6765-39-5 MolWeight:238 RetIndex:1701  
CompName:1-Heptadecene \$\$ Hexahydroaplotaxene \$\$ Heptadec-1-ene \$\$ NSC 77132 \$\$ Heptadecene (Related)

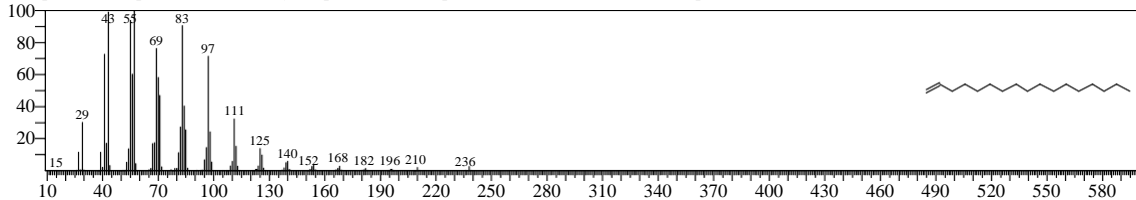

<<Target >>

Line#:7 R.Time:22.400(Scan#:1195) MassPeaks:264  
RawMode:Averaged 22.383-22.417(1194-1196) BasePeak:43.10(6225)  
BG Mode:Calc. from Peak Group 1 - Event 1 Scan

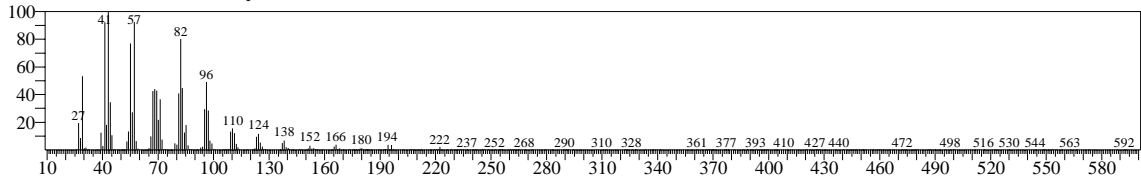

Hit#:1 Entry:125846 Library:NIST20M1.lib  
SI:96 Formula:C18H36O CAS:638-66-4 MolWeight:268 RetIndex:1999  
CompName:Octadecanal \$\$ Stearaldehyde \$\$ Octadecyl aldehyde \$\$ Stearyl aldehyde \$\$ n-Octadecanal

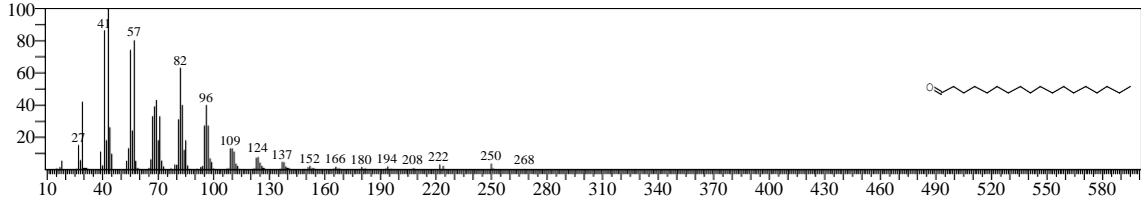

Hit#:2 Entry:25275 Library:NIST20R.lib  
SI:96 Formula:C14H28O CAS:124-25-4 MolWeight:212 RetIndex:1601  
CompName:Tetradecanal \$\$ Myristaldehyde \$\$ Myristylaldehyde \$\$ Tetradecylaldehyde \$\$ n-Tetradecanal \$\$ Aldehyde C-14 \$\$ Aldehyde C-14, myristic \$

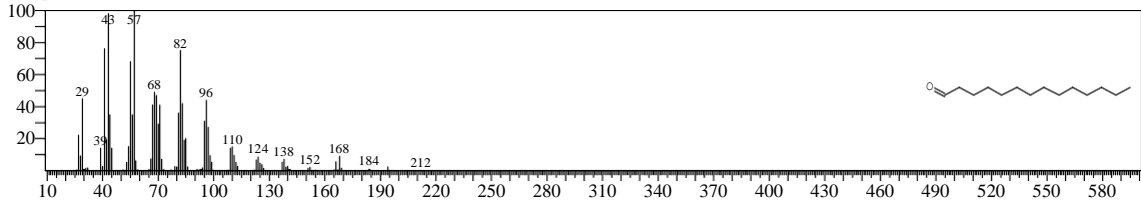

Hit#:3 Entry:25276 Library:NIST20R.lib  
SI:96 Formula:C14H28O CAS:124-25-4 MolWeight:212 RetIndex:1601  
CompName:Tetradecanal \$\$ Myristaldehyde \$\$ Myristylaldehyde \$\$ Tetradecylaldehyde \$\$ n-Tetradecanal \$\$ Aldehyde C-14 \$\$ Aldehyde C-14, myristic \$

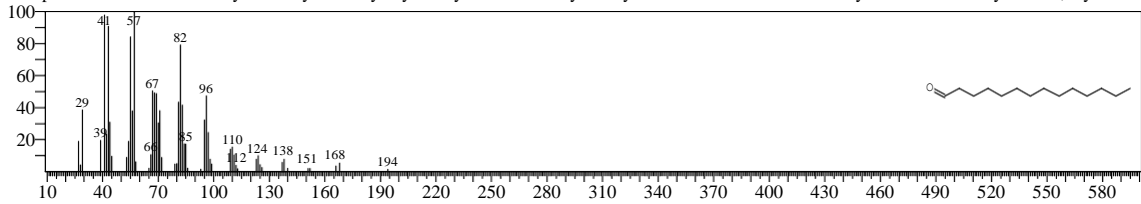

Hit#:4 Entry:25278 Library:NIST20R.lib  
SI:95 Formula:C14H28O CAS:124-25-4 MolWeight:212 RetIndex:1601  
CompName:Tetradecanal \$\$ Myristaldehyde \$\$ Myristylaldehyde \$\$ Tetradecylaldehyde \$\$ n-Tetradecanal \$\$ Aldehyde C-14 \$\$ Aldehyde C-14, myristic \$

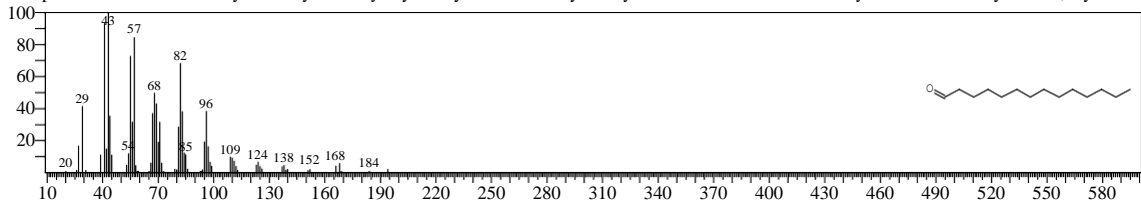

Hit#:5 Entry:109833 Library:NIST20M1.lib  
SI:95 Formula:C17H34O CAS:0-00-0 MolWeight:254 RetIndex:1899  
CompName:Heptadecanal

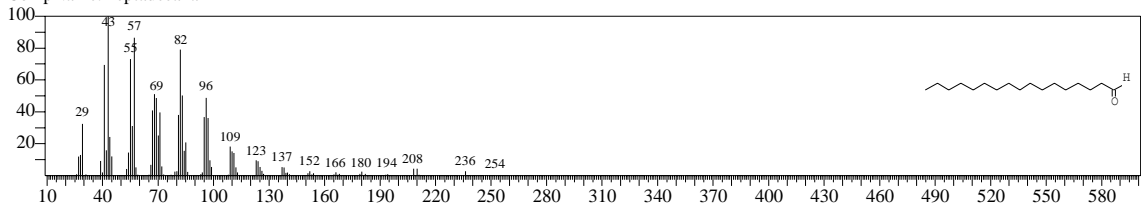



<<Target >>

Line#:8 R.Time:23.683(Scan#:1272) MassPeaks:296  
RawMode:Averaged 23.667-23.700(1271-1273) BasePeak:178.05(2888)  
BG Mode:Calc. from Peak Group 1 - Event 1 Scan

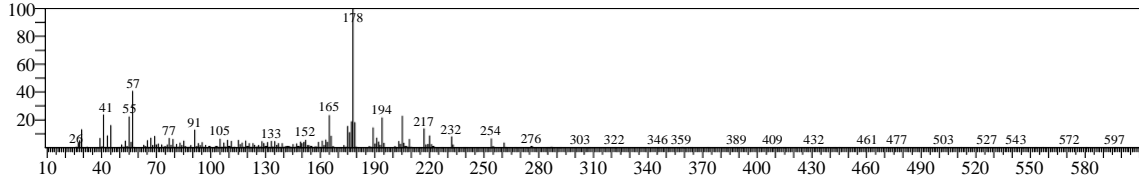

Hit#1 Entry:135154 Library:NIST20M1.lib

SI:64 Formula:C17H24O3 CAS:82304-66-3 MolWeight:276 RetIndex:2081

CompName:7,9-Di-tert-butyl-1-oxaspiro(4,5)deca-6,9-diene-2,8-dione \$ 1-Oxa-spiro[4.5]deca-6,9-diene-2,8-dione, 7,9-di-tert-butyl- \$ 7,9-Di-tert-butyl-1

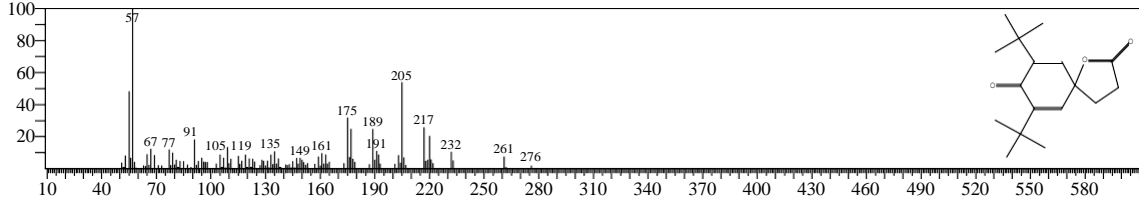

Hit#2 Entry:33672 Library:NIST20R.lib

SI:63 Formula:C17H24O3 CAS:82304-66-3 MolWeight:276 RetIndex:2081

CompName:7,9-Di-tert-butyl-1-oxaspiro(4,5)deca-6,9-diene-2,8-dione \$ 1-Oxa-spiro[4.5]deca-6,9-diene-2,8-dione, 7,9-di-tert-butyl- \$ 7,9-Di-tert-butyl-1

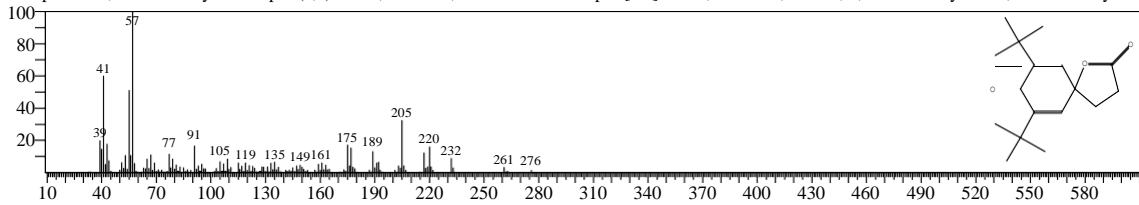

Hit#3 Entry:222371 Library:NIST20M1.lib

SI:62 Formula:C22H25ClSi CAS:0-00-0 MolWeight:352 RetIndex:2151

CompName:2-Silabicyclo[2.2.2]-[5.6.7.8]dibenzo-2-chlor-3-neopentyl-2-vinyl-octa-5,7-diene

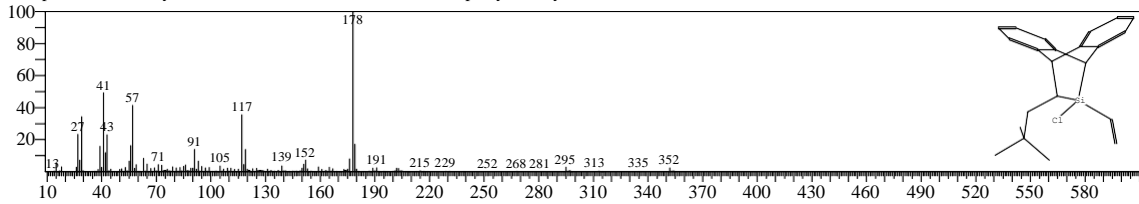

Hit#4 Entry:72563 Library:NIST20M1.lib

SI:61 Formula:C13H16O3 CAS:84945-01-7 MolWeight:220 RetIndex:1974

CompName:Coumarin-6-ol, 3,4-dihydro-4,4,7,8-tetramethyl- \$ 6-Hydroxy-4,4,7,8-tetramethyl-2-chromanone #

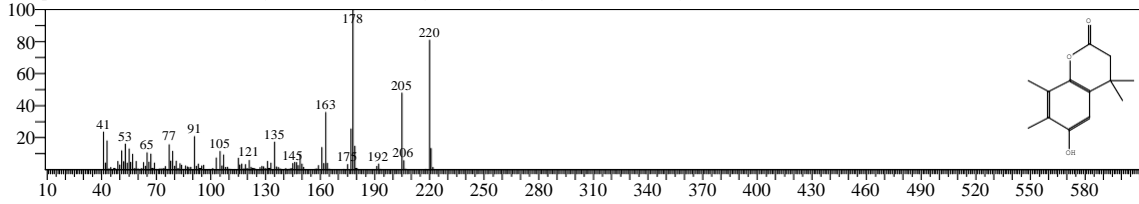

Hit#5 Entry:224623 Library:NIST20M1.lib

SI:61 Formula:C24H34O2 CAS:27996-19-6 MolWeight:354 RetIndex:2757

CompName:2-tert-Butyl-6-(3-tert-butyl-2-methoxy-5-methylbenzyl)-4-methylphenol

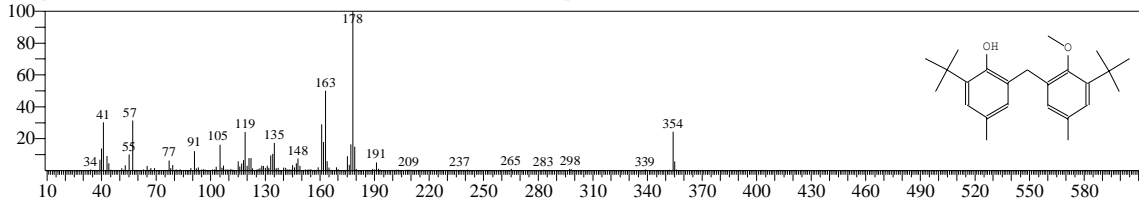

<<Target >>

Line#:9 R.Time:24.483(Scan#:1320) MassPeaks:439  
RawMode:Averaged 24.467-24.500(1319-1321) BasePeak:43.10(8508)  
BG Mode:Calc. from Peak Group 1 - Event 1 Scan

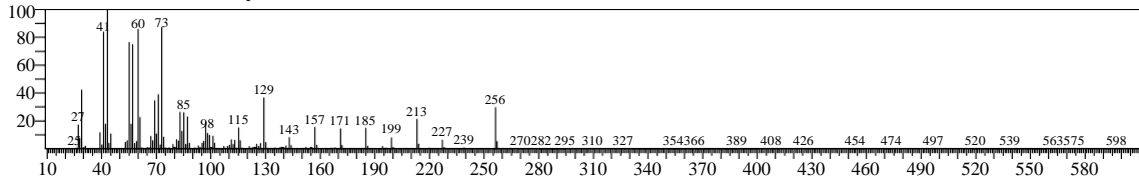

Hit#:1 Entry:31598 Library:NIST20R.lib  
SI:96 Formula:C16H32O2 CAS:57-10-3 MolWeight:256 RetIndex:1968  
CompName:n-Hexadecanoic acid \$ Hexadecanoic acid \$ n-Hexadecioic acid \$ Palmitic acid \$ Pentadecanecarboxylic acid \$ 1-Pentadecanecarboxylic

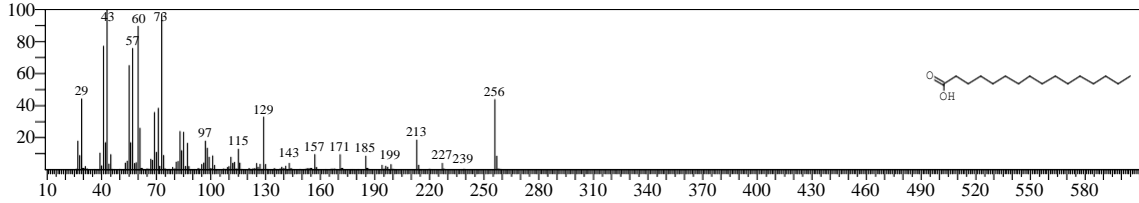

Hit#:2 Entry:31601 Library:NIST20R.lib  
SI:95 Formula:C16H32O2 CAS:57-10-3 MolWeight:256 RetIndex:1968  
CompName:n-Hexadecanoic acid \$ Hexadecanoic acid \$ n-Hexadecioic acid \$ Palmitic acid \$ Pentadecanecarboxylic acid \$ 1-Pentadecanecarboxylic

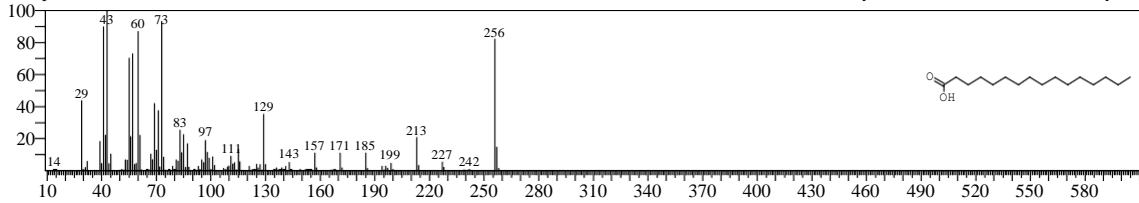

Hit#:3 Entry:96603 Library:NIST20M1.lib  
SI:94 Formula:C15H30O2 CAS:1002-84-2 MolWeight:242 RetIndex:1869  
CompName:Pentadecanoic acid \$ Pentadecylic acid \$ n-Pentadecanoic acid \$ n-Pentadecylic acid

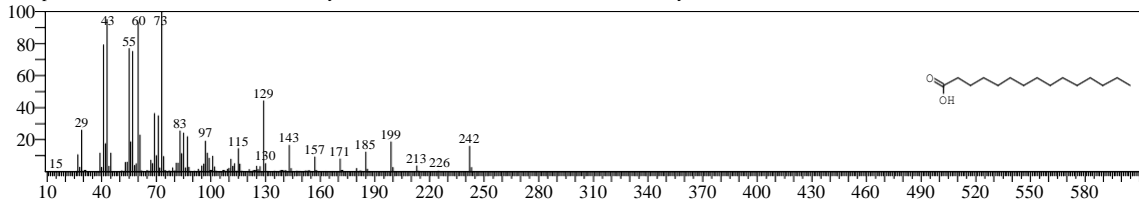

Hit#:4 Entry:112116 Library:NIST20M1.lib  
SI:93 Formula:C16H32O2 CAS:57-10-3 MolWeight:256 RetIndex:1968  
CompName:n-Hexadecanoic acid \$ Hexadecanoic acid \$ n-Hexadecioic acid \$ Palmitic acid \$ Pentadecanecarboxylic acid \$ 1-Pentadecanecarboxylic

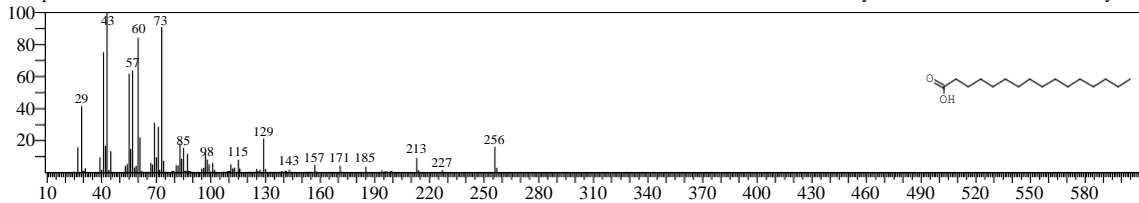

Hit#:5 Entry:31599 Library:NIST20R.lib  
SI:92 Formula:C16H32O2 CAS:57-10-3 MolWeight:256 RetIndex:1968  
CompName:n-Hexadecanoic acid \$ Hexadecanoic acid \$ n-Hexadecioic acid \$ Palmitic acid \$ Pentadecanecarboxylic acid \$ 1-Pentadecanecarboxylic

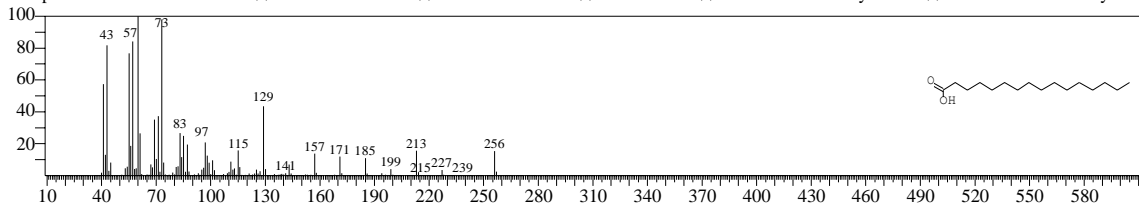

<<Target >>

Line#:10 R.Time:24.967(Scan#:1349) MassPeaks:314  
RawMode:Averaged 24.950-24.983(1348-1350) BasePeak:43.10(34906)  
BG Mode:Calc. from Peak Group 1 - Event 1 Scan

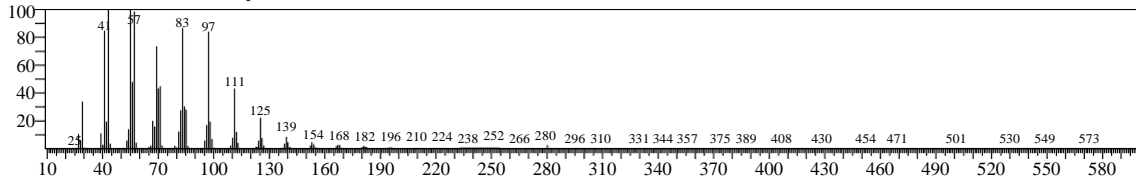

Hit#:1 Entry:38649 Library:NIST20R.lib  
SI:96 Formula:C24H48 CAS:10192-32-2 MolWeight:336 RetIndex:2397  
CompName:1-Tetracosene

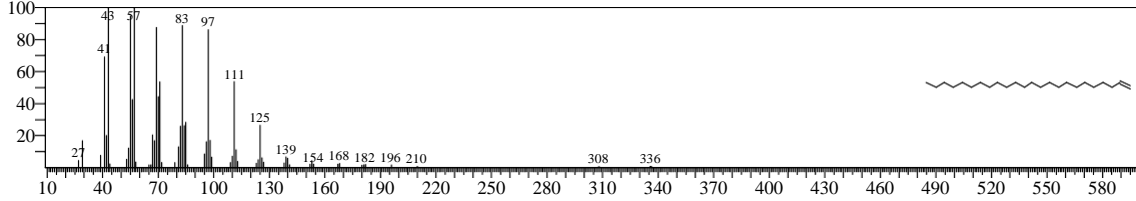

Hit#:2 Entry:32651 Library:NIST20R.lib  
SI:96 Formula:C19H38 CAS:18435-45-5 MolWeight:266 RetIndex:1900  
CompName:1-Nonadecene \$\$ Nonadec-1-ene

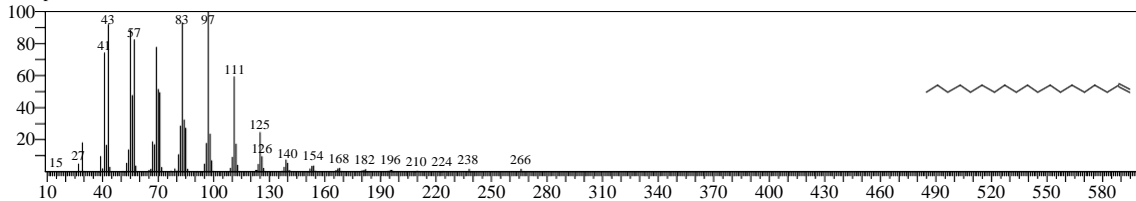

Hit#:3 Entry:29353 Library:NIST20R.lib  
SI:96 Formula:C17H34 CAS:6765-39-5 MolWeight:238 RetIndex:1701  
CompName:1-Heptadecene \$\$ Hexahydroaplotaxene \$\$ Heptadec-1-ene \$\$ NSC 77132 \$\$ Heptadecene (Related)

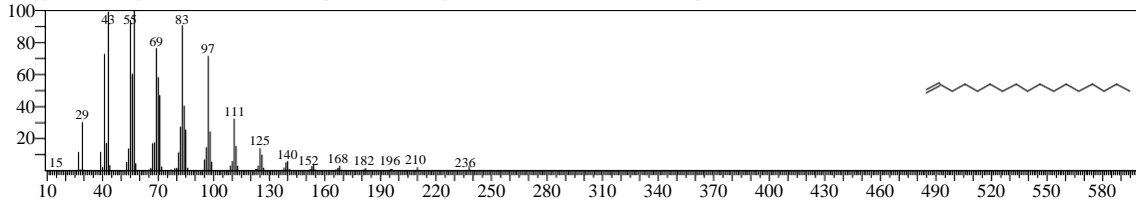

Hit#:4 Entry:40183 Library:NIST20R.lib  
SI:96 Formula:C26H52 CAS:18835-33-1 MolWeight:364 RetIndex:2596  
CompName:1-Hexacosene

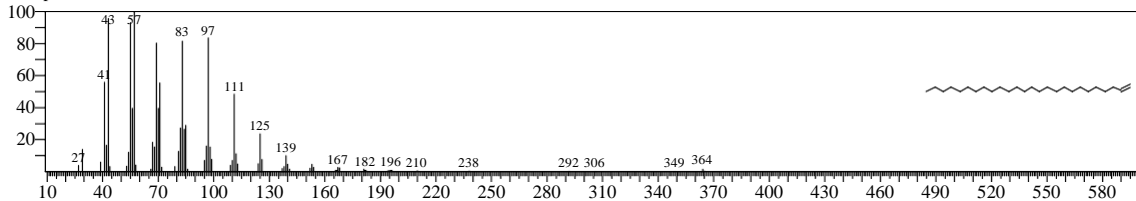

Hit#:5 Entry:37645 Library:NIST20R.lib  
SI:96 Formula:C23H46 CAS:27519-02-4 MolWeight:322 RetIndex:2315  
CompName:9-Tricosene, (Z)- \$\$ (Z)-9-Tricosene \$\$ cis-9-Tricosene \$\$ Muscalure \$\$ (9Z)-Tricosene \$\$ (9Z)-9-Tricosene #

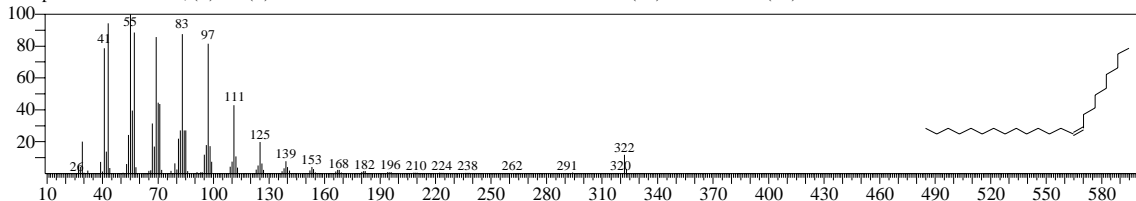

<<Target >>

Line#:11 R.Time:25.050(Scan#:1354) MassPeaks:319  
RawMode:Averaged 25.033-25.067(1353-1355) BasePeak:43.10(1600)  
BG Mode:Calc. from Peak Group 1 - Event 1 Scan

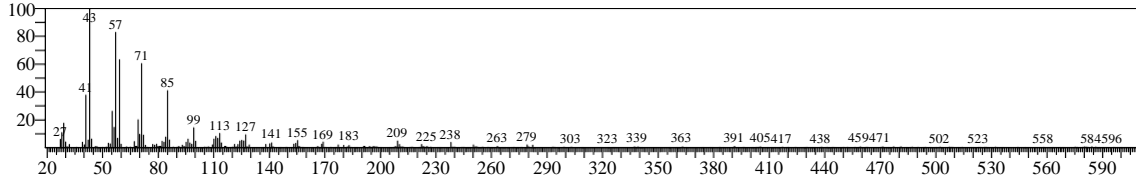

Hit#:1 Entry:248622 Library:NIST20M1.lib  
SI:87 Formula:C24H46O3 CAS:0-00-0 MolWeight:382 RetIndex:2617  
CompName:Carbonic acid, eicosyl prop-1-en-2-yl ester

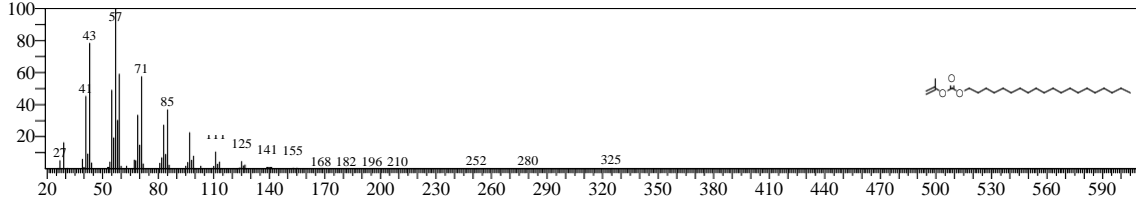

Hit#:2 Entry:224510 Library:NIST20M1.lib  
SI:86 Formula:C22H42O3 CAS:0-00-0 MolWeight:354 RetIndex:2418  
CompName:Carbonic acid, octadecyl prop-1-en-2-yl ester

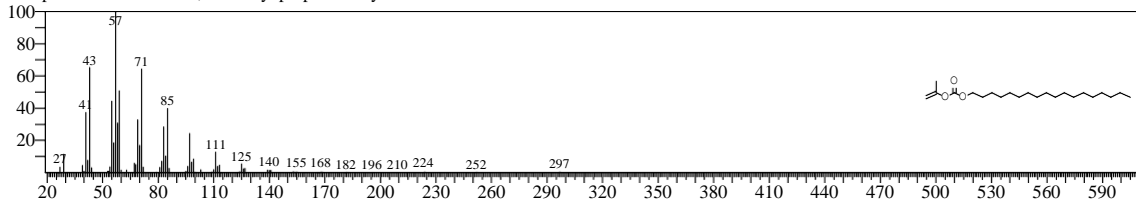

Hit#:3 Entry:210056 Library:NIST20M1.lib  
SI:86 Formula:C21H40O3 CAS:0-00-0 MolWeight:340 RetIndex:2319  
CompName:Carbonic acid, heptadecyl prop-1-en-2-yl ester

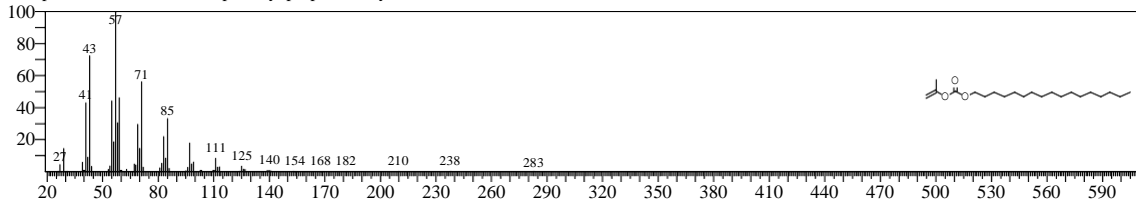

Hit#:4 Entry:161493 Library:NIST20M1.lib  
SI:86 Formula:C18H34O3 CAS:0-00-0 MolWeight:298 RetIndex:2021  
CompName:Carbonic acid, prop-1-en-2-yl tetradecyl ester

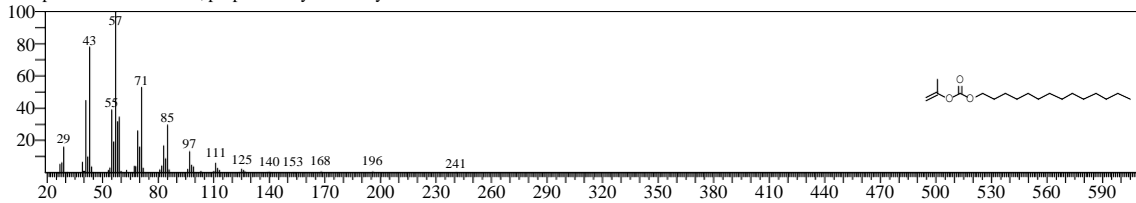

Hit#:5 Entry:142257 Library:NIST20M1.lib  
SI:86 Formula:C20H42 CAS:1560-86-7 MolWeight:282 RetIndex:1945  
CompName:Nonadecane, 2-methyl- 2-Methylnonadecane

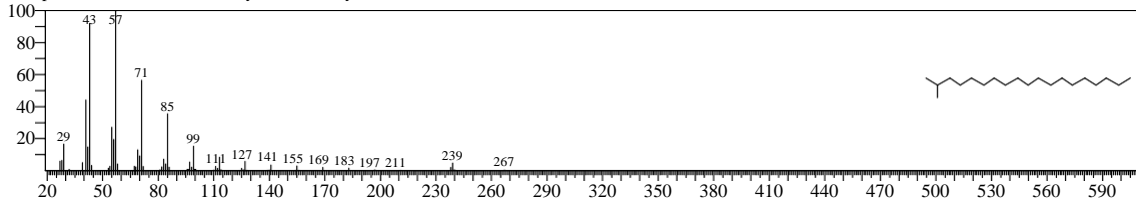

<<Target >>

Line#:12 R.Time:25.333(Scan#:1371) MassPeaks:324  
RawMode:Averaged 25.317-25.350(1370-1372) BasePeak:43.10(14398)  
BG Mode:Calc. from Peak Group 1 - Event 1 Scan

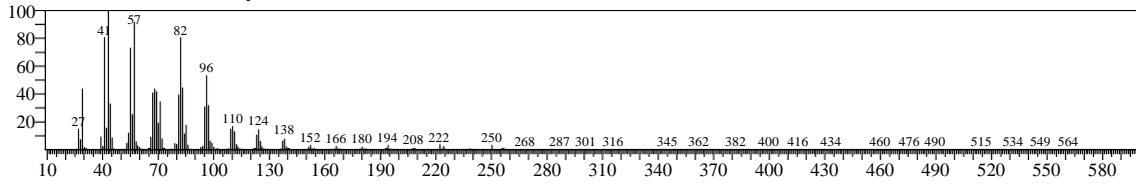

Hit#:1 Entry:125846 Library:NIST20M1.lib  
SI:96 Formula:C18H36O CAS:638-66-4 MolWeight:268 RetIndex:1999  
CompName:Octadecanal \$\$ Stearaldehyde \$\$ Octadecyl aldehyde \$\$ Stearyl aldehyde \$\$ n-Octadecanal

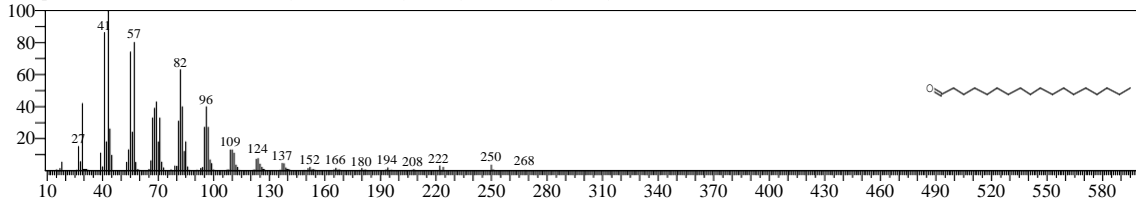

Hit#:2 Entry:109833 Library:NIST20M1.lib  
SI:96 Formula:C17H34O CAS:0-00-0 MolWeight:254 RetIndex:1899  
CompName:Heptadecanal

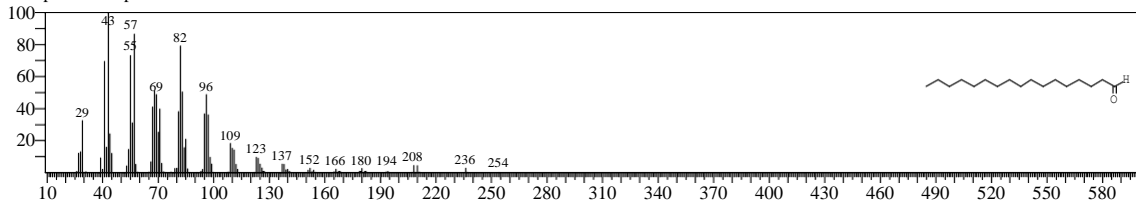

Hit#:3 Entry:25275 Library:NIST20R.lib  
SI:95 Formula:C14H28O CAS:124-25-4 MolWeight:212 RetIndex:1601  
CompName:Tetradecanal \$\$ Myristaldehyde \$\$ Myristylaldehyde \$\$ Tetracylaldehyde \$\$ n-Tetradecanal \$\$ Aldehyde C-14 \$\$ Aldehyde C-14, myristic \$

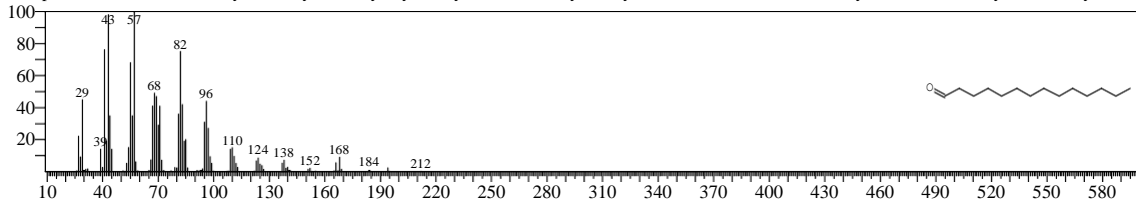

Hit#:4 Entry:25276 Library:NIST20R.lib  
SI:95 Formula:C14H28O CAS:124-25-4 MolWeight:212 RetIndex:1601  
CompName:Tetradecanal \$\$ Myristaldehyde \$\$ Myristylaldehyde \$\$ Tetracylaldehyde \$\$ n-Tetradecanal \$\$ Aldehyde C-14 \$\$ Aldehyde C-14, myristic \$

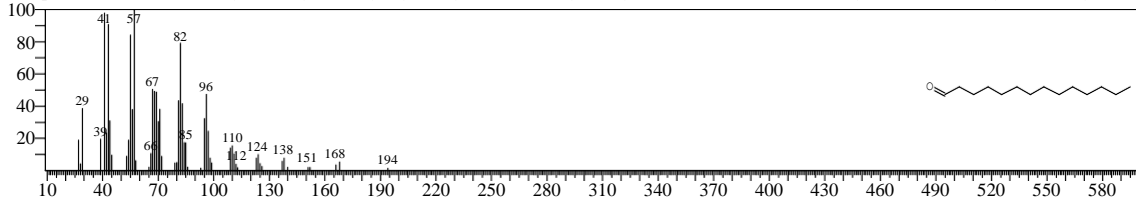

Hit#:5 Entry:32890 Library:NIST20R.lib  
SI:95 Formula:C18H36O CAS:638-66-4 MolWeight:268 RetIndex:1999  
CompName:Octadecanal \$\$ Stearaldehyde \$\$ Octadecyl aldehyde \$\$ Stearyl aldehyde \$\$ n-Octadecanal

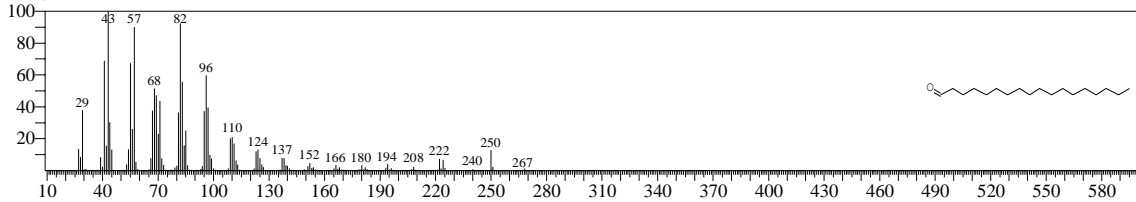

<<Target >>

Line#:13 R.Time:26.450(Scan#:1438) MassPeaks:314  
RawMode:Averaged 26.433-26.467(1437-1439) BasePeak:57.10(3008)  
BG Mode:Calc. from Peak Group 1 - Event 1 Scan

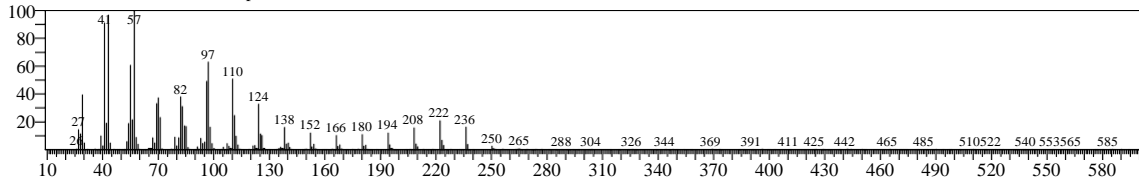

Hit#:1 Entry:32527 Library:NIST20R.lib  
SI:94 Formula:C18H35N CAS:638-65-3 MolWeight:265 RetIndex:2056  
CompName:Octadecanenitrile \$\$ Stearonitrile \$\$ Heptadecyl cyanide \$\$ Nitril kyseliny stearove \$\$ 1-Cyanoheptadecane \$\$ Octadecanenitrile \$\$ Oktadeka

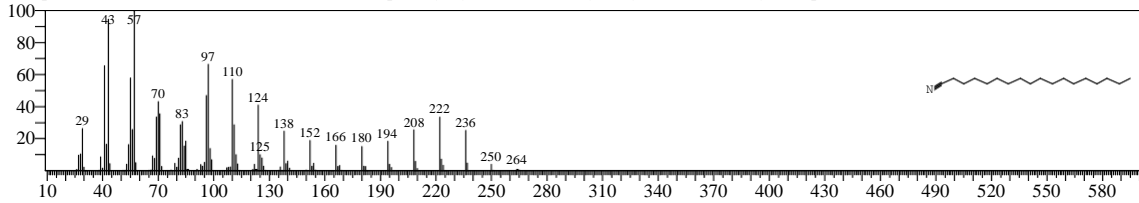

Hit#:2 Entry:30956 Library:NIST20R.lib  
SI:93 Formula:C17H33N CAS:5399-02-0 MolWeight:251 RetIndex:1956  
CompName:Heptadecanenitrile \$\$ Hexadecyl cyanide \$\$ Heptadecanenitrile \$\$ Heptadecanoic acid nitrile \$\$ Cetyl cyanide \$\$ 1-Cyanoheptadecane \$\$ Mar

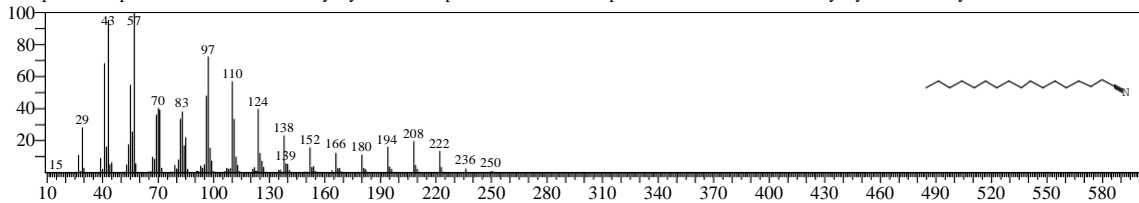

Hit#:3 Entry:29157 Library:NIST20R.lib  
SI:93 Formula:C16H31N CAS:629-79-8 MolWeight:237 RetIndex:1857  
CompName:Hexadecanenitrile \$\$ Palmitonitrile \$\$ Palmitic acid, nitrile \$\$ 1-Cyanopentadecane

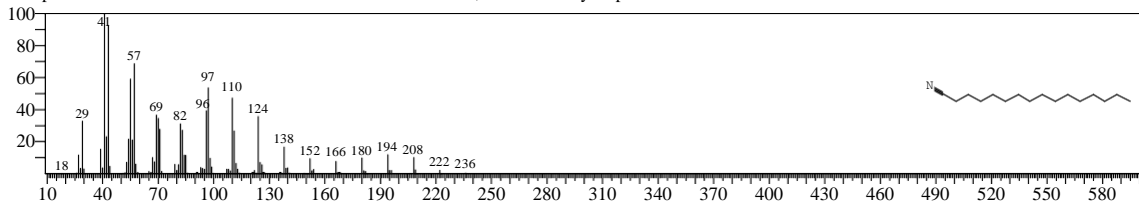

Hit#:4 Entry:29155 Library:NIST20R.lib  
SI:92 Formula:C16H31N CAS:629-79-8 MolWeight:237 RetIndex:1857  
CompName:Hexadecanenitrile \$\$ Palmitonitrile \$\$ Palmitic acid, nitrile \$\$ 1-Cyanopentadecane

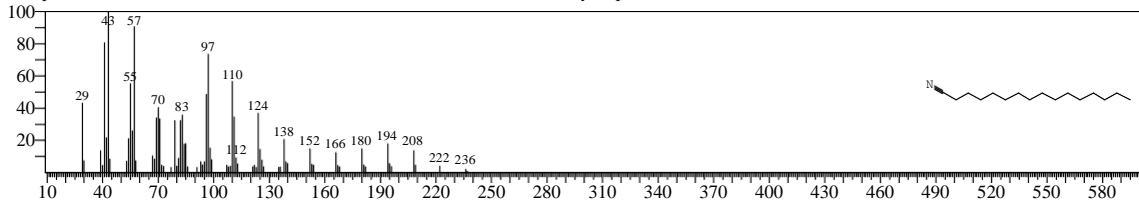

Hit#:5 Entry:27174 Library:NIST20R.lib  
SI:92 Formula:C15H29N CAS:18300-91-9 MolWeight:223 RetIndex:1758  
CompName:Pentadecanenitrile \$\$ Tetradecyl cyanide \$\$ Pentadecanenitrile \$\$ n-Pentadecanenitrile \$\$ Pentadecanenitrile

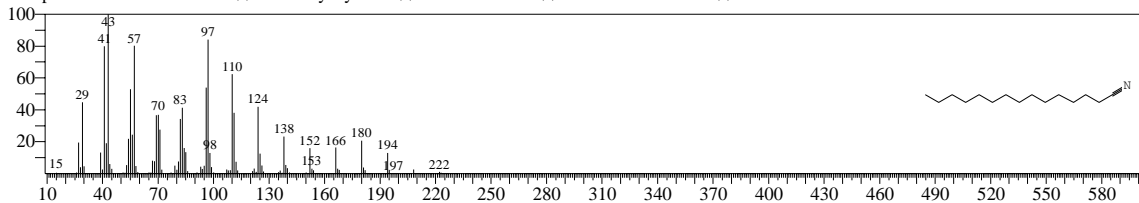

<<Target >>

Line#:14 R.Time:27.183(Scan#:1482) MassPeaks:321  
RawMode:Averaged 27.167-27.200(1481-1483) BasePeak:43.10(1146)  
BG Mode:Calc. from Peak Group 1 - Event 1 Scan

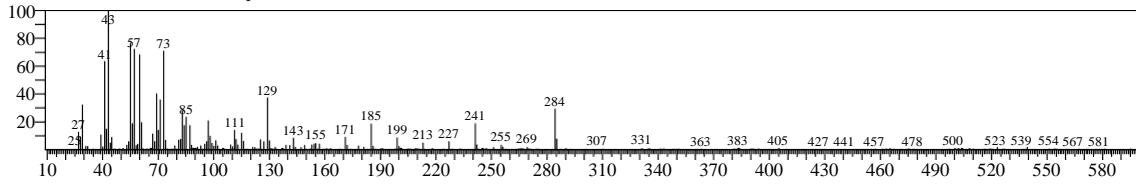

Hit#:1 Entry:34460 Library:NIST20R.lib  
SI:94 Formula:C18H36O2 CAS:57-11-4 MolWeight:284 RetIndex:2167  
CompName:Octadecanoic acid \$\$ Stearic acid \$\$ n-Octadecanoic acid \$\$ Humko Industrene R \$\$ Hydrofol Acid 150 \$\$ Hystrene S-97 \$\$ Hystrene T-70 \$

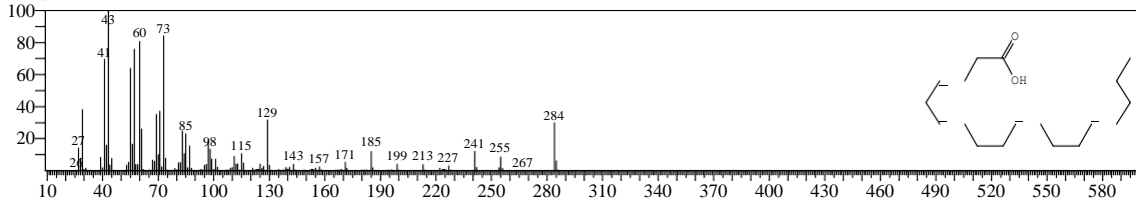

Hit#:2 Entry:34462 Library:NIST20R.lib  
SI:94 Formula:C18H36O2 CAS:57-11-4 MolWeight:284 RetIndex:2167  
CompName:Octadecanoic acid \$\$ Stearic acid \$\$ n-Octadecanoic acid \$\$ Humko Industrene R \$\$ Hydrofol Acid 150 \$\$ Hystrene S-97 \$\$ Hystrene T-70 \$

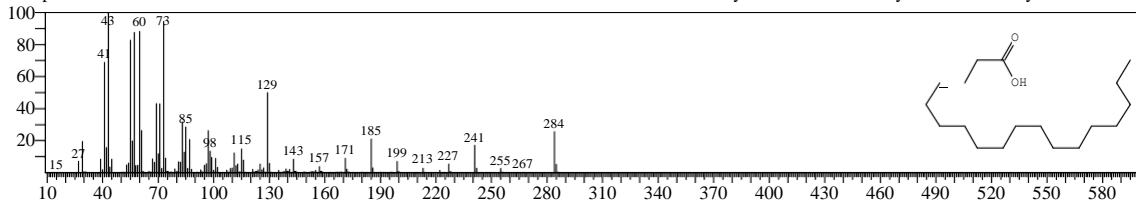

Hit#:3 Entry:34461 Library:NIST20R.lib  
SI:93 Formula:C18H36O2 CAS:57-11-4 MolWeight:284 RetIndex:2167  
CompName:Octadecanoic acid \$\$ Stearic acid \$\$ n-Octadecanoic acid \$\$ Humko Industrene R \$\$ Hydrofol Acid 150 \$\$ Hystrene S-97 \$\$ Hystrene T-70 \$

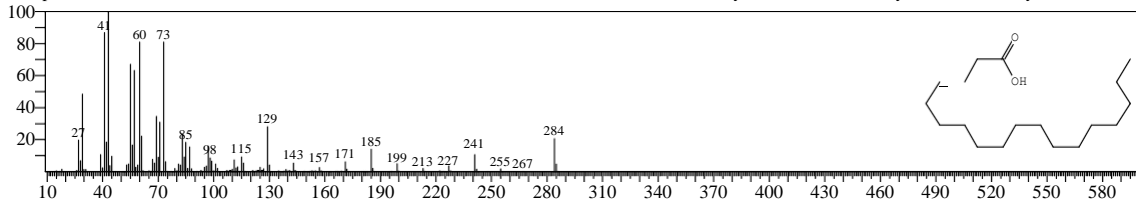

Hit#:4 Entry:144781 Library:NIST20M1.lib  
SI:92 Formula:C18H36O2 CAS:57-11-4 MolWeight:284 RetIndex:2167  
CompName:Octadecanoic acid \$\$ Stearic acid \$\$ n-Octadecanoic acid \$\$ Humko Industrene R \$\$ Hydrofol Acid 150 \$\$ Hystrene S-97 \$\$ Hystrene T-70 \$

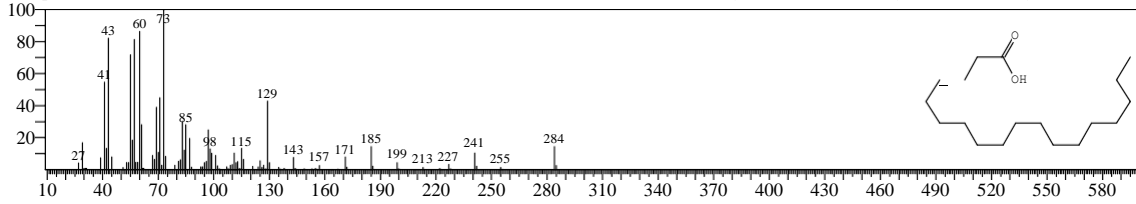

Hit#:5 Entry:36903 Library:NIST20R.lib  
SI:91 Formula:C20H40O2 CAS:506-30-9 MolWeight:312 RetIndex:2366  
CompName:Eicosanoic acid \$\$ Arachidic acid \$\$ Arachidic acid \$\$ Icosanoic acid \$\$ n-Eicosanoic acid \$\$ Arachidic acid (synthetic)

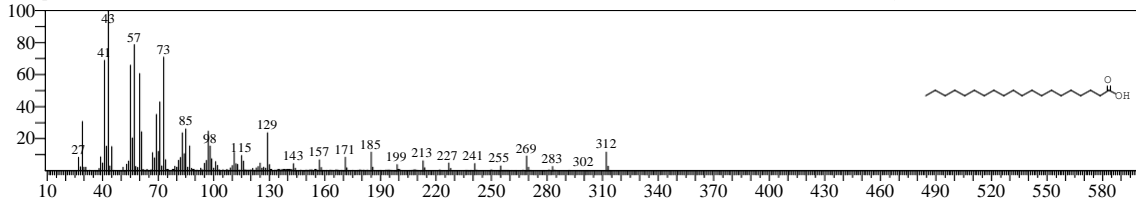

<<Target >>

Line#:15 R.Time:27.633(Scan#:1509) MassPeaks:309  
RawMode:Averaged 27.617-27.650(1508-1510) BasePeak:57.10(20442)  
BG Mode:Calc. from Peak Group 1 - Event 1 Scan

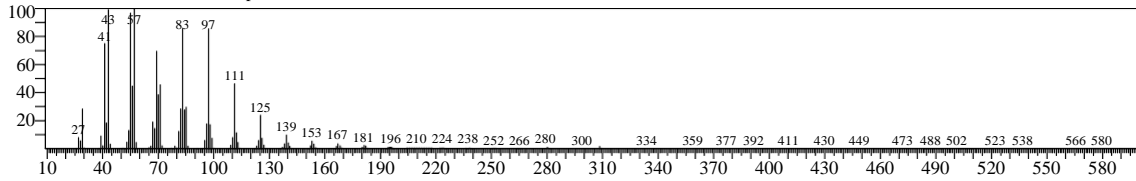

Hit#:1 Entry:38649 Library:NIST20R.lib  
SI:97 Formula:C24H48 CAS:10192-32-2 MolWeight:336 RetIndex:2397  
CompName:1-Tetracosene

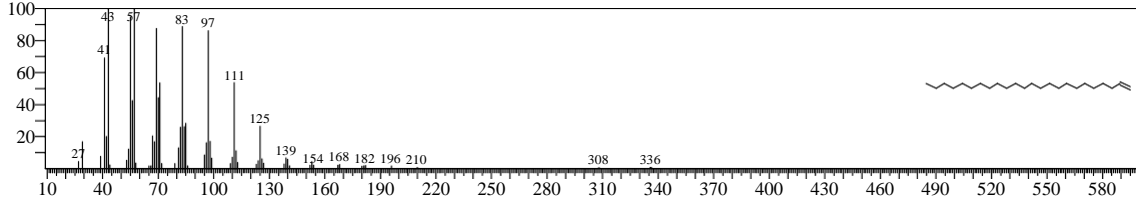

Hit#:2 Entry:40183 Library:NIST20R.lib  
SI:97 Formula:C26H52 CAS:18835-33-1 MolWeight:364 RetIndex:2596  
CompName:1-Hexacosene

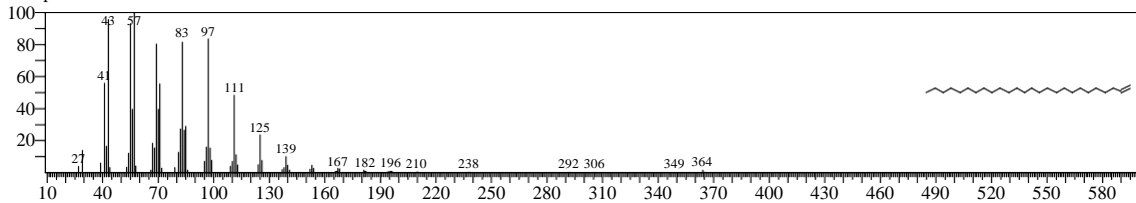

Hit#:3 Entry:32651 Library:NIST20R.lib  
SI:96 Formula:C19H38 CAS:18435-45-5 MolWeight:266 RetIndex:1900  
CompName:1-Nonadecene \$\$ Nonadec-1-ene

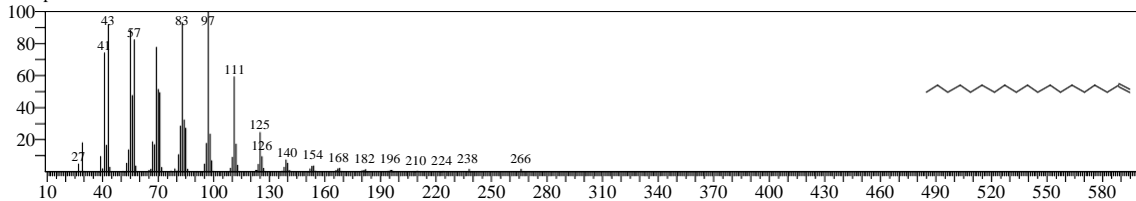

Hit#:4 Entry:178229 Library:NIST20M1.lib  
SI:96 Formula:C21H44O CAS:15594-90-8 MolWeight:312 RetIndex:2351  
CompName:1-Heneicosanol \$\$ Heneicosan-1-ol \$\$ Heneicosyl alcohol

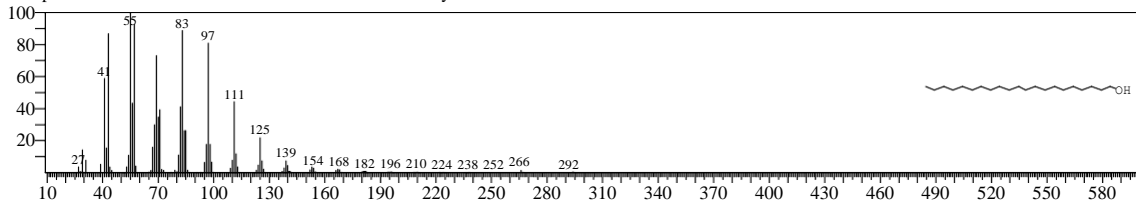

Hit#:5 Entry:37648 Library:NIST20R.lib  
SI:96 Formula:C23H46 CAS:18835-32-0 MolWeight:322 RetIndex:2298  
CompName:1-Tricosene \$\$ Tricosene-1

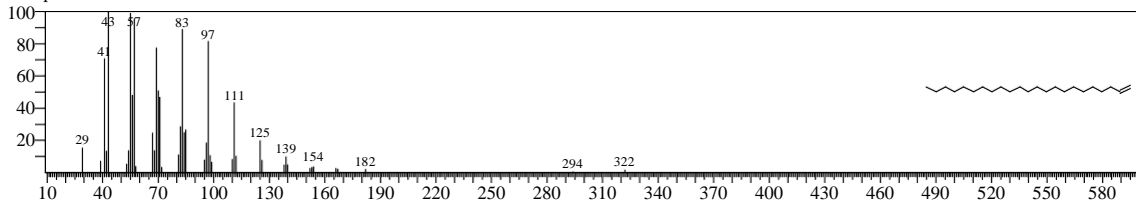



<<Target >>

Line#:16 R.Time:30.067(Scan#:1655) MassPeaks:289  
RawMode:Averaged 30.050-30.083(1654-1656) BasePeak:57.10(11954)  
BG Mode:Calc. from Peak Group 1 - Event 1 Scan

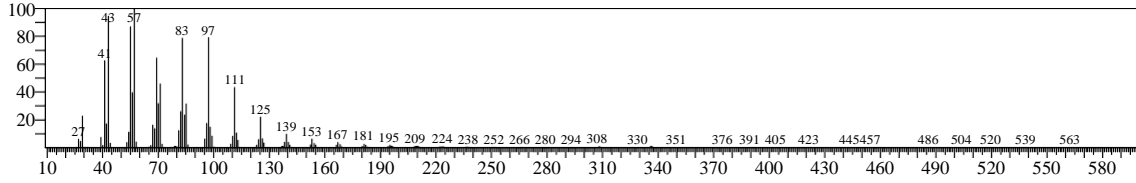

Hit#:1 Entry:40183 Library:NIST20R.lib  
SI:97 Formula:C26H52 CAS:18835-33-1 MolWeight:364 RetIndex:2596  
CompName:1-Hexacosene

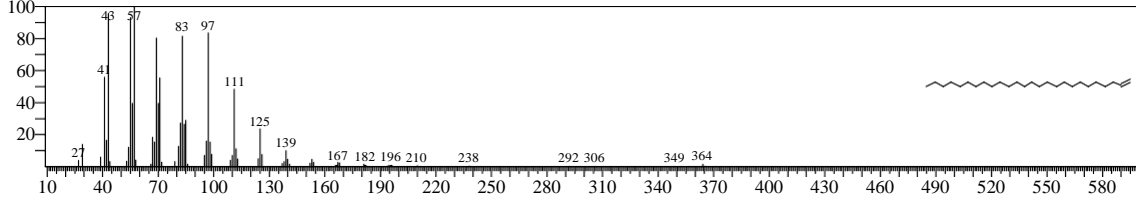

Hit#:2 Entry:221995 Library:NIST20M1.lib  
SI:97 Formula:C19H35F3O2 CAS:0-00-0 MolWeight:352 RetIndex:1911  
CompName:Heptadecyl trifluoroacetate \$\$ Heptadecyl 2,2,2-trifluoroacetate \$\$ 1-Heptadecanol, trifluoroacetate \$\$ Trifluoroacetic acid, n-heptadecyl ester

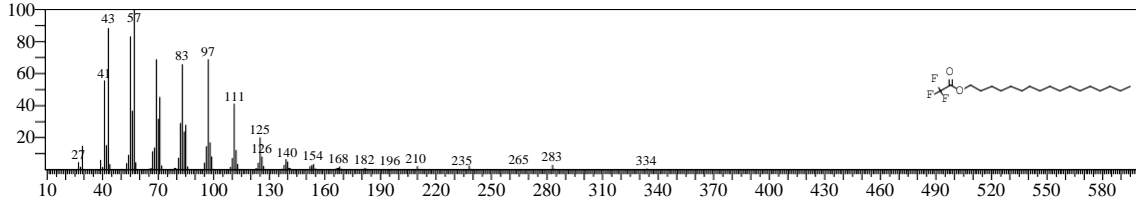

Hit#:3 Entry:207144 Library:NIST20M1.lib  
SI:96 Formula:C18H33F3O2 CAS:6222-03-3 MolWeight:338 RetIndex:1812  
CompName:Trifluoroacetoxy hexadecane \$\$ Hexadecyl trifluoroacetate \$\$ Hexadecyl 2,2,2-trifluoroacetate \$\$ 1-Hexadecanol, trifluoroacetate \$\$ Acetic ac

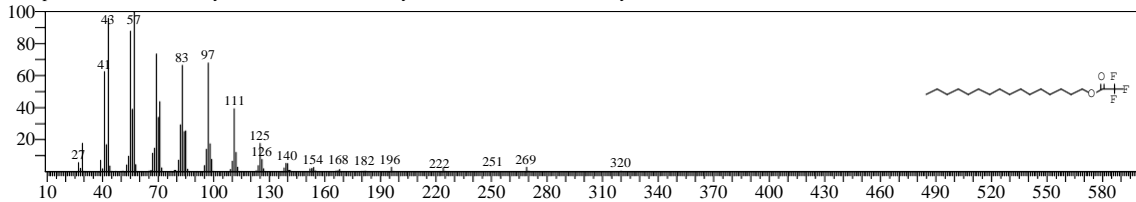

Hit#:4 Entry:234861 Library:NIST20M1.lib  
SI:96 Formula:C20H37F3O2 CAS:79392-43-1 MolWeight:366 RetIndex:2011  
CompName:Octadecyl trifluoroacetate \$\$ Octadecyl 2,2,2-trifluoroacetate \$\$ 1-Octadecanol, trifluoroacetate \$\$ Trifluoroacetic acid, n-octadecyl ester \$\$ A

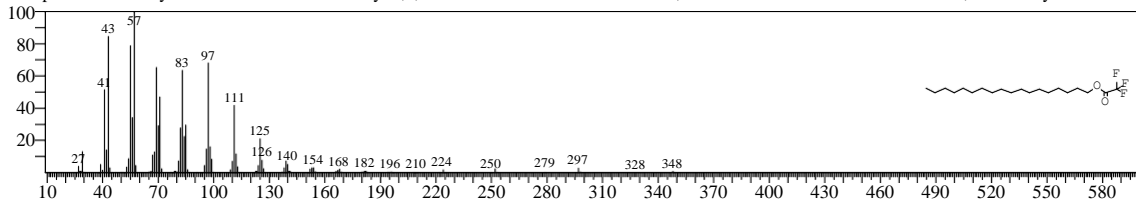

Hit#:5 Entry:41853 Library:NIST20R.lib  
SI:96 Formula:C28H58O CAS:557-61-9 MolWeight:410 RetIndex:3047  
CompName:Octacosanol \$\$ 1-Octacosanol \$\$ n-Octacosanol \$\$ Cluytyl alcohol \$\$ Montanyl alcohol \$\$ Octacosyl alcohol

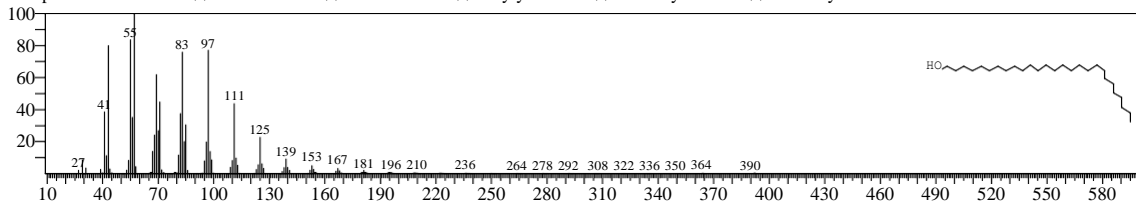

<<Target >>

Line#:17 R.Time:32.333(Scan#:1791) MassPeaks:370  
RawMode:Averaged 32.317-32.350(1790-1792) BasePeak:57.10(5944)  
BG Mode:Calc. from Peak Group 1 - Event 1 Scan

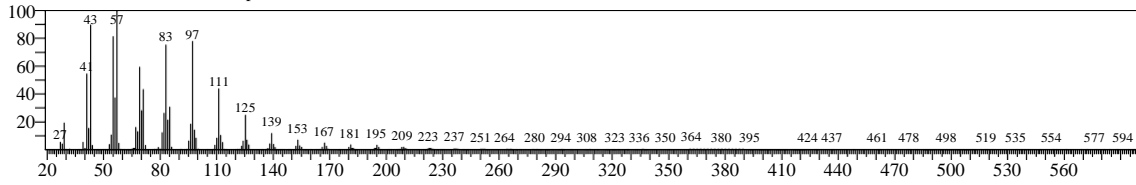

Hit#:1 Entry:41853 Library:NIST20R.lib  
SI:97 Formula:C28H58O CAS:557-61-9 MolWeight:410 RetIndex:3047  
CompName:Octacosanol \$ 1-Octacosanol \$ n-Octacosanol \$ Cluytyl alcohol \$ Montanyl alcohol \$ Octacosyl alcohol

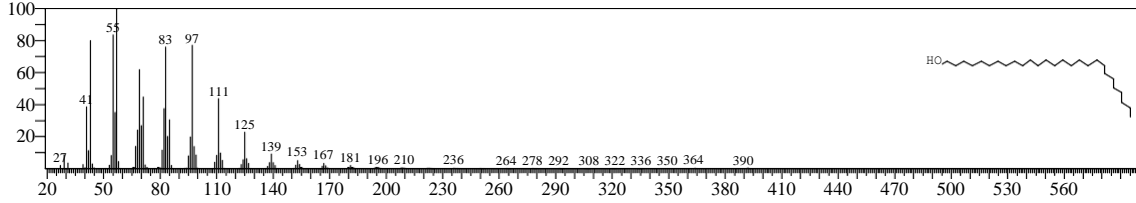

Hit#:2 Entry:234861 Library:NIST20M1.lib  
SI:96 Formula:C20H37F3O2 CAS:79392-43-1 MolWeight:366 RetIndex:2011  
CompName:Octadecyl trifluoroacetate \$ Octadecyl 2,2,2-trifluoroacetate \$ 1-Octadecanol, trifluoroacetate \$ Trifluoroacetic acid, n-octadecyl ester \$ A

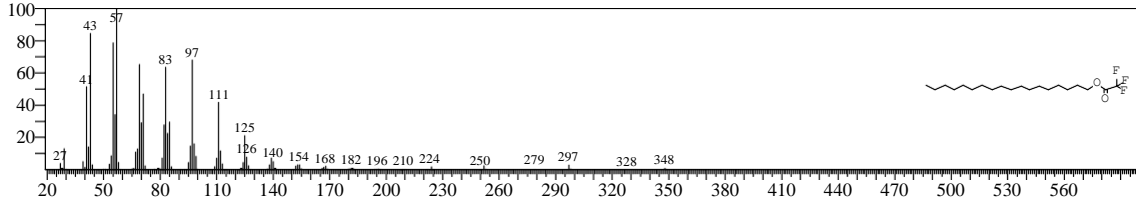

Hit#:3 Entry:221995 Library:NIST20M1.lib  
SI:96 Formula:C19H35F3O2 CAS:0-00-0 MolWeight:352 RetIndex:1911  
CompName:Heptadecyl trifluoroacetate \$ Heptadecyl 2,2,2-trifluoroacetate \$ 1-Heptadecanol, trifluoroacetate \$ Trifluoroacetic acid, n-heptadecyl ester

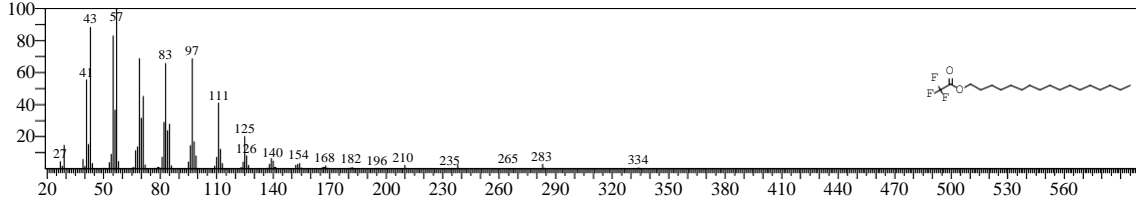

Hit#:4 Entry:40183 Library:NIST20R.lib  
SI:96 Formula:C26H52 CAS:18835-33-1 MolWeight:364 RetIndex:2596  
CompName:1-Hexacosene

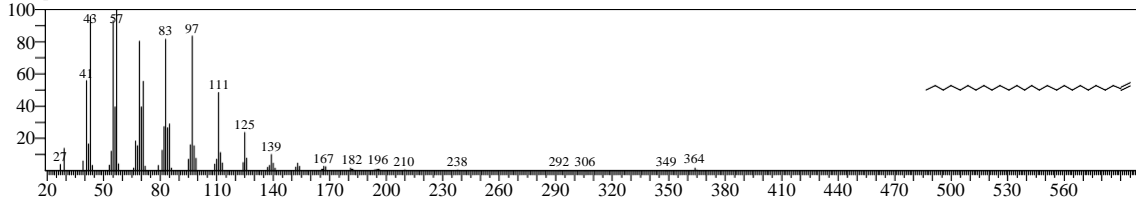

Hit#:5 Entry:1512 Library:NIST20M2.lib  
SI:95 Formula:C20H35F5O2 CAS:959218-78-1 MolWeight:402 RetIndex:1872  
CompName:Pentafluoropropionic acid, heptadecyl ester

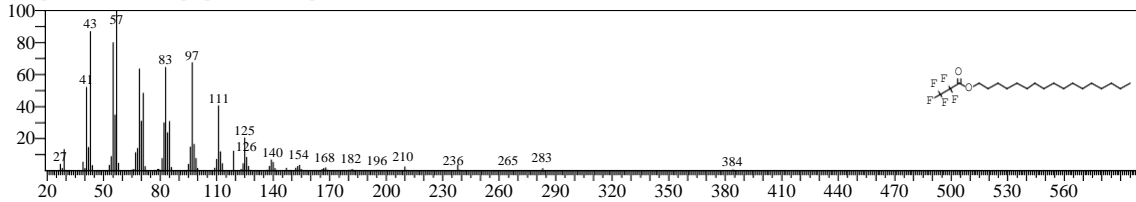

<<Target >>

Line#:18 R.Time:34.450(Scan#:1918) MassPeaks:348  
RawMode:Averaged 34.433-34.467(1917-1919) BasePeak:57.10(3085)  
BG Mode:Calc. from Peak Group 1 - Event 1 Scan

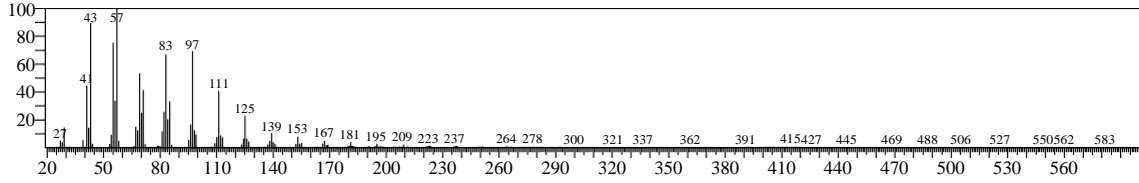

Hit#:1 Entry:234861 Library:NIST20M1.lib  
SI:96 Formula:C20H37F3O2 CAS:79392-43-1 MolWeight:366 RetIndex:2011  
CompName:Octadecyl trifluoroacetate \$\$ Octadecyl 2,2,2-trifluoroacetate \$\$ 1-Octadecanol, trifluoroacetate \$\$ Trifluoroacetic acid, n-octadecyl ester \$\$ A

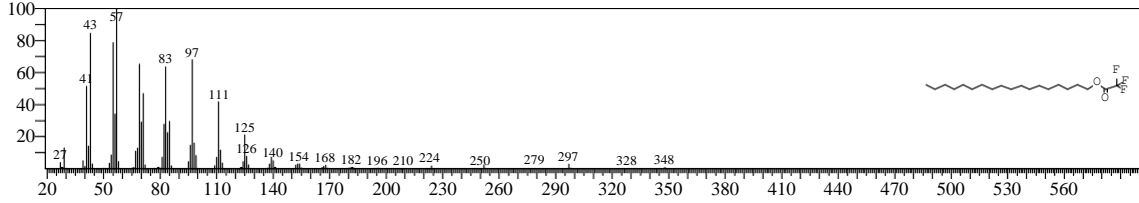

Hit#:2 Entry:41853 Library:NIST20R.lib  
SI:96 Formula:C28H58O CAS:557-61-9 MolWeight:410 RetIndex:3047  
CompName:Octacosanol \$\$ 1-Octacosanol \$\$ n-Octacosanol \$\$ Cluytyl alcohol \$\$ Montanyl alcohol \$\$ Octacosyl alcohol

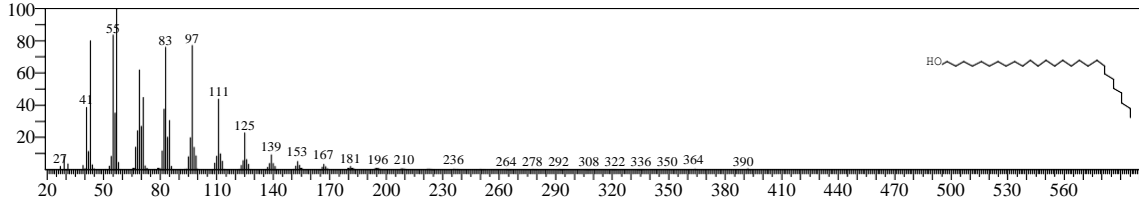

Hit#:3 Entry:17731 Library:NIST20M2.lib  
SI:96 Formula:C25H47F3O2 CAS:0-00-0 MolWeight:436 RetIndex:2508  
CompName:Tricosyl trifluoroacetate \$\$ Tricosyl 2,2,2-trifluoroacetate \$\$ 1-Tricosanol, trifluoroacetate

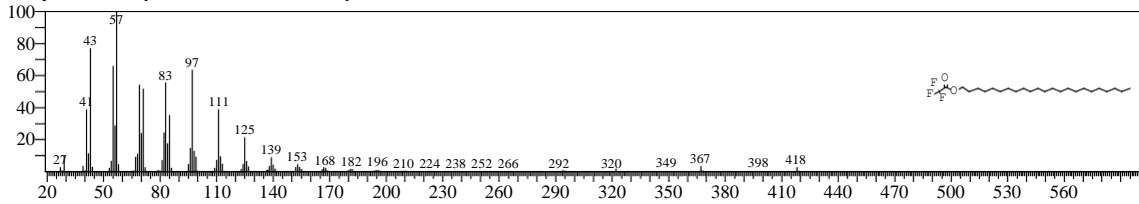

Hit#:4 Entry:35676 Library:NIST20M2.lib  
SI:95 Formula:C25H43F7O2 CAS:0-00-0 MolWeight:508 RetIndex:2230  
CompName:Heneicosyl heptafluorobutyrate \$\$ Heneicosyl 2,2,3,3,4,4,4-heptafluorobutanoate \$\$ 1-Heneicosanol, heptafluorobutyrate \$\$ Heneicosyl perflu

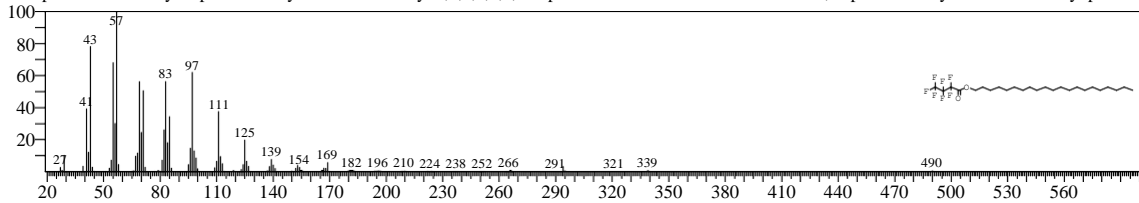

Hit#:5 Entry:221995 Library:NIST20M1.lib  
SI:95 Formula:C19H35F3O2 CAS:0-00-0 MolWeight:352 RetIndex:1911  
CompName:Heptadecyl trifluoroacetate \$\$ Heptadecyl 2,2,2-trifluoroacetate \$\$ 1-Heptadecanol, trifluoroacetate \$\$ Trifluoroacetic acid, n-heptadecyl ester

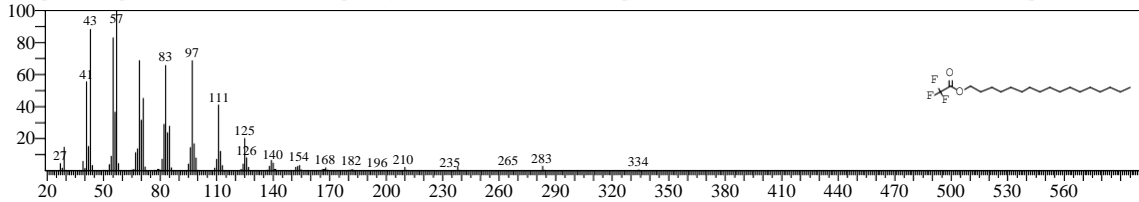

<<Target >>

Line#:19 R.Time:36.350(Scan#:2032) MassPeaks:261  
RawMode:Averaged 36.333-36.367(2031-2033) BasePeak:57.10(1866)  
BG Mode:Calc. from Peak Group 1 - Event 1 Scan

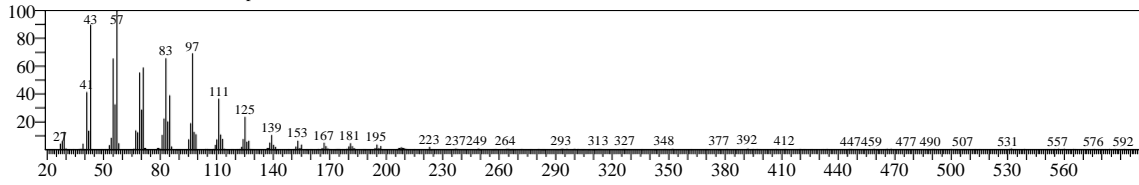

Hit#:1 Entry:17731 Library:NIST20M2.lib  
SI:95 Formula:C25H47F3O2 CAS:0-00-0 MolWeight:436 RetIndex:2508  
CompName:Tricosyl trifluoroacetate \$\$ Tricosyl 2,2,2-trifluoroacetate \$\$ 1-Tricosanol, trifluoroacetate

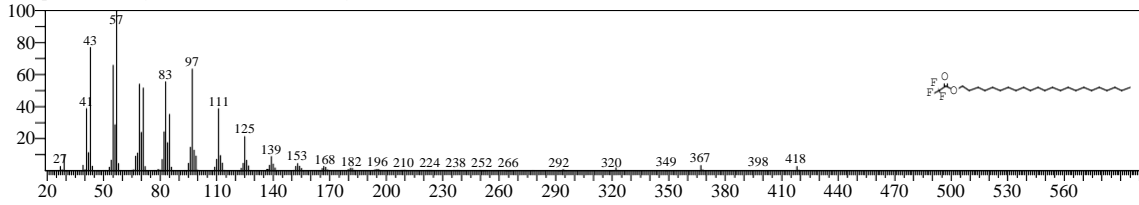

Hit#:2 Entry:35676 Library:NIST20M2.lib  
SI:95 Formula:C25H43F7O2 CAS:0-00-0 MolWeight:508 RetIndex:2230  
CompName:Heneicosyl heptafluorobutyrate \$\$ Heneicosyl 2,2,3,3,4,4,4-heptafluorobutanoate \$\$ 1-Heneicosanol, heptafluorobutyrate \$\$ Heneicosyl perflu

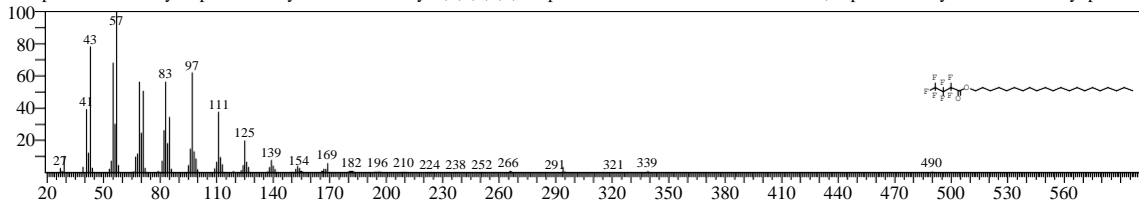

Hit#:3 Entry:20814 Library:NIST20M2.lib  
SI:95 Formula:C23H41F5O2 CAS:0-00-0 MolWeight:444 RetIndex:2170  
CompName:Eicosyl pentafluoropropionate \$\$ Eicosyl 2,2,3,3,3-pentafluoropropionate \$\$ 1-Eicosanol, pentafluoropropionate

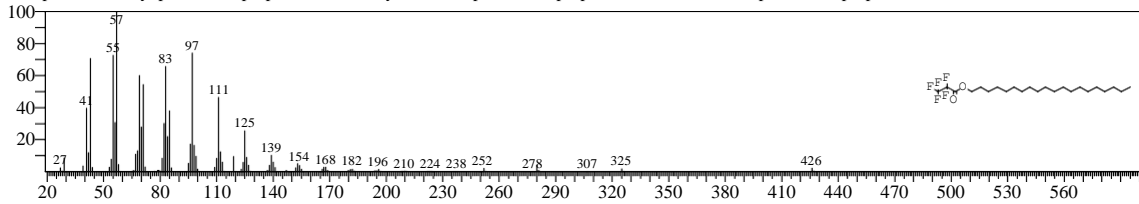

Hit#:4 Entry:11742 Library:NIST20M2.lib  
SI:95 Formula:C24H45F3O2 CAS:0-00-0 MolWeight:422 RetIndex:2408  
CompName:Docosyl trifluoroacetate \$\$ Docosyl 2,2,2-trifluoroacetate \$\$ 1-Docosanol, trifluoroacetate

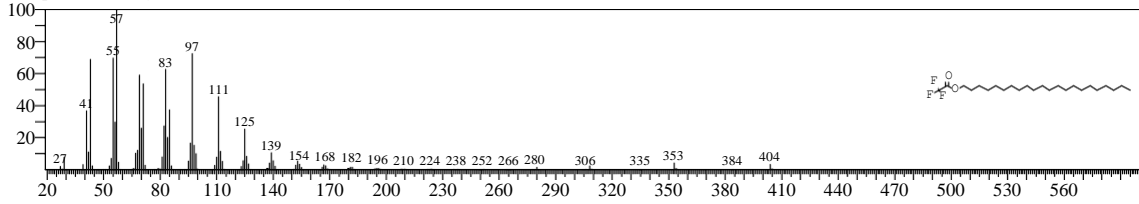

Hit#:5 Entry:234861 Library:NIST20M1.lib  
SI:95 Formula:C20H37F3O2 CAS:79392-43-1 MolWeight:366 RetIndex:2011  
CompName:Octadecyl trifluoroacetate \$\$ Octadecyl 2,2,2-trifluoroacetate \$\$ 1-Octadecanol, trifluoroacetate \$\$ Trifluoroacetic acid, n-octadecyl ester \$\$ A

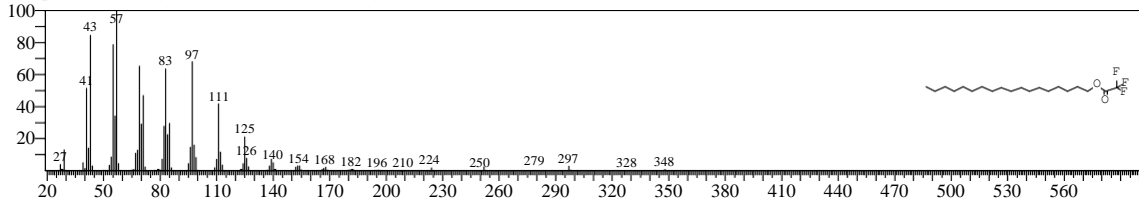

<< Target >>

Line#:20 R.Time:40.750(Scan#:2296) MassPeaks:513  
RawMode:Averaged 40.733-40.767(2295-2297) BasePeak:57.10(23712)  
BG Mode:Calc. from Peak Group 1 - Event 1 Scan

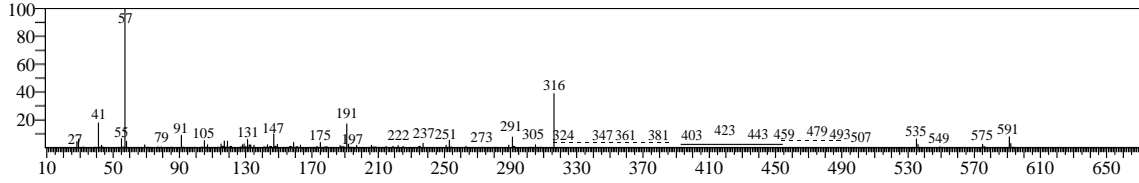

Hit#:1 Entry:44526 Library:NIST20M2.lib  
SI:65 Formula:C42H63O4P CAS:95906-11-9 MolWeight:662 RetIndex:0  
CompName:Tris(2,4-di-tert-butylphenyl) phosphate \$ Phenol, 2,4-bis(1,1-dimethylethyl)-, phosph

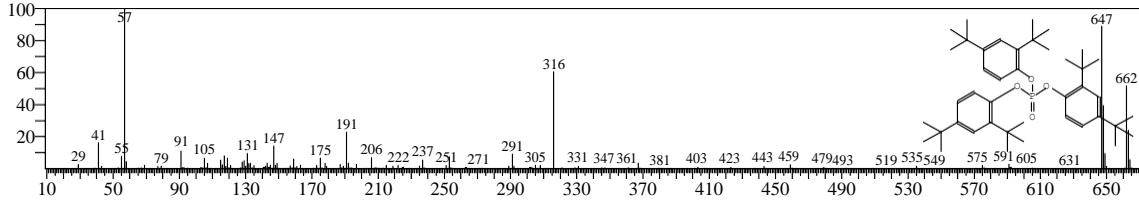

Hit#:2 Entry:42214 Library:NIST20M2.lib  
SI:60 Formula:C40H58O3 CAS:134868-71-6 MolWeight:586 RetIndex:4549  
CompName:2-tert-Butyl-4,6-bis(3,5-di-tert-butyl-4-hydroxybenzyl)phenol

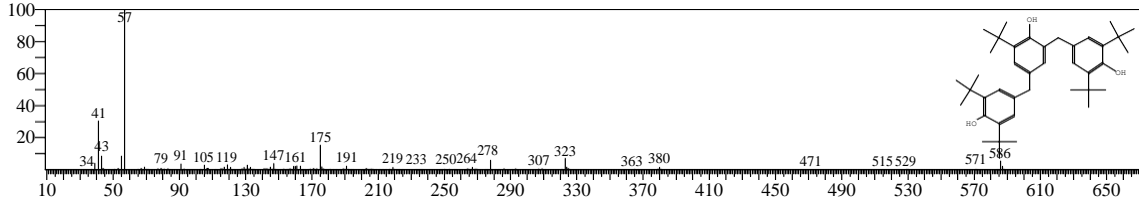

Hit#:3 Entry:182391 Library:NIST20M1.lib  
SI:60 Formula:C17H23F3O2 CAS:0-00-0 MolWeight:316 RetIndex:1662  
CompName:2,6-Di-tert-butyl-4-methylphenol, O-trifluoroacetyl \$ 2,6-Di-tert-butyl-4-methylphenyl 2,2,2-trifluoroacetate

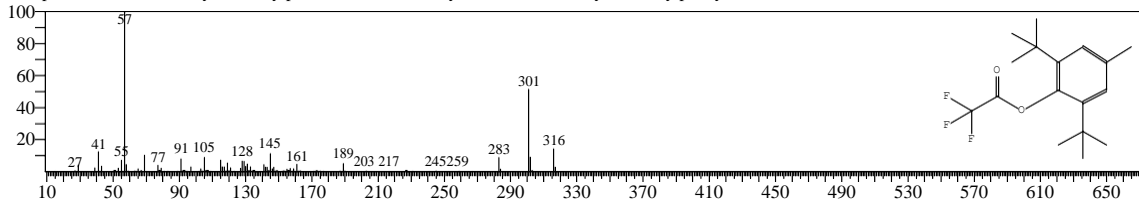

Hit#:4 Entry:43041 Library:NIST20M2.lib  
SI:60 Formula:C36H49BrO3 CAS:98007-30-8 MolWeight:608 RetIndex:4542  
CompName:4-Bromo-2,6-bis(3,5-di-tert-butyl-4-hydroxybenzyl)phenol

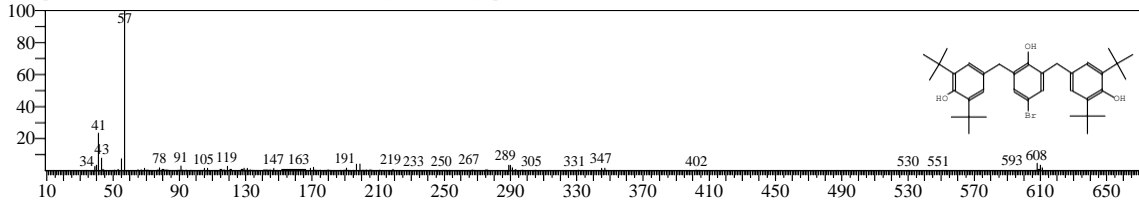

Hit#:5 Entry:214636 Library:NIST20M1.lib  
SI:59 Formula:C23H36O2 CAS:56771-86-9 MolWeight:344 RetIndex:2435  
CompName:1,4-Epoxy-naphthalene-1(2H)-methanol, 4,5,7-tris(1,1-dimethylethyl)-3,4-dihydro-

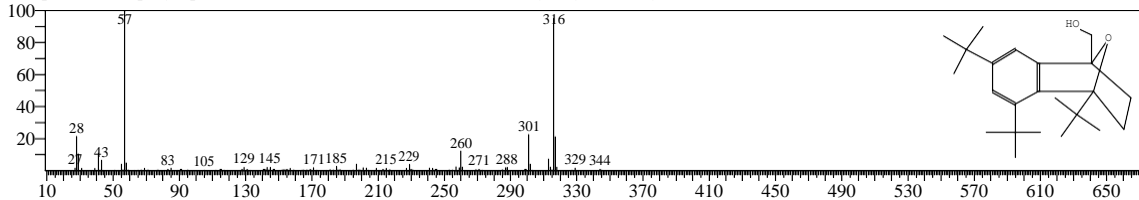

Supplement: DataSheet_1.pdf [file DataSheet_1.pdf]
